# Supplementary material for: Impact of antigen test target failure and testing strategies on the transmission of SARS-CoV-2 variants
Source: Research Square preprint supplement (doi:10.21203/rs.3.rs-1481444/v1), 2022-03-28
Supplement: Supplementary file 1 [file 13a58834bc3f499dd6db83ed.xlsx]

## Sheet: ANCOV and DNCOV
Code	Sex	Age range	Hospital ward	DNCOV	ANCOV	Concordance	Ct S gene	Ct ORF1 gene	Symptoms	Pneumonia	Symptom onset: distance in days from the date of admission	Symptom type
ZPXIFYOHOZSV	m	030-034	Emergency	negative	negative	concordant	-	-	-	-
JLCBXKIWSZDM	m	030-034	Infectious disease	negative	negative	concordant	-	-	-	-
WDQPNUJPGVXO	f	085-089	Emergency	negative	negative	concordant	-	-	-	-
KNMMAFVRKZFW	m	065-069	Emergency	negative	negative	concordant	-	-	-	-
EKTRQMKITGGH	m	020-024	Emergency	negative	negative	concordant	-	-	-	-
SRMFMVEWMMNC	f	070-074	Emergency	positive	positive	concordant	16	16	Symptomatic	No	12	myalgia
IEDHGTKODQNV	f	040-044	Emergency	negative	negative	concordant	-	-	-	-
FTEXUKCCOFYZ	m	080-084	Emergency	negative	negative	concordant	-	-	-	-
PHKRQKXQJXTY	m	055-059	Infectious disease	negative	negative	concordant	-	-	-	-
PHKRQKXQJXTY	m	055-059	Infectious disease	negative	negative	concordant	-	-	-	-
ULLPMJYEDBZW	m	090-094	Infectious disease	negative	negative	concordant	-	-	-	-
UBKXIJFCXKOQ	m	070-074	Emergency	negative	negative	concordant	-	-	-	-
EZALSWSUEFOO	f	090-094	Emergency	negative	negative	concordant	-	-	-	-
GWSQTRDWJOHQ	f	085-089	Emergency	negative	negative	concordant	-	-	-	-
OQDDFWJIHRYG	m	035-039	Emergency	positive	positive	concordant	14.7	15.1	Asymptomatic	No
UDNTUKTVDVSO	m	030-034	Emergency	negative	negative	concordant	-	-	-	-
PZHEHUQDGZVR	f	080-084	Emergency	negative	negative	concordant	-	-	-	-
VXGTFANJWTCC	f	090-094	Infectious disease	negative	negative	concordant	-	-	-	-
ROHHVFJLJWKF	f	075-079	Infectious disease	negative	negative	concordant	-	-	-	-
IKLXLCGDWNBM	f	075-079	Infectious disease	negative	negative	concordant	-	-	-	-
FVCOFEQHVYAJ	f	065-069	Emergency	negative	negative	concordant	-	-	-	-
KXWOUYKINWDU	m	075-079	Emergency	negative	negative	concordant	-	-	-	-
JDYKCYSMJMAD	f	035-039	Emergency	negative	negative	concordant	-	-	-	-
FSTWGNAUYJPX	m	055-059	Emergency	negative	negative	concordant	-	-	-	-
BDALKHFBXVUD	m	025-029	Emergency	negative	negative	concordant	-	-	-	-
HBRPCLYWRQXM	m	025-029	Emergency	negative	negative	concordant	-	-	-	-
WMFMZBIYGPVU	f	065-069	Emergency	negative	negative	concordant	-	-	-	-
CVOTYTPFADZX	m	035-039	Emergency	negative	negative	concordant	-	-	-	-
SVMNIJDWGQJO	m	050-054	Emergency	negative	negative	concordant	-	-	-	-
TGEFWGNXYMBF	m	055-059	Emergency	negative	negative	concordant	-	-	-	-
GOMMCPLZDDUL	f	065-069	Infectious disease	negative	negative	concordant	-	-	-	-
NUDRKMKXOMYW	f	035-039	Emergency	negative	negative	concordant	-	-	-	-
UDWIVRHYBSIO	m	030-034	Infectious disease	negative	negative	concordant	-	-	-	-
JTRMDZMSEHGY	f	050-054	Emergency	negative	negative	concordant	-	-	-	-
JCJPGWFRQNDD	m	030-034	Emergency	negative	negative	concordant	-	-	-	-
IROKYJONFBAW	m	060-064	Emergency	negative	negative	concordant	-	-	-	-
ZCDZKEHTPVMS	f	090-094	Emergency	negative	negative	concordant	-	-	-	-
RADDDKRJVIES	f	045-049	Emergency	negative	negative	concordant	-	-	-	-
ZOWLKZWLAMFP	f	050-054	Emergency	negative	negative	concordant	-	-	-	-
SJWEQPYENDSQ	f	065-069	Emergency	negative	negative	concordant	-	-	-	-
QRSMPVJVCXUF	m	080-084	Emergency	negative	negative	concordant	-	-	-	-
IYHIMNRVKPFC	m	040-044	Emergency	positive	positive	concordant	16.7	17.1	Symptomatic	Yes	0	fever
OVLVIZITBCTW	m	025-029	Emergency	negative	negative	concordant	-	-	-	-
YBUXIKUZVCRK	f	090-094	Emergency	negative	negative	concordant	-	-	-	-
XKITFDPNZCJN	f	065-069	Emergency	negative	negative	concordant	-	-	-	-
ZEXYAAPBJYTZ	m	080-084	Infectious disease	negative	negative	concordant	-	-	-	-
LPMPDNPGVQYK	m	020-024	Emergency	negative	negative	concordant	-	-	-	-
IFJPWJTFVTTJ	f	080-084	Emergency	negative	negative	concordant	-	-	-	-
QERCYQETQEPJ	m	070-074	Emergency	negative	negative	concordant	-	-	-	-
ALDFHQZCEGOV	m	020-024	Emergency	negative	negative	concordant	-	-	-	-
GBITPRLGXHBH	m	060-064	Infectious disease	negative	negative	concordant	-	-	-	-
OTCIUOMPTKPP	f	070-074	Emergency	negative	negative	concordant	-	-	-	-
LYPWGNLJPSIB	f	035-039	Emergency	negative	negative	concordant	-	-	-	-
AMKQGACHIPPL	m	045-049	Emergency	negative	negative	concordant	-	-	-	-
MEIAADQVOUQV	f	040-044	Emergency	negative	negative	concordant	-	-	-	-
AQQWVCTDDZAJ	m	040-044	Emergency	negative	negative	concordant	-	-	-	-
HPLCQDPLYPKC	m	045-049	Infectious disease	negative	negative	concordant	-	-	-	-
RWZURIVDVRKG	m	075-079	Emergency	negative	negative	concordant	-	-	-	-
NQSWAALXQSAZ	f	065-069	Infectious disease	negative	negative	concordant	-	-	-	-
OAZFDOLNWLHS	m	075-079	Emergency	negative	negative	concordant	-	-	-	-
FDGSZHIWRMXD	f	035-039	Emergency	negative	negative	concordant	-	-	-	-
LPCCXKWVAJYC	m	070-074	Emergency	negative	negative	concordant	-	-	-	-
MHDMLUNJZEIW	f	085-089	Emergency	negative	negative	concordant	-	-	-	-
UIHGCLDYYMHB	m	045-049	Emergency	negative	negative	concordant	-	-	-	-
FAKCQICPBDTI	f	085-089	Infectious disease	negative	negative	concordant	-	-	-	-
RUWWSVBKYPKO	f	025-029	Emergency	negative	negative	concordant	-	-	-	-
SOFHIQDBETOY	f	030-034	Emergency	negative	negative	concordant	-	-	-	-
JZXOKRLSXXSO	m	070-074	Infectious disease	negative	negative	concordant	-	-	-	-
YMMGRINDHFYW	m	060-064	Emergency	negative	negative	concordant	-	-	-	-
VPPQRNLYQFKZ	m	020-024	Emergency	positive	positive	concordant	21	21	Symptomatic	Yes	6	asthenia, fever
GTBNSACDFAIT	f	065-069	Emergency	positive	positive	concordant	27	31	Symptomatic	No	6	asthenia
ZELPBTLBQKJP	f	025-029	Emergency	negative	negative	concordant	-	-	-	-
YVNIDKIHDZWJ	f	045-049	Emergency	positive	positive	concordant	17	18	Symptomatic	No	0	headache
BEXMTQPXUDNA	f	060-064	Emergency	negative	negative	concordant	-	-	-	-
VLISPUHYEGUY	m	075-079	Emergency	negative	negative	concordant	-	-	-	-
YJVUASGVDKRO	m	075-079	Emergency	negative	negative	concordant	-	-	-	-
LMOXDQKWOAME	f	085-089	Emergency	negative	negative	concordant	-	-	-	-
UEMJWZEQIEIP	f	070-074	Infectious disease	negative	negative	concordant	-	-	-	-
IFTNXOUNWDDO	f	090-094	Emergency	negative	negative	concordant	-	-	-	-
TPWSVYNENLVL	m	040-044	Emergency	negative	negative	concordant	-	-	-	-
NJNUBMGCTUMR	f	065-069	Infectious disease	negative	negative	concordant	-	-	-	-
QWUGDSTRWSNC	m	085-089	Emergency	negative	negative	concordant	-	-	-	-
DKCNDOCGSWNK	m	050-054	Emergency	negative	negative	concordant	-	-	-	-
ZMMZZEXUOHTX	f	095-099	Infectious disease	negative	negative	concordant	-	-	-	-
SFTPNQQTBXCU	m	050-054	Emergency	negative	negative	concordant	-	-	-	-
XVBSQRTBNQVF	f	075-079	Infectious disease	negative	negative	concordant	-	-	-	-
IDBBOBJSUFLA	m	090-094	Emergency	negative	negative	concordant	-	-	-	-
ZGESVFHZYZDZ	m	085-089	Infectious disease	negative	negative	concordant	-	-	-	-
ZYTQEUYKBIEY	m	075-079	Emergency	negative	negative	concordant	-	-	-	-
ESYWZFHZGCDV	f	095-099	Infectious disease	negative	negative	concordant	-	-	-	-
BDZJSSBQSQSQ	m	025-029	Emergency	negative	negative	concordant	-	-	-	-
QWTPHHRVREAP	m	070-074	Emergency	negative	negative	concordant	-	-	-	-
YPVFYVANHRAY	m	020-024	Emergency	negative	negative	concordant	-	-	-	-
EBUNJFEACOQK	m	080-084	Emergency	negative	negative	concordant	-	-	-	-
CFESCLFKINJB	m	090-094	Emergency	negative	negative	concordant	-	-	-	-
KIFQTTICOGYN	m	090-094	Emergency	negative	negative	concordant	-	-	-	-
PIGXNLHXXRDQ	f	065-069	Infectious disease	negative	negative	concordant	-	-	-	-
HBFNVLXXJCXE	f	065-069	Emergency	negative	negative	concordant	-	-	-	-
NPXHOFBSIHJL	f	075-079	Emergency	negative	negative	concordant	-	-	-	-
MYSITSXOCACY	f	065-069	Emergency	negative	negative	concordant	-	-	-	-
UEMVBESCZKDJ	m	055-059	Emergency	negative	negative	concordant	-	-	-	-
YGBREBGVDKUK	f	060-064	Emergency	negative	negative	concordant	-	-	-	-
NZDXFFEDXHXK	m	020-024	Emergency	positive	positive	concordant	18	18	Symptomatic	Yes	12	asthenia
CISETNJLPEYL	m	070-074	Emergency	negative	negative	concordant	-	-	-	-
UEJPQMLBJQJM	m	070-074	Emergency	negative	negative	concordant	-	-	-	-
MTEDOZBFAJMT	f	090-094	Infectious disease	negative	negative	concordant	-	-	-	-
WQTMCZGZIKFJ	m	095-099	Emergency	negative	negative	concordant	-	-	-	-
CMUWMAVXDGIR	m	075-079	Emergency	negative	negative	concordant	-	-	-	-
FHKKWDRFWWAE	f	035-039	Emergency	negative	negative	concordant	-	-	-	-
HLECJSUZDQUW	m	085-089	Emergency	negative	negative	concordant	-	-	-	-
BUCRCKSKSBVG	m	030-034	Emergency	positive	positive	concordant	14.5	15	Symptomatic	No	1	fever
ZRFSXJRPENPA	f	095-099	Infectious disease	negative	negative	concordant	-	-	-	-
SKHMLEGHRTEB	f	090-094	Infectious disease	negative	negative	concordant	-	-	-	-
ZLOSYKPCUGYV	f	045-049	Emergency	negative	negative	concordant	-	-	-	-
XAGJHTUECUYT	m	080-084	Emergency	negative	negative	concordant	-	-	-	-
MYILVPHUUZIW	m	080-084	Emergency	negative	negative	concordant	-	-	-	-
XCHLUXJYHHBN	f	090-094	Emergency	negative	negative	concordant	-	-	-	-
XFBNKRLOOHQM	m	045-049	Infectious disease	negative	negative	concordant	-	-	-	-
NYQXTTJNJZZD	f	085-089	Infectious disease	negative	negative	concordant	-	-	-	-
INXOXCWFCMZU	f	030-034	Emergency	negative	negative	concordant	-	-	-	-
NUEKCTOZNFDA	f	025-029	Infectious disease	negative	negative	concordant	-	-	-	-
IWMJNPPRBCMW	f	060-064	Emergency	negative	negative	concordant	-	-	-	-
NMJNQKGTNWBS	m	075-079	Emergency	negative	negative	concordant	-	-	-	-
TBYUYAVIQDUV	f	065-069	Infectious disease	negative	negative	concordant	-	-	-	-
IAZBMONCGYQA	f	055-059	Emergency	negative	negative	concordant	-	-	-	-
HVNIBDKVWJDR	m	080-084	Emergency	negative	negative	concordant	-	-	-	-
DISTBCYHOIDJ	f	070-074	Infectious disease	negative	negative	concordant	-	-	-	-
LPGYVXOWKGDE	m	050-054	Emergency	positive	positive	concordant	15.8	15.8	Symptomatic	No	0	headache
BEFPDMSIILPK	f	070-074	Emergency	negative	negative	concordant	-	-	-	-
IQKVNHUJSSBL	f	070-074	Infectious disease	negative	negative	concordant	-	-	-	-
LSQCIJKQEAZY	m	090-094	Infectious disease	negative	negative	concordant	-	-	-	-
BZORERRPVDYY	m	090-094	Emergency	negative	negative	concordant	-	-	-	-
BZORERRPVDYY	m	090-094	Emergency	negative	negative	concordant	-	-	-	-
KQIPMFPGOTLO	m	065-069	Infectious disease	negative	negative	concordant	-	-	-	-
WEYOYJDIMNOY	f	085-089	Emergency	negative	negative	concordant	-	-	-	-
LHYQPAFPRKHO	f	060-064	Emergency	negative	negative	concordant	-	-	-	-
EUJJKJQSFUUY	f	085-089	Emergency	negative	negative	concordant	-	-	-	-
EUJJKJQSFUUY	f	085-089	Infectious disease	negative	negative	concordant	-	-	-	-
CXNBWCBZBVEV	m	075-079	Emergency	negative	negative	concordant	-	-	-	-
GPJGNNNFZLNK	m	080-084	Infectious disease	negative	negative	concordant	-	-	-	-
IWIEKFLHPIJE	f	080-084	Emergency	negative	negative	concordant	-	-	-	-
VCEEJHSVUPAY	f	090-094	Infectious disease	negative	negative	concordant	-	-	-	-
QTRRBQYGSQRF	f	080-084	Infectious disease	negative	negative	concordant	-	-	-	-
PKBFUVCHKKMP	f	045-049	Emergency	negative	negative	concordant	-	-	-	-
MSOQUIVIWPMA	f	040-044	Emergency	negative	negative	concordant	-	-	-	-
SLIHIIQRPLWP	m	085-089	Emergency	negative	negative	concordant	-	-	-	-
UKYFWDYCDLDM	f	080-084	Emergency	negative	negative	concordant	-	-	-	-
OECANQVVVLPM	m	080-084	Emergency	negative	negative	concordant	-	-	-	-
JWDUQMHQWLSX	m	060-064	Infectious disease	negative	negative	concordant	-	-	-	-
KGEVJKLEIYPS	m	065-069	Emergency	negative	negative	concordant	-	-	-	-
GTJYQTFJMMCO	f	080-084	Emergency	negative	negative	concordant	-	-	-	-
UOAACMPRUECH	f	025-029	Emergency	negative	negative	concordant	-	-	-	-
AGBOKOAKREJP	m	075-079	Emergency	negative	negative	concordant	-	-	-	-
JWNULDBLIEIH	f	045-049	Infectious disease	negative	negative	concordant	-	-	-	-
IJZFZMYCQXOL	m	080-084	Emergency	negative	negative	concordant	-	-	-	-
FNHJQDOZDQPZ	m	055-059	Emergency	negative	negative	concordant	-	-	-	-
UZCTYNKXEUHT	m	030-034	Emergency	negative	negative	concordant	-	-	-	-
XMVCEMJHXONF	f	085-089	Emergency	negative	negative	concordant	-	-	-	-
XMVCEMJHXONF	f	085-089	Emergency	negative	negative	concordant	-	-	-	-
XRJVWBSIMROK	m	040-044	Emergency	negative	negative	concordant	-	-	-	-
GTHBHDFZPSRR	f	075-079	Emergency	negative	negative	concordant	-	-	-	-
WEZVIUMCFLCG	f	080-084	Emergency	negative	negative	concordant	-	-	-	-
KLNDTBWXXJPL	f	050-054	Infectious disease	negative	negative	concordant	-	-	-	-
GFKQBCXBLKZE	f	060-064	Infectious disease	negative	negative	concordant	-	-	-	-
VBGWUIHYMTCP	f	085-089	Infectious disease	negative	negative	concordant	-	-	-	-
DWNAYUAOPTZE	f	080-084	Emergency	negative	negative	concordant	-	-	-	-
QSHNSISPFMPO	m	040-044	Emergency	negative	negative	concordant	-	-	-	-
ASBCTNDPYBIC	f	075-079	Infectious disease	negative	negative	concordant	-	-	-	-
BPTTXGJTITRL	m	045-049	Emergency	negative	negative	concordant	-	-	-	-
PTADNPTJBKQH	m	025-029	Emergency	positive	positive	concordant	15	15	Symptomatic	No	0	fever
RRUGRCKLRPUQ	m	100-104	Emergency	negative	negative	concordant	-	-	-	-
YRVJXOCUPTPI	f	030-034	Emergency	negative	negative	concordant	-	-	-	-
SRKHBRMMUABH	f	045-049	Emergency	negative	negative	concordant	-	-	-	-
WECJWESPBBQC	f	075-079	Infectious disease	negative	negative	concordant	-	-	-	-
GZICERWPIFEB	m	045-049	Emergency	negative	negative	concordant	-	-	-	-
QVTBDXELFXRZ	f	035-039	Emergency	negative	negative	concordant	-	-	-	-
ABQRSCPHCEHE	m	065-069	Infectious disease	negative	negative	concordant	-	-	-	-
MPFWUNZVPMAB	m	045-049	Infectious disease	negative	negative	concordant	-	-	-	-
QGMKRVRKGDBQ	f	040-044	Emergency	positive	positive	concordant	15.1	15.4	Symptomatic	No	0	headache
VTWRXAQKYKRD	m	085-089	Emergency	negative	negative	concordant	-	-	-	-
BQCBJPGFCZOJ	m	065-069	Emergency	negative	negative	concordant	-	-	-	-
HJDGAMIDTZIW	m	080-084	Infectious disease	negative	negative	concordant	-	-	-	-
VKZOZTIQJLUV	f	050-054	Emergency	negative	negative	concordant	-	-	-	-
JWXWETJTILEC	f	090-094	Emergency	negative	negative	concordant	-	-	-	-
PDUSPJVTHYRX	f	030-034	Emergency	negative	negative	concordant	-	-	-	-
UARKJMMFFDWH	m	040-044	Emergency	negative	negative	concordant	-	-	-	-
OGTGKBKZAOHZ	f	050-054	Emergency	negative	negative	concordant	-	-	-	-
IOEBZXXXBRJV	f	085-089	Emergency	negative	negative	concordant	-	-	-	-
PCSTMKAFONSX	f	045-049	Emergency	negative	negative	concordant	-	-	-	-
IOHIYHSQDXDQ	m	020-024	Emergency	negative	negative	concordant	-	-	-	-
XOXWRQHQEPON	m	090-094	Emergency	negative	negative	concordant	-	-	-	-
ROQSFETEKZSF	f	080-084	Emergency	negative	negative	concordant	-	-	-	-
QMAIFNVAXWSR	f	045-049	Emergency	negative	negative	concordant	-	-	-	-
ELHEBYGUDUTS	m	085-089	Emergency	negative	negative	concordant	-	-	-	-
HSXEZDBOOUID	m	020-024	Emergency	negative	negative	concordant	-	-	-	-
ODMGEBMTWXXV	f	085-089	Infectious disease	negative	negative	concordant	-	-	-	-
EZYRTDFMJIBX	m	070-074	Infectious disease	negative	negative	concordant	-	-	-	-
TNAFXUGNWXLU	m	095-099	Infectious disease	negative	negative	concordant	-	-	-	-
PJILANGWHFJC	f	080-084	Emergency	negative	negative	concordant	-	-	-	-
JWYZJJJZNGRH	f	035-039	Emergency	negative	negative	concordant	-	-	-	-
PKZZNTNLOLXI	m	070-074	Emergency	negative	negative	concordant	-	-	-	-
DFMNEMPRVSIX	f	025-029	Emergency	negative	negative	concordant	-	-	-	-
SWHFTNVKAUGA	m	055-059	Emergency	negative	negative	concordant	-	-	-	-
TWLGFPBZJCUG	f	060-064	Infectious disease	negative	negative	concordant	-	-	-	-
HZUBIUKXWWKE	m	030-034	Emergency	negative	negative	concordant	-	-	-	-
STRDGHCYWPQM	m	045-049	Emergency	negative	negative	concordant	-	-	-	-
LDEXGTYHCLLJ	m	025-029	Emergency	negative	negative	concordant	-	-	-	-
ZWPAJGJGXIRG	m	025-029	Emergency	positive	negative	discordant	34.8	NA	Symptomatic	No	0	vertigo
NGYNNZFDPNVB	m	065-069	Emergency	negative	negative	concordant	-	-	-	-
HMVMPOQZWLHL	m	055-059	Emergency	positive	negative	discordant	33.2	32.5	Symptomatic	No	14	headache
YRXWVCFMAHBP	m	080-084	Emergency	negative	negative	concordant	-	-	-	-
WCSRZIDGVEOD	f	055-059	Emergency	negative	negative	concordant	-	-	-	-
HAKFQMOWZMTF	f	085-089	Infectious disease	negative	negative	concordant	-	-	-	-
OLIFHEPBTHCL	m	065-069	Infectious disease	negative	negative	concordant	-	-	-	-
SPFEFTAVEFQW	f	070-074	Emergency	negative	negative	concordant	-	-	-	-
DUAUPSVUNHQO	f	035-039	Emergency	negative	negative	concordant	-	-	-	-
MNNHZOTDABUA	m	060-064	Infectious disease	negative	negative	concordant	-	-	-	-
WWVISXFNATHN	m	045-049	Infectious disease	negative	negative	concordant	-	-	-	-
DWVAWECUFGQD	m	065-069	Emergency	negative	negative	concordant	-	-	-	-
XHLZZITKYBMS	m	060-064	Emergency	negative	negative	concordant	-	-	-	-
GIFCMNWXYLBW	m	070-074	Infectious disease	negative	negative	concordant	-	-	-	-
STBADCMBHTBR	f	070-074	Emergency	negative	negative	concordant	-	-	-	-
ZAZTKSVVFUHL	f	090-094	Emergency	negative	negative	concordant	-	-	-	-
KENBDRXROIND	m	075-079	Emergency	negative	negative	concordant	-	-	-	-
IECTXKNJQADP	f	045-049	Emergency	negative	negative	concordant	-	-	-	-
POZFQVSRGRWC	m	085-089	Emergency	negative	negative	concordant	-	-	-	-
MQRIMYICGZWG	f	095-099	Emergency	negative	negative	concordant	-	-	-	-
LCBVDIXOZSAS	f	055-059	Emergency	negative	negative	concordant	-	-	-	-
NUVHEMQTKDZR	f	090-094	Infectious disease	negative	negative	concordant	-	-	-	-
DYUHEBCIFHOQ	m	035-039	Emergency	negative	negative	concordant	-	-	-	-
VRUOTFNHZBFA	f	085-089	Emergency	negative	negative	concordant	-	-	-	-
ZVXPOUUGJBBF	f	065-069	Infectious disease	negative	negative	concordant	-	-	-	-
QRKLIADADRDR	m	020-024	Emergency	negative	negative	concordant	-	-	-	-
OARKJZQOSZNM	m	050-054	Emergency	negative	negative	concordant	-	-	-	-
PYWLLLGUMSFL	m	055-059	Emergency	negative	negative	concordant	-	-	-	-
EGGTUSQVXFLK	f	040-044	Infectious disease	negative	negative	concordant	-	-	-	-
XJDSEHSGBJTB	m	050-054	Infectious disease	negative	negative	concordant	-	-	-	-
WBIYCZXFJZVT	f	090-094	Emergency	negative	negative	concordant	-	-	-	-
AEUPEIOOWBWI	m	045-049	Emergency	negative	negative	concordant	-	-	-	-
RIFETJDJJEUJ	f	075-079	Emergency	negative	negative	concordant	-	-	-	-
LXLLYAOXGVDA	m	095-099	Emergency	negative	negative	concordant	-	-	-	-
LXLLYAOXGVDA	m	095-099	Infectious disease	negative	negative	concordant	-	-	-	-
LIAIIUDDVBNU	f	085-089	Emergency	negative	negative	concordant	-	-	-	-
PVAUZTTFRPGZ	m	065-069	Emergency	negative	negative	concordant	-	-	-	-
AJOIYNAHSCWD	f	095-099	Infectious disease	negative	negative	concordant	-	-	-	-
PZKGSKIMERBS	f	040-044	Emergency	negative	negative	concordant	-	-	-	-
QOZJQLXPFSMU	f	085-089	Infectious disease	negative	negative	concordant	-	-	-	-
MGGAMJENWWXC	m	050-054	Emergency	negative	negative	concordant	-	-	-	-
EFHRQKKBSDZR	f	080-084	Emergency	negative	negative	concordant	-	-	-	-
DKDGNETVOVLA	m	055-059	Emergency	negative	negative	concordant	-	-	-	-
VCLULMSQMIKM	f	085-089	Emergency	negative	negative	concordant	-	-	-	-
KYRAORZCEIMJ	m	040-044	Infectious disease	negative	negative	concordant	-	-	-	-
KNQMSLXYJOHD	f	055-059	Emergency	negative	negative	concordant	-	-	-	-
IPBYJLKRHZUD	m	080-084	Infectious disease	negative	negative	concordant	-	-	-	-
MCHRJMQOWIHF	m	085-089	Emergency	negative	negative	concordant	-	-	-	-
EMCJRYVDJOTN	m	060-064	Emergency	negative	negative	concordant	-	-	-	-
OCAAYCTZKDWT	m	050-054	Emergency	negative	negative	concordant	-	-	-	-
MAUNWSWMLYRP	m	020-024	Emergency	negative	negative	concordant	-	-	-	-
KNFEWOCONCUY	m	040-044	Infectious disease	negative	negative	concordant	-	-	-	-
EDSHBMTEYZSU	m	080-084	Emergency	negative	negative	concordant	-	-	-	-
WTLFACVUSSVL	f	075-079	Emergency	negative	negative	concordant	-	-	-	-
RYCIWCFYXTUI	m	080-084	Emergency	negative	negative	concordant	-	-	-	-
QQIVOCUWITPS	m	080-084	Infectious disease	negative	negative	concordant	-	-	-	-
PESOZQCNCNXB	m	040-044	Emergency	negative	negative	concordant	-	-	-	-
QBNAYRYCPYQV	m	025-029	Emergency	negative	negative	concordant	-	-	-	-
PGGFPXZGGZZV	m	060-064	Emergency	negative	negative	concordant	-	-	-	-
ZNUQMNVPDMML	m	030-034	Emergency	positive	negative	discordant	21	21	Symptomatic	No	1	fever, cough
IZRYHLXXBTIT	m	040-044	Emergency	negative	negative	concordant	-	-	-	-
DAKIIBUCTBGS	f	035-039	Emergency	negative	negative	concordant	-	-	-	-
KJTURWPOZDTC	m	035-039	Emergency	negative	negative	concordant	-	-	-	-
NYPCNYEJBDJR	f	070-074	Emergency	negative	negative	concordant	-	-	-	-
RTABQSRFZNWD	m	080-084	Emergency	negative	negative	concordant	-	-	-	-
FXNKNMWEHODC	m	025-029	Emergency	negative	negative	concordant	-	-	-	-
SEIAPTSDVWMM	f	085-089	Emergency	negative	negative	concordant	-	-	-	-
GFVIVHTALTHL	m	060-064	Emergency	negative	negative	concordant	-	-	-	-
CBBHEIPBPHBV	f	020-024	Emergency	negative	negative	concordant	-	-	-	-
OSVJHZUMYYTR	f	080-084	Emergency	negative	negative	concordant	-	-	-	-
ZJZNNOUWHMEU	f	070-074	Infectious disease	negative	negative	concordant	-	-	-	-
ZWTOJDTHRAJF	m	080-084	Infectious disease	negative	negative	concordant	-	-	-	-
FFDNSSQMBDQU	m	085-089	Infectious disease	negative	negative	concordant	-	-	-	-
VVZZELMRFUWU	m	055-059	Emergency	negative	negative	concordant	-	-	-	-
JEQHJWYZSOEK	m	025-029	Infectious disease	negative	negative	concordant	-	-	-	-
TRPESUEVHPPM	f	035-039	Emergency	negative	negative	concordant	-	-	-	-
LXEVUJHFEVJF	f	075-079	Emergency	negative	negative	concordant	-	-	-	-
TBWAVXCUQFDQ	f	090-094	Emergency	negative	negative	concordant	-	-	-	-
QNDGFICWTLAF	f	095-099	Emergency	negative	negative	concordant	-	-	-	-
XRNQVAHTZYES	m	040-044	Emergency	negative	negative	concordant	-	-	-	-
OVEMESQCJKLK	m	085-089	Emergency	positive	positive	concordant	11.6	11.9	Symptomatic	Yes	2	fever
LKXYGGHRBAHU	f	030-034	Emergency	negative	negative	concordant	-	-	-	-
QUYMXRPGNKUF	f	085-089	Emergency	negative	negative	concordant	-	-	-	-
EENTUXGVWRXP	m	060-064	Emergency	negative	negative	concordant	-	-	-	-
MGMBDEQDWDNR	m	075-079	Emergency	negative	negative	concordant	-	-	-	-
FOBFIMXQYEXV	f	070-074	Infectious disease	negative	negative	concordant	-	-	-	-
EDINWNBPBCYW	f	030-034	Emergency	negative	negative	concordant	-	-	-	-
FWYXLVKBFWLO	m	030-034	Emergency	negative	negative	concordant	-	-	-	-
DWZNEVBIIQNO	f	080-084	Emergency	negative	negative	concordant	-	-	-	-
BQXIZKKRGFGI	m	035-039	Infectious disease	negative	negative	concordant	-	-	-	-
LMILQZRMPRJY	m	065-069	Emergency	negative	negative	concordant	-	-	-	-
MGRJMCCHDJTU	m	080-084	Emergency	negative	negative	concordant	-	-	-	-
RBHFLZMKITPB	m	075-079	Infectious disease	negative	negative	concordant	-	-	-	-
XNSZSQLGHQPW	m	075-079	Emergency	negative	negative	concordant	-	-	-	-
BEUTZWCZJCHC	f	070-074	Infectious disease	negative	negative	concordant	-	-	-	-
VBGHQKXVMSPA	f	025-029	Emergency	negative	negative	concordant	-	-	-	-
NCOYCQCUMZYR	f	075-079	Emergency	negative	negative	concordant	-	-	-	-
VABGZUVSSCYD	m	085-089	Infectious disease	negative	negative	concordant	-	-	-	-
MVRMZCWPRIYV	f	085-089	Infectious disease	negative	negative	concordant	-	-	-	-
LCXTPTFATBFL	m	065-069	Emergency	negative	negative	concordant	-	-	-	-
AFGWOGSFBBBX	m	065-069	Emergency	negative	negative	concordant	-	-	-	-
IXPQTPWIPLKB	f	060-064	Emergency	negative	negative	concordant	-	-	-	-
QXQMNGLBIDCI	f	080-084	Infectious disease	negative	negative	concordant	-	-	-	-
RNMSAEFTMVCT	m	080-084	Infectious disease	negative	negative	concordant	-	-	-	-
UUJZCSMMVCIV	f	085-089	Emergency	negative	negative	concordant	-	-	-	-
EWKQWTBHBDFB	f	090-094	Infectious disease	negative	negative	concordant	-	-	-	-
NCYMMDITXHFB	m	020-024	Emergency	negative	negative	concordant	-	-	-	-
YHMOWCBDYIHU	m	060-064	Emergency	negative	negative	concordant	-	-	-	-
DVVLEXXEJBIQ	f	075-079	Emergency	negative	negative	concordant	-	-	-	-
RBGTJSDJNTDW	f	090-094	Emergency	negative	negative	concordant	-	-	-	-
YAVKPVQKZQPF	f	080-084	Emergency	negative	negative	concordant	-	-	-	-
GJEHWGFWFOLL	m	085-089	Emergency	negative	negative	concordant	-	-	-	-
EWGEFOLVWKBS	m	080-084	Emergency	negative	negative	concordant	-	-	-	-
FBXLDMYXHQIR	m	075-079	Emergency	negative	negative	concordant	-	-	-	-
EAHVYGRXZBRD	m	090-094	Emergency	negative	negative	concordant	-	-	-	-
NTWCJYJMIQRN	m	030-034	Emergency	negative	negative	concordant	-	-	-	-
PJSEEZTSMCTY	m	035-039	Emergency	negative	negative	concordant	-	-	-	-
HCHAOZETPXPW	m	055-059	Infectious disease	negative	negative	concordant	-	-	-	-
KYEBESDTUIZE	f	045-049	Emergency	negative	negative	concordant	-	-	-	-
OPBSWZSPCYRI	f	020-024	Emergency	negative	negative	concordant	-	-	-	-
IGAOJOBMPIXA	m	070-074	Infectious disease	negative	negative	concordant	-	-	-	-
XKTUOBXXGXZK	f	090-094	Infectious disease	negative	negative	concordant	-	-	-	-
IHNCDEXVVFWT	m	025-029	Emergency	negative	negative	concordant	-	-	-	-
JHFIEPORXFPB	m	075-079	Emergency	negative	negative	concordant	-	-	-	-
GXXSDBYNHODW	m	085-089	Emergency	negative	negative	concordant	-	-	-	-
JNBRXXTLJODM	f	090-094	Emergency	negative	negative	concordant	-	-	-	-
IEOHXRMVIDCL	m	075-079	Emergency	negative	negative	concordant	-	-	-	-
HQXJXUFOMCYF	m	055-059	Emergency	negative	negative	concordant	-	-	-	-
HZKGODHTACSQ	m	035-039	Emergency	negative	negative	concordant	-	-	-	-
EOTTXRQXBIXV	m	050-054	Emergency	negative	negative	concordant	-	-	-	-
UOSIJSETMGUO	m	075-079	Emergency	negative	negative	concordant	-	-	-	-
FSIOBDQGATOZ	m	080-084	Infectious disease	negative	negative	concordant	-	-	-	-
QBJPXQIUQXPV	m	075-079	Emergency	negative	negative	concordant	-	-	-	-
VRZKPXCBHTUP	m	070-074	Emergency	negative	negative	concordant	-	-	-	-
JKNGUXZXCUCG	m	035-039	Emergency	positive	negative	discordant	17	NA	Symptomatic	Yes	10	fever
IMSKFKVKCKHX	f	020-024	Emergency	negative	negative	concordant	-	-	-	-
YPSBQDIRUUYG	m	020-024	Emergency	negative	negative	concordant	-	-	-	-
EBFEVWSROERZ	m	060-064	Emergency	negative	negative	concordant	-	-	-	-
CDZWSKOWCBYK	m	050-054	Emergency	negative	negative	concordant	-	-	-	-
MFPZEXZEXNBR	m	055-059	Emergency	negative	negative	concordant	-	-	-	-
ZSUSTWOZYNLA	m	085-089	Emergency	negative	negative	concordant	-	-	-	-
BQNOPVJYZUOX	f	030-034	Emergency	negative	negative	concordant	-	-	-	-
SUFZPJPRLONI	m	065-069	Emergency	negative	negative	concordant	-	-	-	-
PRQOBIOHXPPD	f	070-074	Emergency	negative	negative	concordant	-	-	-	-
EPBBQCRIRMOA	f	080-084	Emergency	negative	negative	concordant	-	-	-	-
QAQIEKWDPEQW	f	080-084	Emergency	positive	negative	discordant	23.2	23.7	Symptomatic	Yes	3	asthenia, cough
NWHBPOOYBGCY	f	050-054	Emergency	negative	negative	concordant	-	-	-	-
RRFLHRWMGBAK	m	050-054	Emergency	negative	negative	concordant	-	-	-	-
RXZZVGSGAEBF	m	080-084	Emergency	negative	negative	concordant	-	-	-	-
OAPQHGDYTDZR	f	080-084	Emergency	negative	negative	concordant	-	-	-	-
VPZYORABBAIE	f	090-094	Emergency	negative	negative	concordant	-	-	-	-
ZVJQLMJBLGLM	m	065-069	Emergency	positive	negative	discordant	32	32	Symptomatic	Yes	0	chest pain, fever
VHLOFABPMDTV	m	090-094	Emergency	negative	negative	concordant	-	-	-	-
BVMOBMHPHAOT	m	025-029	Infectious disease	negative	negative	concordant	-	-	-	-
TXIVWCWFBHMT	f	055-059	Infectious disease	negative	negative	concordant	-	-	-	-
VPCFAYXPUERD	f	080-084	Emergency	negative	negative	concordant	-	-	-	-
ZYFNNQMKOXZH	f	030-034	Emergency	negative	negative	concordant	-	-	-	-
QALOMUFDPDLN	m	080-084	Emergency	negative	negative	concordant	-	-	-	-
AJHCTANYWVOV	f	065-069	Emergency	negative	negative	concordant	-	-	-	-
XYPXMVWAYYPC	f	085-089	Infectious disease	negative	negative	concordant	-	-	-	-
MUNKDCIZGTGO	m	090-094	Emergency	positive	positive	concordant	16	17	Symptomatic	Yes	3	cough, dyspnea
THDJTNUHQLWQ	f	085-089	Emergency	positive	positive	concordant	17	18	Symptomatic	Yes	0	asthenia, dyspnea
KVDGQFREHFWO	f	090-094	Emergency	negative	negative	concordant	-	-	-	-
YXYHEFEHNOGO	f	075-079	Emergency	negative	negative	concordant	-	-	-	-
CYYEKIJJBGAD	m	065-069	Infectious disease	negative	negative	concordant	-	-	-	-
WHPBVAMLMFSW	f	060-064	Emergency	negative	negative	concordant	-	-	-	-
UOLOYWWYQXGU	f	045-049	Infectious disease	negative	negative	concordant	-	-	-	-
HVFJJEGAMKSH	m	090-094	Emergency	negative	negative	concordant	-	-	-	-
XSMQQTGUQIWZ	f	090-094	Emergency	negative	negative	concordant	-	-	-	-
XSMQQTGUQIWZ	f	090-094	Emergency	negative	negative	concordant	-	-	-	-
AKIKQOZZIFQL	f	075-079	Emergency	negative	negative	concordant	-	-	-	-
IANPWUIVMMJH	m	070-074	Emergency	negative	negative	concordant	-	-	-	-
GSNZGCHJTCMN	f	085-089	Emergency	negative	negative	concordant	-	-	-	-
XZMMPERHMIOY	f	080-084	Emergency	negative	negative	concordant	-	-	-	-
IWXUPUIVLIGP	m	080-084	Emergency	negative	negative	concordant	-	-	-	-
LGSDEDBINWQZ	m	080-084	Infectious disease	negative	negative	concordant	-	-	-	-
SUERXEFNVEHR	f	020-024	Emergency	negative	negative	concordant	-	-	-	-
WCDGQFASPDTQ	f	080-084	Emergency	negative	negative	concordant	-	-	-	-
IFQJMKHIHFHN	f	020-024	Emergency	negative	negative	concordant	-	-	-	-
NMALSXZGUFUH	f	050-054	Emergency	negative	negative	concordant	-	-	-	-
YFUUDDGICHYN	f	055-059	Emergency	negative	negative	concordant	-	-	-	-
AWCSPVMDSJRD	m	075-079	Emergency	negative	negative	concordant	-	-	-	-
OCHGOCNWKPQF	m	030-034	Emergency	negative	negative	concordant	-	-	-	-
YBPTWLTVIHEI	m	045-049	Emergency	negative	negative	concordant	-	-	-	-
ZLZJOXMWHDBU	m	070-074	Emergency	negative	negative	concordant	-	-	-	-
KWTIBMVNNGOC	m	090-094	Emergency	negative	negative	concordant	-	-	-	-
GDHATZMQBKQY	f	055-059	Emergency	negative	negative	concordant	-	-	-	-
MPCSUAPDVKEX	m	080-084	Infectious disease	negative	negative	concordant	-	-	-	-
HJVUXSBWAYSB	f	035-039	Emergency	negative	negative	concordant	-	-	-	-
GRIWLFPMKPHO	m	090-094	Emergency	negative	negative	concordant	-	-	-	-
EMJVNWLOGNGP	f	090-094	Emergency	negative	negative	concordant	-	-	-	-
LNOENMZYQWDF	f	080-084	Emergency	negative	negative	concordant	-	-	-	-
KGFXOVJKYKXS	f	035-039	Emergency	negative	negative	concordant	-	-	-	-
VLIKVARDZXKU	f	075-079	Emergency	negative	negative	concordant	-	-	-	-
DEUCKBNFCOFR	f	085-089	Infectious disease	negative	negative	concordant	-	-	-	-
RLHDCJEWBORI	f	065-069	Emergency	negative	negative	concordant	-	-	-	-
QBUVHTCDFJLZ	m	045-049	Infectious disease	negative	negative	concordant	-	-	-	-
XVEEAWECYYYW	m	070-074	Infectious disease	negative	negative	concordant	-	-	-	-
KTKJTIBMZBCI	m	080-084	Emergency	negative	negative	concordant	-	-	-	-
YXVANBGSCMEO	f	090-094	Emergency	negative	negative	concordant	-	-	-	-
PYJCJBSIFILP	f	090-094	Emergency	negative	negative	concordant	-	-	-	-
OGEIMODODZNP	m	075-079	Emergency	negative	negative	concordant	-	-	-	-
YENINLCBXQSL	f	075-079	Emergency	negative	negative	concordant	-	-	-	-
IZONZYYXQKFT	m	045-049	Emergency	negative	negative	concordant	-	-	-	-
WKSAFTOGWPDW	f	035-039	Emergency	negative	negative	concordant	-	-	-	-
VREPTQDUYMYE	m	025-029	Emergency	negative	negative	concordant	-	-	-	-
ZHQTIIDUYMUJ	f	045-049	Infectious disease	negative	negative	concordant	-	-	-	-
YEYJUEEYJIPM	m	060-064	Emergency	negative	negative	concordant	-	-	-	-
WYPSRXPKENAK	m	075-079	Emergency	negative	negative	concordant	-	-	-	-
DCTZUWTQRRYE	m	055-059	Infectious disease	negative	negative	concordant	-	-	-	-
LYSVRIDMHTNY	f	085-089	Emergency	negative	negative	concordant	-	-	-	-
GIDVCAPKWXAH	f	035-039	Emergency	negative	negative	concordant	-	-	-	-
GLRLPXIEUVQW	f	035-039	Emergency	positive	positive	concordant	15	15.1	Symptomatic	Yes	0	fever, cough
FHBCGBOMVQNI	m	075-079	Emergency	negative	negative	concordant	-	-	-	-
UYJFCWCUOUKD	f	030-034	Emergency	negative	negative	concordant	-	-	-	-
RXEHMSVZIPHH	f	080-084	Emergency	negative	negative	concordant	-	-	-	-
VBCMTUKOLQIM	f	060-064	Emergency	negative	negative	concordant	-	-	-	-
QFEFLOUZSHXK	f	080-084	Infectious disease	negative	negative	concordant	-	-	-	-
ARNTVCRMCHAC	f	090-094	Emergency	negative	negative	concordant	-	-	-	-
ARNTVCRMCHAC	f	090-094	Emergency	negative	negative	concordant	-	-	-	-
UQWGVXGVETIP	m	020-024	Emergency	negative	negative	concordant	-	-	-	-
BWQTYJQMNEBB	f	075-079	Emergency	negative	negative	concordant	-	-	-	-
JZIHOGJWUBOJ	f	045-049	Emergency	negative	negative	concordant	-	-	-	-
AVXCWAVGMMAO	f	025-029	Emergency	negative	negative	concordant	-	-	-	-
ZTERWRNVLGXS	m	090-094	Emergency	negative	negative	concordant	-	-	-	-
OYWNQERKRHMV	f	075-079	Emergency	negative	negative	concordant	-	-	-	-
MNODQHWQWZIP	f	055-059	Emergency	negative	negative	concordant	-	-	-	-
OCCWBBJZURJL	m	035-039	Emergency	negative	negative	concordant	-	-	-	-
DNOOWPLOXERY	m	035-039	Emergency	negative	negative	concordant	-	-	-	-
VZBBEKPFFQIQ	f	020-024	Emergency	negative	negative	concordant	-	-	-	-
VXTKWNDQHZLD	f	050-054	Emergency	negative	negative	concordant	-	-	-	-
ZTLEMDMNQWKS	f	025-029	Emergency	negative	negative	concordant	-	-	-	-
EMPHKHQTHLBN	m	025-029	Emergency	negative	negative	concordant	-	-	-	-
HSFXQZEOPGYU	f	090-094	Infectious disease	negative	negative	concordant	-	-	-	-
HNWNCWARGSUJ	f	055-059	Emergency	negative	negative	concordant	-	-	-	-
RUIPPNCWZUDH	f	060-064	Emergency	negative	negative	concordant	-	-	-	-
TOZJMDRNMVMX	m	075-079	Emergency	negative	negative	concordant	-	-	-	-
KWJADXDNAVQH	m	065-069	Emergency	negative	negative	concordant	-	-	-	-
SURZHFAUXSMG	f	040-044	Emergency	negative	negative	concordant	-	-	-	-
BKUHJRFBJPIC	m	065-069	Emergency	negative	negative	concordant	-	-	-	-
ZKQCULHOQSJK	f	075-079	Infectious disease	negative	negative	concordant	-	-	-	-
LXOPBFJDDFLX	f	065-069	Emergency	negative	negative	concordant	-	-	-	-
IKCKQCQQSBOH	m	085-089	Emergency	negative	negative	concordant	-	-	-	-
IGIPCERGGCMK	m	070-074	Emergency	negative	negative	concordant	-	-	-	-
OCROGEHRVHKK	f	065-069	Emergency	negative	negative	concordant	-	-	-	-
NWUQQXSPYHKJ	f	050-054	Emergency	negative	negative	concordant	-	-	-	-
ZDEGJHZWUQAZ	m	095-099	Infectious disease	negative	negative	concordant	-	-	-	-
VBRYBKUMYWYF	m	080-084	Emergency	negative	negative	concordant	-	-	-	-
THKZNJKDGEGZ	m	030-034	Emergency	positive	positive	concordant	19.4	19.9	Symptomatic	No	5	fever, myalgia
JDMLQIRZTOST	f	090-094	Infectious disease	negative	negative	concordant	-	-	-	-
MBJNZYYRJTHX	m	090-094	Infectious disease	negative	negative	concordant	-	-	-	-
WTVVPKRCFBHN	f	060-064	Emergency	negative	negative	concordant	-	-	-	-
MWLXPKKVKHQR	f	050-054	Emergency	negative	negative	concordant	-	-	-	-
YIOTQUEKYHZJ	f	075-079	Emergency	negative	negative	concordant	-	-	-	-
GAFUXKWOPFHB	f	050-054	Emergency	negative	negative	concordant	-	-	-	-
FUYZLSOOUHGB	m	055-059	Infectious disease	negative	negative	concordant	-	-	-	-
YAICLCXJROXM	m	025-029	Emergency	negative	negative	concordant	-	-	-	-
TLBRYSBNQAIZ	m	075-079	Emergency	negative	negative	concordant	-	-	-	-
FNIHNNUTKYTH	m	065-069	Infectious disease	negative	negative	concordant	-	-	-	-
QLKPIXYXAJNR	m	040-044	Emergency	positive	negative	discordant	19.8	20.2	Symptomatic	No	0	asthenia
GEIOAUYLUQIG	m	045-049	Emergency	positive	negative	discordant	38	NA	Symptomatic	Yes	7	headache
UWWFPZOFJSNH	f	080-084	Emergency	negative	negative	concordant	-	-	-	-
UWWFPZOFJSNH	f	080-084	Emergency	negative	negative	concordant	-	-	-	-
VMRCCBURNNQT	m	065-069	Emergency	negative	negative	concordant	-	-	-	-
QBYOOIKZRIKL	m	020-024	Emergency	negative	negative	concordant	-	-	-	-
ZHLALOHBGVVE	m	060-064	Emergency	negative	negative	concordant	-	-	-	-
RJGCCOPABYGJ	f	020-024	Emergency	negative	negative	concordant	-	-	-	-
MGYHFFAKBNJJ	m	045-049	Emergency	negative	negative	concordant	-	-	-	-
IHYEXEVQKXAA	f	050-054	Emergency	negative	negative	concordant	-	-	-	-
HOOLEFVDGDCB	f	080-084	Emergency	negative	negative	concordant	-	-	-	-
XNRIVVABNHAP	m	045-049	Emergency	negative	negative	concordant	-	-	-	-
RHBOVBWYWABT	f	080-084	Emergency	negative	negative	concordant	-	-	-	-
YHSAFVBCGFSO	m	065-069	Emergency	negative	negative	concordant	-	-	-	-
OSCDXEDJASQC	f	090-094	Emergency	negative	negative	concordant	-	-	-	-
LTUYYHIVKYMO	f	060-064	Emergency	negative	negative	concordant	-	-	-	-
TSWJOAWLIEGD	m	070-074	Infectious disease	negative	negative	concordant	-	-	-	-
JDBTLNLEKOEN	f	080-084	Emergency	negative	negative	concordant	-	-	-	-
SLGLLLNSVTBC	f	085-089	Emergency	negative	negative	concordant	-	-	-	-
PVOSZMZCHPIY	m	085-089	Infectious disease	negative	negative	concordant	-	-	-	-
KFDVLLATIAFA	m	065-069	Emergency	negative	negative	concordant	-	-	-	-
CHENMCIBLBRP	m	065-069	Emergency	negative	negative	concordant	-	-	-	-
BKEXMUAHSAFN	m	045-049	Emergency	negative	negative	concordant	-	-	-	-
ATMEBHENUBJM	f	035-039	Emergency	negative	negative	concordant	-	-	-	-
CYXASUIVMQOK	m	070-074	Emergency	negative	negative	concordant	-	-	-	-
AAIYYPKGSUOB	f	055-059	Emergency	negative	negative	concordant	-	-	-	-
ILOJYXZSXFVC	m	025-029	Emergency	negative	negative	concordant	-	-	-	-
OSSZPEUSRESI	f	040-044	Emergency	negative	negative	concordant	-	-	-	-
IPTODLQZEDSB	f	080-084	Emergency	negative	negative	concordant	-	-	-	-
EMUOZXGPYLUT	m	035-039	Emergency	negative	negative	concordant	-	-	-	-
BLYYQSYTKNLM	f	090-094	Emergency	negative	negative	concordant	-	-	-	-
CDPDNGRZTTJK	f	075-079	Emergency	negative	negative	concordant	-	-	-	-
GMTALFIGCPMU	f	020-024	Emergency	negative	negative	concordant	-	-	-	-
CUDHQBNNQJUW	m	085-089	Emergency	negative	negative	concordant	-	-	-	-
BQMMEVWLMFMO	f	035-039	Emergency	negative	negative	concordant	-	-	-	-
HJEMCVRKFTMO	f	080-084	Emergency	negative	negative	concordant	-	-	-	-
MJUEHVCSYHDM	f	030-034	Emergency	negative	negative	concordant	-	-	-	-
QTHASEOSFRFK	m	060-064	Emergency	negative	negative	concordant	-	-	-	-
QDIRYFXMSORT	f	095-099	Infectious disease	negative	negative	concordant	-	-	-	-
YZTOKINQHHXX	m	070-074	Emergency	negative	negative	concordant	-	-	-	-
RMNTDMGCPPVR	f	030-034	Emergency	negative	negative	concordant	-	-	-	-
AWAWFWFXEPCV	f	045-049	Emergency	negative	negative	concordant	-	-	-	-
WFJNBDXZMGGZ	f	050-054	Infectious disease	negative	negative	concordant	-	-	-	-
WLNFTQHWGAXI	f	065-069	Emergency	negative	negative	concordant	-	-	-	-
BVEWNUYCIBLG	m	040-044	Emergency	negative	negative	concordant	-	-	-	-
GVHJNIHAFTZM	f	020-024	Emergency	negative	negative	concordant	-	-	-	-
HMHCQZSFBBKY	m	085-089	Emergency	negative	negative	concordant	-	-	-	-
NSCRIYZQYHUM	m	060-064	Infectious disease	negative	negative	concordant	-	-	-	-
KPICHWOTNVHM	m	045-049	Emergency	negative	negative	concordant	-	-	-	-
JKYNEGJVELEW	f	080-084	Emergency	negative	negative	concordant	-	-	-	-
DGLYFWHTDQOG	f	070-074	Infectious disease	negative	negative	concordant	-	-	-	-
SBQRZARPCSPS	f	085-089	Emergency	negative	negative	concordant	-	-	-	-
ODAQVKBDATKV	m	090-094	Emergency	negative	negative	concordant	-	-	-	-
OMJHIYMOOGTH	m	085-089	Infectious disease	negative	negative	concordant	-	-	-	-
JROUNZBXLBKU	f	080-084	Emergency	negative	negative	concordant	-	-	-	-
KDZQDYNOCYVS	f	030-034	Emergency	negative	negative	concordant	-	-	-	-
VRHIIPCWVGTX	m	080-084	Emergency	negative	negative	concordant	-	-	-	-
AOCKOWHYMVQC	f	090-094	Emergency	negative	negative	concordant	-	-	-	-
PGJBVAQQQWBT	f	050-054	Infectious disease	negative	negative	concordant	-	-	-	-
FIVXNCRQGQFS	f	085-089	Emergency	negative	negative	concordant	-	-	-	-
MINTXRSPYRMR	m	075-079	Emergency	negative	negative	concordant	-	-	-	-
YLSPRXMTROPF	f	080-084	Infectious disease	negative	negative	concordant	-	-	-	-
YBTWELPNXLIG	m	075-079	Emergency	negative	negative	concordant	-	-	-	-
XOMLYJRFBLMC	m	055-059	Emergency	negative	negative	concordant	-	-	-	-
JTENEXGOSXXZ	m	065-069	Infectious disease	negative	negative	concordant	-	-	-	-
LDXPNMRLUPAV	f	065-069	Emergency	negative	negative	concordant	-	-	-	-
DXGTLOWRRULU	f	080-084	Infectious disease	negative	negative	concordant	-	-	-	-
CGQNRILKIJQK	m	080-084	Infectious disease	negative	negative	concordant	-	-	-	-
FPVAKYXJERFK	m	070-074	Emergency	negative	negative	concordant	-	-	-	-
VTNBRWIMACLS	f	080-084	Infectious disease	negative	negative	concordant	-	-	-	-
IEFWBYOBMBGE	m	025-029	Emergency	negative	negative	concordant	-	-	-	-
JCTCJXNYUHFE	m	030-034	Infectious disease	negative	negative	concordant	-	-	-	-
MMBRQCFVVGDO	f	085-089	Emergency	negative	negative	concordant	-	-	-	-
JFJQVXSPBZYA	f	070-074	Infectious disease	negative	negative	concordant	-	-	-	-
FWEFSYMBZJUB	f	055-059	Emergency	negative	negative	concordant	-	-	-	-
ICUGNNTJLEHB	f	090-094	Emergency	negative	negative	concordant	-	-	-	-
RJFTSKXTMDCT	m	075-079	Emergency	negative	negative	concordant	-	-	-	-
PJGDWXZAWTYI	f	055-059	Emergency	negative	negative	concordant	-	-	-	-
KRHLUCVETVYY	m	080-084	Emergency	positive	positive	concordant	11.7	12.2	Symptomatic	Yes	0	fever, asthenia
TVQJYVAAFBSN	f	055-059	Emergency	negative	negative	concordant	-	-	-	-
XWWXHGIZLEIN	m	080-084	Emergency	negative	negative	concordant	-	-	-	-
SATTWWLRLFYD	m	095-099	Infectious disease	negative	negative	concordant	-	-	-	-
BIEACLWRBWIC	m	070-074	Emergency	negative	negative	concordant	-	-	-	-
ZHEFFBXEVLBN	f	030-034	Emergency	negative	negative	concordant	-	-	-	-
OPRTJGCIMDVA	f	075-079	Emergency	negative	negative	concordant	-	-	-	-
RQBCJFBDMNSU	m	060-064	Emergency	negative	negative	concordant	-	-	-	-
WXGEDAYLFBSM	m	080-084	Infectious disease	negative	negative	concordant	-	-	-	-
SWXKNLSWHRSI	m	045-049	Emergency	negative	negative	concordant	-	-	-	-
QWLCVSLLDQUY	m	065-069	Emergency	negative	negative	concordant	-	-	-	-
PQDCMCKIOWWM	m	030-034	Emergency	negative	negative	concordant	-	-	-	-
VYBUAASCHBEK	f	075-079	Infectious disease	negative	negative	concordant	-	-	-	-
TGHMXLPRTPUN	f	030-034	Infectious disease	negative	negative	concordant	-	-	-	-
DYXUFPAFQYGJ	f	045-049	Emergency	negative	negative	concordant	-	-	-	-
DJGQZJSIXSMV	f	085-089	Emergency	negative	negative	concordant	-	-	-	-
ROKMWWKLTJJS	f	065-069	Emergency	negative	negative	concordant	-	-	-	-
VCPYPIBJWTBY	m	085-089	Infectious disease	negative	negative	concordant	-	-	-	-
FRPXQJJOFZQI	f	020-024	Emergency	negative	negative	concordant	-	-	-	-
YNRJWHJCNQKE	f	085-089	Emergency	negative	negative	concordant	-	-	-	-
ILXHTYEXDVGC	m	050-054	Infectious disease	negative	negative	concordant	-	-	-	-
CVGPUHMJCYFG	f	070-074	Infectious disease	negative	negative	concordant	-	-	-	-
OOFALVDMELRN	m	060-064	Emergency	negative	negative	concordant	-	-	-	-
OTDDFGGMLQPO	f	075-079	Infectious disease	negative	negative	concordant	-	-	-	-
PAHTEXBYCEBU	m	070-074	Emergency	negative	negative	concordant	-	-	-	-
NZCGLHFBLRVC	m	045-049	Emergency	negative	negative	concordant	-	-	-	-
EBZXJIUFIPVG	f	090-094	Emergency	negative	negative	concordant	-	-	-	-
PYSGLSGJMXWY	f	045-049	Infectious disease	negative	negative	concordant	-	-	-	-
DMWLFZOYPRAD	f	085-089	Emergency	negative	negative	concordant	-	-	-	-
EOBTHGAPVWSO	f	045-049	Emergency	negative	negative	concordant	-	-	-	-
WJFYPTMKRPRD	f	075-079	Emergency	negative	negative	concordant	-	-	-	-
ZOSVKJNPPKVD	m	060-064	Emergency	negative	negative	concordant	-	-	-	-
QOHENNGSSJBH	m	050-054	Infectious disease	negative	negative	concordant	-	-	-	-
CBZDAMCONIMG	m	070-074	Emergency	negative	negative	concordant	-	-	-	-
MBLHHHNFOZZL	m	085-089	Emergency	negative	negative	concordant	-	-	-	-
LTYKELFRLHKF	m	095-099	Emergency	negative	negative	concordant	-	-	-	-
AEGZOBXNRHMJ	f	075-079	Emergency	negative	negative	concordant	-	-	-	-
KXNUKIGGDHDC	f	045-049	Emergency	negative	negative	concordant	-	-	-	-
ATSGQHCLLPPA	f	080-084	Emergency	negative	negative	concordant	-	-	-	-
PCBGVNWYTWVC	f	090-094	Emergency	negative	negative	concordant	-	-	-	-
UBGCNLAUJDLJ	f	050-054	Emergency	negative	negative	concordant	-	-	-	-
LIOZXMGSRJWJ	f	085-089	Emergency	negative	negative	concordant	-	-	-	-
MIJPIABVYOKZ	m	075-079	Emergency	negative	negative	concordant	-	-	-	-
NDUHKWJHKKHA	m	080-084	Emergency	negative	negative	concordant	-	-	-	-
PBIFNLHZEJVU	f	040-044	Emergency	negative	negative	concordant	-	-	-	-
DZHEFKPXLPIW	f	070-074	Emergency	negative	negative	concordant	-	-	-	-
INSRCWSICZGJ	f	090-094	Emergency	negative	negative	concordant	-	-	-	-
XEPWVPWCBKTK	f	090-094	Infectious disease	negative	negative	concordant	-	-	-	-
DIGAAUHYPTNC	f	080-084	Infectious disease	negative	negative	concordant	-	-	-	-
GPNNMPWNWXJM	f	080-084	Emergency	negative	negative	concordant	-	-	-	-
OBAEEWAGTDZG	m	080-084	Emergency	negative	negative	concordant	-	-	-	-
RWRVGCURVRAI	m	085-089	Infectious disease	negative	negative	concordant	-	-	-	-
YCGCDTVHLJMM	m	070-074	Emergency	negative	negative	concordant	-	-	-	-
DXOEMCZGLXHP	f	085-089	Emergency	negative	negative	concordant	-	-	-	-
YSTIBIJYLKVT	f	080-084	Emergency	negative	negative	concordant	-	-	-	-
PSCZCBPFIPQX	f	090-094	Emergency	negative	negative	concordant	-	-	-	-
SBMOIWRGKOBL	f	045-049	Emergency	negative	negative	concordant	-	-	-	-
LMIWPWMUPUHU	m	030-034	Emergency	negative	negative	concordant	-	-	-	-
WNFLBXAQUMHM	f	055-059	Emergency	negative	negative	concordant	-	-	-	-
FRWOHEFQUOJN	m	070-074	Emergency	negative	negative	concordant	-	-	-	-
GRBXQKIYBTIZ	f	035-039	Emergency	negative	negative	concordant	-	-	-	-
BSJVEAWRMRDG	f	090-094	Emergency	negative	negative	concordant	-	-	-	-
SXZEQZPWMMYN	f	020-024	Emergency	negative	negative	concordant	-	-	-	-
SODMSJKZTBIA	f	075-079	Emergency	negative	negative	concordant	-	-	-	-
JRWSCYBRRVSY	m	070-074	Emergency	negative	negative	concordant	-	-	-	-
QIANCTLEHQAP	m	080-084	Emergency	negative	negative	concordant	-	-	-	-
CKCDQRPBDGMA	f	095-099	Infectious disease	negative	negative	concordant	-	-	-	-
PHOUKBFMUHLR	f	075-079	Infectious disease	negative	negative	concordant	-	-	-	-
TOXZUFGZMQGO	f	090-094	Emergency	negative	negative	concordant	-	-	-	-
YHWAVRTKNHOA	m	030-034	Emergency	negative	negative	concordant	-	-	-	-
GDLCQVXSXDVY	m	065-069	Emergency	negative	negative	concordant	-	-	-	-
KLKCBEMGWYEB	m	070-074	Emergency	negative	negative	concordant	-	-	-	-
GVAARXBVBDZY	m	050-054	Emergency	negative	negative	concordant	-	-	-	-
ZKYQGCQAWTCC	m	085-089	Emergency	negative	negative	concordant	-	-	-	-
XQNKYEGCDFDQ	f	060-064	Emergency	negative	negative	concordant	-	-	-	-
VOHIFEKEWPYG	f	080-084	Infectious disease	negative	negative	concordant	-	-	-	-
JQRXVGOANWYU	f	080-084	Emergency	negative	negative	concordant	-	-	-	-
ARASGQEOBWCC	m	085-089	Infectious disease	negative	negative	concordant	-	-	-	-
JUKRSYSXIXQE	f	070-074	Infectious disease	negative	negative	concordant	-	-	-	-
NDVJCLASBBIV	m	080-084	Emergency	negative	negative	concordant	-	-	-	-
GDXGBLCIEKDG	f	045-049	Emergency	negative	negative	concordant	-	-	-	-
JFMCNLZOMYHY	m	085-089	Emergency	negative	negative	concordant	-	-	-	-
LUDNFMUWKTFL	m	085-089	Emergency	negative	negative	concordant	-	-	-	-
CKRYSUMRGCIA	f	055-059	Emergency	negative	negative	concordant	-	-	-	-
RZXXDIIZJSIO	m	070-074	Emergency	negative	negative	concordant	-	-	-	-
BTKQBHXTNTUK	f	080-084	Emergency	negative	negative	concordant	-	-	-	-
DBFYYQGXJTSZ	f	065-069	Emergency	negative	negative	concordant	-	-	-	-
LZEXXCRIHRII	f	085-089	Emergency	negative	negative	concordant	-	-	-	-
WQDJQCIWDDYV	f	085-089	Infectious disease	negative	negative	concordant	-	-	-	-
XTIDOSHLIEVK	m	090-094	Emergency	negative	negative	concordant	-	-	-	-
BIXHSOEVEPCF	m	055-059	Emergency	negative	negative	concordant	-	-	-	-
QRWODUHDCOWX	f	080-084	Emergency	negative	negative	concordant	-	-	-	-
ZMRWCZHYAQGS	f	030-034	Emergency	negative	negative	concordant	-	-	-	-
LPEHRGKQCUXU	m	075-079	Emergency	negative	negative	concordant	-	-	-	-
YSSTTWXPXLXV	f	070-074	Emergency	negative	negative	concordant	-	-	-	-
OXFTIRDIEDNN	m	065-069	Emergency	negative	negative	concordant	-	-	-	-
UOROUOXWARUY	f	045-049	Infectious disease	negative	negative	concordant	-	-	-	-
PZTRBBHHFWNP	f	060-064	Emergency	negative	negative	concordant	-	-	-	-
XFNRMPLHUOQW	m	085-089	Emergency	negative	negative	concordant	-	-	-	-
JKXGXPFCQTTZ	f	085-089	Emergency	negative	negative	concordant	-	-	-	-
WWQHSFBOTGHH	m	055-059	Infectious disease	negative	negative	concordant	-	-	-	-
USUBLGKSYIBF	f	095-099	Emergency	negative	negative	concordant	-	-	-	-
TRGYAXKLFCRO	m	050-054	Emergency	negative	negative	concordant	-	-	-	-
VBBBSSDGMVDK	m	085-089	Emergency	negative	negative	concordant	-	-	-	-
XRFIPRFWNXGB	f	090-094	Infectious disease	negative	negative	concordant	-	-	-	-
SIWIZLYHADOJ	f	060-064	Emergency	negative	negative	concordant	-	-	-	-
WDXZCQLNYBXQ	f	055-059	Emergency	negative	negative	concordant	-	-	-	-
ZOZGDPRHHJJO	f	075-079	Emergency	positive	positive	concordant	24.1	24.3	Symptomatic	Yes	0	fever
HRLHSXQXMAAK	m	085-089	Emergency	negative	negative	concordant	-	-	-	-
IQBWVAUVGWOS	m	055-059	Emergency	negative	negative	concordant	-	-	-	-
RHSCFHCLXAKH	f	055-059	Emergency	negative	negative	concordant	-	-	-	-
QSYWEUETHHTA	f	095-099	Emergency	negative	negative	concordant	-	-	-	-
MNMHAICAHRCA	m	085-089	Emergency	negative	negative	concordant	-	-	-	-
ZRJRUZYOUJDR	f	055-059	Emergency	negative	negative	concordant	-	-	-	-
YCRIYIOGRPYG	f	080-084	Emergency	negative	negative	concordant	-	-	-	-
WWWNVKLEEAAW	m	050-054	Emergency	negative	negative	concordant	-	-	-	-
NKAOJESSPEIB	f	080-084	Infectious disease	negative	negative	concordant	-	-	-	-
SCTLVZRGDBQF	m	085-089	Emergency	negative	negative	concordant	-	-	-	-
QDRJZTUQZCZL	m	080-084	Emergency	negative	negative	concordant	-	-	-	-
ICFXGOIBXWZL	m	025-029	Emergency	negative	negative	concordant	-	-	-	-
BGSQGICGYVSO	m	030-034	Emergency	negative	negative	concordant	-	-	-	-
ODBLOGMGXFBG	m	035-039	Emergency	negative	negative	concordant	-	-	-	-
JMEGOCDYOBIP	m	050-054	Emergency	negative	negative	concordant	-	-	-	-
NJBURBPOHSQR	f	055-059	Emergency	negative	negative	concordant	-	-	-	-
YXBHDUWIIKNM	m	030-034	Emergency	negative	negative	concordant	-	-	-	-
SMJDLYHVYNFN	m	050-054	Emergency	positive	positive	concordant	24	24.3	Asymptomatic	No
YEVSHVFMKNUL	f	085-089	Emergency	negative	negative	concordant	-	-	-	-
VKEWLUHXOUXU	f	030-034	Emergency	negative	negative	concordant	-	-	-	-
JHQUYTHCJMXV	m	050-054	Emergency	negative	negative	concordant	-	-	-	-
VKFQYDOYXPEB	m	045-049	Emergency	negative	negative	concordant	-	-	-	-
LJUCJTBTCEXG	m	085-089	Infectious disease	negative	negative	concordant	-	-	-	-
WJNWTSKQRTYH	m	065-069	Emergency	negative	negative	concordant	-	-	-	-
UFAJRPOOWHBH	m	035-039	Emergency	negative	negative	concordant	-	-	-	-
WANWUMHDCOAC	m	025-029	Emergency	negative	negative	concordant	-	-	-	-
XFIRAJLOHBYF	f	020-024	Emergency	positive	positive	concordant	23	23	Asymptomatic	No
WTNSLRNEGPLL	f	060-064	Emergency	negative	negative	concordant	-	-	-	-
HUCOXUERRUPK	m	055-059	Infectious disease	negative	negative	concordant	-	-	-	-
UVJIORBAAVPQ	m	035-039	Emergency	negative	negative	concordant	-	-	-	-
TMPZWXJTUMYJ	m	025-029	Emergency	negative	negative	concordant	-	-	-	-
ZSNHRYLCEJYQ	m	030-034	Emergency	negative	negative	concordant	-	-	-	-
CHKUOWTWWXBC	m	020-024	Emergency	negative	negative	concordant	-	-	-	-
JPDSORUCDZBT	m	035-039	Infectious disease	negative	negative	concordant	-	-	-	-
ZKJAMQNOIXXQ	f	030-034	Emergency	negative	negative	concordant	-	-	-	-
KGWFDGNLDMZA	m	055-059	Emergency	negative	negative	concordant	-	-	-	-
SXNCHXDQCGGX	m	070-074	Emergency	negative	negative	concordant	-	-	-	-
MOWLRKIDBOBD	m	025-029	Emergency	negative	negative	concordant	-	-	-	-
DXBVDHIEZTSZ	m	030-034	Emergency	positive	positive	concordant	14	15	Symptomatic	No	2	headache
NVFWZZTNHWNR	f	075-079	Emergency	negative	negative	concordant	-	-	-	-
FLFMQZSSIZSN	f	045-049	Emergency	negative	negative	concordant	-	-	-	-
VVBALIAESSKE	m	030-034	Emergency	negative	negative	concordant	-	-	-	-
NWIVPVSUDSSX	f	035-039	Emergency	negative	negative	concordant	-	-	-	-
SSPUSDQASUBR	m	070-074	Emergency	negative	negative	concordant	-	-	-	-
JSSSHIFAVZUL	m	025-029	Infectious disease	negative	negative	concordant	-	-	-	-
WDPRLHUKJLQX	m	085-089	Emergency	negative	negative	concordant	-	-	-	-
UFIXDZIGOERL	f	040-044	Emergency	negative	negative	concordant	-	-	-	-
ZTLDKRLKPUZP	f	075-079	Emergency	negative	negative	concordant	-	-	-	-
HFGFJHHEGRIF	m	020-024	Infectious disease	negative	negative	concordant	-	-	-	-
ZDJKJMDTKTPJ	m	040-044	Emergency	negative	negative	concordant	-	-	-	-
YUKVVQRHJQKQ	f	025-029	Emergency	positive	positive	concordant	17	17	Asymptomatic	No
VKSBGKCEXIAE	f	035-039	Emergency	negative	negative	concordant	-	-	-	-
KMNGRWHXETMQ	f	080-084	Emergency	negative	negative	concordant	-	-	-	-
GLPMXUACZDVU	m	060-064	Emergency	negative	negative	concordant	-	-	-	-
REXJWCBROVMW	m	030-034	Infectious disease	negative	negative	concordant	-	-	-	-
TFVSHIZRRJLH	m	075-079	Emergency	negative	negative	concordant	-	-	-	-
BIGPKIOFWDXI	m	070-074	Emergency	negative	negative	concordant	-	-	-	-
PNERHDEIOGII	f	025-029	Emergency	negative	negative	concordant	-	-	-	-
DBSMRWYRRVKZ	m	030-034	Emergency	negative	negative	concordant	-	-	-	-
YBLJCSNFMFDH	f	080-084	Emergency	negative	negative	concordant	-	-	-	-
ICPTMAXKJKGW	m	035-039	Emergency	negative	negative	concordant	-	-	-	-
XVGUKETRSHRF	f	035-039	Emergency	negative	negative	concordant	-	-	-	-
QKFBIAIQNAMH	m	065-069	Emergency	negative	negative	concordant	-	-	-	-
ZQCDDXSFMCAP	f	085-089	Emergency	negative	negative	concordant	-	-	-	-
QLILKJXIUTSQ	m	090-094	Infectious disease	negative	negative	concordant	-	-	-	-
PLEGPXFDUMCC	f	025-029	Emergency	negative	negative	concordant	-	-	-	-
UDYXYFNGBYUL	m	040-044	Emergency	negative	negative	concordant	-	-	-	-
TRZOLZYVRUGZ	m	065-069	Emergency	negative	negative	concordant	-	-	-	-
CJLDPJXHTMXO	f	050-054	Emergency	negative	negative	concordant	-	-	-	-
LKECRLOBMIWK	f	090-094	Infectious disease	negative	negative	concordant	-	-	-	-
RCVOAWBQJJZC	m	060-064	Emergency	negative	negative	concordant	-	-	-	-
DOOPYHJWMLJY	m	040-044	Emergency	negative	negative	concordant	-	-	-	-
JZBFJIDROELQ	f	035-039	Emergency	negative	negative	concordant	-	-	-	-
DBHXTAQRYXDI	f	090-094	Emergency	negative	negative	concordant	-	-	-	-
KVYPCFXQKFOM	f	080-084	Infectious disease	negative	negative	concordant	-	-	-	-
AQYZAXMIFAAV	m	085-089	Emergency	negative	negative	concordant	-	-	-	-
FTIETPAPOOMF	f	080-084	Infectious disease	negative	negative	concordant	-	-	-	-
GSNCNSXMWITH	f	075-079	Emergency	negative	negative	concordant	-	-	-	-
GFJKEPOLGPFD	f	090-094	Infectious disease	negative	negative	concordant	-	-	-	-
DTZFCEQFUFJN	f	055-059	Emergency	negative	negative	concordant	-	-	-	-
WLJXEVSWVJJZ	m	090-094	Infectious disease	positive	negative	discordant	NA	38.6	Symptomatic	Yes	12	fever
WEQXSCBLCWFD	m	075-079	Emergency	negative	negative	concordant	-	-	-	-
WGPINPCXHCTG	m	050-054	Emergency	negative	negative	concordant	-	-	-	-
MDKDVGPXINHK	f	080-084	Infectious disease	negative	negative	concordant	-	-	-	-
YLNXRUFLQUEM	f	055-059	Emergency	negative	negative	concordant	-	-	-	-
FUPVCGDDKMMF	m	075-079	Emergency	negative	negative	concordant	-	-	-	-
BVNMZBWTPPFV	f	085-089	Emergency	negative	negative	concordant	-	-	-	-
FDYVZCSMDQXL	m	085-089	Infectious disease	negative	negative	concordant	-	-	-	-
XYTSVNVAZESN	m	075-079	Emergency	negative	negative	concordant	-	-	-	-
NBTRFGQEDEFU	f	055-059	Emergency	negative	negative	concordant	-	-	-	-
WFVTBELZSPHF	f	070-074	Emergency	negative	negative	concordant	-	-	-	-
IWJNNYQELPYT	f	055-059	Emergency	negative	negative	concordant	-	-	-	-
VQGZFOUUTRGF	m	060-064	Infectious disease	negative	positive	discordant	NA	NA	Symptomatic	No	0	fever
RYEJCMJCJVKC	m	030-034	Emergency	negative	negative	concordant	-	-	-	-
YVKLAWLANJFK	f	055-059	Emergency	negative	negative	concordant	-	-	-	-
MPVVULQJIHHD	f	090-094	Emergency	negative	negative	concordant	-	-	-	-
VWBFEYBBINTW	f	085-089	Emergency	negative	negative	concordant	-	-	-	-
XGPLUNANMUQD	m	060-064	Emergency	negative	negative	concordant	-	-	-	-
PCGLUYJNUQYJ	f	080-084	Emergency	negative	negative	concordant	-	-	-	-
RESPGTLGOODQ	m	075-079	Infectious disease	negative	negative	concordant	-	-	-	-
YBHONDKGEIBH	f	070-074	Emergency	negative	negative	concordant	-	-	-	-
FJHVCCYCOVPW	m	080-084	Emergency	negative	negative	concordant	-	-	-	-
KJREXKRQQOGS	f	085-089	Emergency	negative	negative	concordant	-	-	-	-
FUMKSXNHLPVK	m	085-089	Emergency	negative	negative	concordant	-	-	-	-
GWLKZTHZIPDF	f	045-049	Emergency	negative	negative	concordant	-	-	-	-
CHHZUQFUCLZX	f	085-089	Emergency	negative	negative	concordant	-	-	-	-
CXKWBHSQSNNO	m	035-039	Emergency	negative	negative	concordant	-	-	-	-
AMNVOKJFOZTA	m	030-034	Emergency	negative	negative	concordant	-	-	-	-
XKDNDBZVXCGZ	f	090-094	Emergency	negative	negative	concordant	-	-	-	-
CFCUVWCEHVIM	f	080-084	Emergency	negative	negative	concordant	-	-	-	-
ZCSMCAMYYDBF	f	080-084	Emergency	negative	negative	concordant	-	-	-	-
QVSOHLMTALTQ	m	065-069	Emergency	negative	negative	concordant	-	-	-	-
HGQJBZZDCPWD	f	080-084	Emergency	negative	negative	concordant	-	-	-	-
NRACCTRWOZAB	f	085-089	Emergency	negative	negative	concordant	-	-	-	-
MUCQXVCWAXQE	m	080-084	Emergency	negative	negative	concordant	-	-	-	-
UGVEKQHRDPFK	f	095-099	Infectious disease	negative	negative	concordant	-	-	-	-
VFIUKVYANWTO	m	080-084	Emergency	negative	negative	concordant	-	-	-	-
KDZNJDLNKSKW	f	090-094	Emergency	negative	negative	concordant	-	-	-	-
TGYFWZWFWAAP	f	075-079	Emergency	negative	negative	concordant	-	-	-	-
CGMWTKQJBZBV	f	085-089	Emergency	negative	negative	concordant	-	-	-	-
MKXMIGNJZNKQ	f	020-024	Infectious disease	negative	negative	concordant	-	-	-	-
ZPEQYNVEXJPD	m	040-044	Emergency	positive	positive	concordant	17.3	18	Asymptomatic	No
DFXAXIYUGKVM	m	025-029	Infectious disease	negative	negative	concordant	-	-	-	-
MKUXKXBQCIQE	m	020-024	Infectious disease	negative	negative	concordant	-	-	-	-
PWERVVAMAUKX	f	090-094	Emergency	negative	negative	concordant	-	-	-	-
KCCJRSBMEZXR	m	060-064	Emergency	negative	negative	concordant	-	-	-	-
EJGXVPJUEJYE	f	080-084	Emergency	negative	negative	concordant	-	-	-	-
LMRTLTNFLHCG	m	080-084	Infectious disease	negative	negative	concordant	-	-	-	-
RXYMVJAUSKXB	f	050-054	Emergency	negative	negative	concordant	-	-	-	-
WNDLILUPHZNG	m	055-059	Emergency	negative	negative	concordant	-	-	-	-
HTPZVORAGKIC	m	065-069	Emergency	positive	negative	discordant	33	37	Symptomatic	Yes	13	fever
FXUVYVUSPZKP	m	090-094	Emergency	negative	negative	concordant	-	-	-	-
SPIOEAXJUPFD	m	035-039	Emergency	negative	negative	concordant	-	-	-	-
VQHPSJJBNVWK	m	080-084	Emergency	negative	negative	concordant	-	-	-	-
QWOBIVCKLZGW	m	050-054	Emergency	negative	negative	concordant	-	-	-	-
QMISISURVOWB	f	075-079	Emergency	negative	negative	concordant	-	-	-	-
FQCREJJPJQVY	m	065-069	Emergency	negative	negative	concordant	-	-	-	-
WYHDJZXBFWRP	f	020-024	Infectious disease	negative	negative	concordant	-	-	-	-
NXPMFWWLUEZM	m	060-064	Emergency	negative	negative	concordant	-	-	-	-
NGFRWNVVTTIC	m	085-089	Emergency	negative	negative	concordant	-	-	-	-
HCKDBVMGOLCA	m	095-099	Emergency	negative	negative	concordant	-	-	-	-
HDOSJUVHFORX	f	045-049	Emergency	negative	negative	concordant	-	-	-	-
BCUOFDPWKSVN	m	075-079	Emergency	negative	negative	concordant	-	-	-	-
RPDVGHXACBNT	m	070-074	Emergency	negative	negative	concordant	-	-	-	-
YRSKWNWLFZUC	f	085-089	Emergency	negative	negative	concordant	-	-	-	-
GDUWINRMCPDP	m	060-064	Emergency	negative	negative	concordant	-	-	-	-
CPMJABHPKYNJ	m	075-079	Infectious disease	negative	negative	concordant	-	-	-	-
GLMMWWUPFDKE	f	085-089	Emergency	negative	negative	concordant	-	-	-	-
EYRSXDFEDNKQ	f	055-059	Emergency	negative	negative	concordant	-	-	-	-
HKOYSKWATWOV	m	055-059	Emergency	negative	negative	concordant	-	-	-	-
RTWYDZXPRAUM	m	080-084	Emergency	negative	negative	concordant	-	-	-	-
QVQQOJJRRIAY	m	075-079	Emergency	negative	negative	concordant	-	-	-	-
WHKLMSLQYTSB	f	090-094	Infectious disease	negative	negative	concordant	-	-	-	-
LAELAHJWEMCS	f	080-084	Emergency	negative	negative	concordant	-	-	-	-
ODEWDPFYZRZW	m	060-064	Emergency	positive	positive	concordant	15	15	Asymptomatic	No
DOEGBXBITCMJ	m	060-064	Emergency	negative	negative	concordant	-	-	-	-
OLANIKZIUVGQ	f	035-039	Emergency	negative	negative	concordant	-	-	-	-
RWGWXJEOELLT	m	065-069	Infectious disease	negative	negative	concordant	-	-	-	-
FSSWUQKJAMJX	f	070-074	Emergency	negative	negative	concordant	-	-	-	-
UVJLAVJVHVXM	m	080-084	Emergency	negative	negative	concordant	-	-	-	-
CNOCBASMUZYV	f	035-039	Emergency	negative	negative	concordant	-	-	-	-
PKCIPJCXXKIY	m	035-039	Emergency	positive	positive	concordant	18.6	18.8	Symptomatic	No	0	fever
SUSRIJMDGEYS	f	085-089	Emergency	negative	negative	concordant	-	-	-	-
WHRRQHVJBBUY	f	045-049	Emergency	negative	negative	concordant	-	-	-	-
FTEWDDHGAANK	m	080-084	Emergency	negative	negative	concordant	-	-	-	-
BOXKJWOQLSQI	f	050-054	Emergency	negative	negative	concordant	-	-	-	-
RPYDQNKBNIQA	m	045-049	Infectious disease	negative	negative	concordant	-	-	-	-
XBXYRNABHEIB	f	085-089	Emergency	negative	negative	concordant	-	-	-	-
CRSIAYXFYXOX	f	080-084	Emergency	negative	negative	concordant	-	-	-	-
FBQDJQBFHNQY	f	080-084	Infectious disease	negative	negative	concordant	-	-	-	-
EMPRCDOZOGML	f	065-069	Emergency	negative	negative	concordant	-	-	-	-
QSMKAMUEBRJB	f	085-089	Emergency	negative	negative	concordant	-	-	-	-
RVHSGSTJGCOG	f	075-079	Emergency	negative	negative	concordant	-	-	-	-
CMYLVYQUINOI	m	095-099	Emergency	negative	negative	concordant	-	-	-	-
GHPWWDDYBECQ	m	070-074	Emergency	negative	negative	concordant	-	-	-	-
QMDJYDVQIZBU	f	080-084	Emergency	negative	negative	concordant	-	-	-	-
SXKEMJZHKNFO	m	085-089	Infectious disease	negative	negative	concordant	-	-	-	-
UOPGIVZWMOAA	m	030-034	Emergency	positive	negative	discordant	20.2	21	Symptomatic	Yes	2	fever, cough
FNKMTSHNERNE	m	025-029	Emergency	negative	negative	concordant	-	-	-	-
AZNFFNBPEITR	m	045-049	Emergency	negative	negative	concordant	-	-	-	-
ZDFMTHSUVSPE	f	050-054	Emergency	negative	negative	concordant	-	-	-	-
BASQYNFPECKY	m	020-024	Emergency	negative	negative	concordant	-	-	-	-
TJFZYZTALFMD	m	030-034	Emergency	negative	negative	concordant	-	-	-	-
YJFGUMICGHGA	m	080-084	Emergency	negative	negative	concordant	-	-	-	-
ARMFYBHZJTDU	f	090-094	Infectious disease	negative	negative	concordant	-	-	-	-
NBVZBQRWSQAV	m	060-064	Emergency	negative	negative	concordant	-	-	-	-
KLCSRSMQUXGL	f	060-064	Emergency	negative	negative	concordant	-	-	-	-
XGLQCAIGGSKZ	f	085-089	Emergency	negative	negative	concordant	-	-	-	-
EIHNWWDZDTKR	m	080-084	Infectious disease	negative	negative	concordant	-	-	-	-
EMKTBTGDMHGQ	m	040-044	Emergency	negative	negative	concordant	-	-	-	-
VDVDQJFZQTAS	m	025-029	Emergency	negative	negative	concordant	-	-	-	-
LYONGUBQLSTM	f	070-074	Emergency	negative	negative	concordant	-	-	-	-
SBVBIEDOQKYV	m	075-079	Emergency	negative	negative	concordant	-	-	-	-
NOZESOFFRCVN	m	075-079	Emergency	negative	negative	concordant	-	-	-	-
SRBSYZYRMXGV	f	075-079	Emergency	negative	negative	concordant	-	-	-	-
LVDKWGPEFVHC	m	075-079	Emergency	negative	negative	concordant	-	-	-	-
PKYDYZPSQORI	f	080-084	Infectious disease	negative	negative	concordant	-	-	-	-
OOGBDXIDRMOM	f	095-099	Infectious disease	negative	negative	concordant	-	-	-	-
AKHDTWIJUDBG	f	075-079	Emergency	negative	negative	concordant	-	-	-	-
ZPBFIUJNRDLX	f	030-034	Emergency	negative	negative	concordant	-	-	-	-
HPCXATWNLAGV	f	025-029	Emergency	negative	negative	concordant	-	-	-	-
OFOTEHHCWFHQ	m	045-049	Emergency	negative	negative	concordant	-	-	-	-
EIBSNTYAVGNO	f	075-079	Emergency	negative	negative	concordant	-	-	-	-
WGXVUYMHCCZU	m	035-039	Infectious disease	negative	negative	concordant	-	-	-	-
ZNESAGMOBFGU	f	090-094	Emergency	negative	negative	concordant	-	-	-	-
JSZSGWVIFSZQ	m	045-049	Emergency	positive	positive	concordant	20	20	Symptomatic	Yes	5	fever
UFAOEGMLJLJB	f	055-059	Emergency	negative	negative	concordant	-	-	-	-
RGUDXTGEWZNX	f	070-074	Emergency	negative	negative	concordant	-	-	-	-
HFSZUUARLCDZ	m	080-084	Emergency	negative	negative	concordant	-	-	-	-
MFCSREPNZHBH	m	080-084	Emergency	negative	negative	concordant	-	-	-	-
WHRRJTHSCKWN	f	050-054	Emergency	negative	negative	concordant	-	-	-	-
GRHWWDJAHDQL	m	075-079	Emergency	negative	negative	concordant	-	-	-	-
LXHCDOYWKJBX	f	020-024	Infectious disease	negative	negative	concordant	-	-	-	-
WFQERONIQXVK	f	040-044	Emergency	positive	positive	concordant	19	19	Symptomatic	No	0	myalgia
IWCINIHPTJHY	m	070-074	Emergency	negative	negative	concordant	-	-	-	-
YICOHIMTEXAN	m	045-049	Emergency	negative	negative	concordant	-	-	-	-
IXNPFDBFJDLY	m	085-089	Infectious disease	negative	negative	concordant	-	-	-	-
ZROLRBMKNAXN	m	070-074	Infectious disease	negative	negative	concordant	-	-	-	-
CLHSZMABUZIC	f	085-089	Emergency	negative	negative	concordant	-	-	-	-
LFSRPQMGFOEO	f	085-089	Infectious disease	negative	negative	concordant	-	-	-	-
PKBEXDHWFPGB	m	070-074	Emergency	negative	negative	concordant	-	-	-	-
PKNPUQCGQEDA	f	080-084	Emergency	negative	negative	concordant	-	-	-	-
UIZJKONWPIGJ	m	085-089	Emergency	negative	negative	concordant	-	-	-	-
NNBYRBXXQISR	m	070-074	Emergency	negative	negative	concordant	-	-	-	-
RKVLGFNISHRV	m	025-029	Emergency	negative	negative	concordant	-	-	-	-
ALQUUQIFRIHX	m	070-074	Emergency	negative	negative	concordant	-	-	-	-
JKUGOPYVGMVY	m	090-094	Emergency	negative	negative	concordant	-	-	-	-
VMEZARLLVZEM	m	045-049	Emergency	negative	negative	concordant	-	-	-	-
EOVUWCCONAZM	m	060-064	Emergency	negative	negative	concordant	-	-	-	-
ABSHSQGEGEKN	m	070-074	Infectious disease	negative	negative	concordant	-	-	-	-
HERZUJETAJSM	f	075-079	Emergency	positive	negative	discordant	25	26	Symptomatic	No	5	fever
YFFSFVGRIACN	f	050-054	Emergency	negative	negative	concordant	-	-	-	-
IPKQTAITTCYK	m	075-079	Emergency	negative	negative	concordant	-	-	-	-
VEBOMJHLMGPR	f	085-089	Emergency	negative	negative	concordant	-	-	-	-
FSUCKULFCGPN	m	020-024	Emergency	negative	negative	concordant	-	-	-	-
GYAQVCBNJJJL	m	035-039	Infectious disease	negative	negative	concordant	-	-	-	-
QMHWQVDXWDUK	m	070-074	Emergency	negative	negative	concordant	-	-	-	-
OITDNVGCZONU	m	060-064	Emergency	positive	negative	discordant	26	27	Symptomatic	Yes	9	fever, hyposmia
VXPXWKFIYKQA	m	090-094	Emergency	negative	negative	concordant	-	-	-	-
HKMWFBECXIGM	m	055-059	Emergency	negative	negative	concordant	-	-	-	-
GETKSNZFBHUU	f	065-069	Emergency	negative	negative	concordant	-	-	-	-
ZGRXHDHUUBNO	m	020-024	Emergency	negative	negative	concordant	-	-	-	-
DRGYEDKWZCHG	f	025-029	Emergency	positive	positive	concordant	16	16	Asymptomatic	No
IOLCWGNXKCUS	m	075-079	Emergency	negative	negative	concordant	-	-	-	-
GRZVOHXINNWA	f	085-089	Infectious disease	negative	negative	concordant	-	-	-	-
HMMKIJQJQNTW	m	035-039	Infectious disease	negative	negative	concordant	-	-	-	-
IBRVLRWMGKRN	m	030-034	Emergency	negative	negative	concordant	-	-	-	-
WUNCHONWHGQU	m	040-044	Emergency	negative	negative	concordant	-	-	-	-
HJEOBQPNDMEY	m	065-069	Emergency	negative	negative	concordant	-	-	-	-
FKOHADBIKCJT	m	080-084	Emergency	negative	negative	concordant	-	-	-	-
NDZXNWKXGSUX	m	025-029	Emergency	negative	negative	concordant	-	-	-	-
VNUDWEGIWWJV	m	020-024	Emergency	negative	negative	concordant	-	-	-	-
AIZNDIYYFTLT	f	035-039	Infectious disease	negative	negative	concordant	-	-	-	-
WJMAKHATZXWN	m	050-054	Emergency	negative	negative	concordant	-	-	-	-
TDGNGQRLZQHE	f	070-074	Emergency	negative	negative	concordant	-	-	-	-
WTEGXROWUYSI	f	050-054	Emergency	negative	negative	concordant	-	-	-	-
FMVWFKDKXQUE	f	035-039	Infectious disease	negative	negative	concordant	-	-	-	-
DVSKBDXEUPOD	m	020-024	Infectious disease	negative	negative	concordant	-	-	-	-
DVSKBDXEUPOD	m	020-024	Emergency	negative	negative	concordant	-	-	-	-
GGRTMTOZHMIF	m	085-089	Emergency	negative	negative	concordant	-	-	-	-
TINFYIBIKDZC	m	025-029	Emergency	negative	negative	concordant	-	-	-	-
HYKZSVLGTMZI	m	030-034	Emergency	positive	negative	discordant	33.7	NA	Symptomatic	No	13	fever
XBAORRSDONTB	m	035-039	Emergency	negative	negative	concordant	-	-	-	-
KFXOTTXUWWQT	f	095-099	Infectious disease	negative	negative	concordant	-	-	-	-
QCNEQAMQIOZR	f	020-024	Emergency	negative	negative	concordant	-	-	-	-
BTOPCJNPLSNA	m	070-074	Infectious disease	negative	negative	concordant	-	-	-	-
GUHCIMQESICP	f	075-079	Emergency	negative	negative	concordant	-	-	-	-
UXJIVFFMLMKX	m	085-089	Infectious disease	negative	negative	concordant	-	-	-	-
SVNHTYSUNNVF	f	085-089	Emergency	negative	negative	concordant	-	-	-	-
HINGQZIJZDPT	m	045-049	Emergency	negative	negative	concordant	-	-	-	-
CVDMKRXPWCFN	m	020-024	Emergency	negative	negative	concordant	-	-	-	-
ATKXFOPNOLBA	m	085-089	Emergency	negative	negative	concordant	-	-	-	-
JRXBFBTWFCKN	m	045-049	Emergency	positive	negative	discordant	25	24	Symptomatic	Yes	20	fever
FABHTEZDBKCC	m	025-029	Emergency	negative	negative	concordant	-	-	-	-
IMOQAIOUJCNV	m	085-089	Emergency	negative	negative	concordant	-	-	-	-
IWRFNZJHBFME	m	055-059	Emergency	negative	negative	concordant	-	-	-	-
UCJPGEXQMIGV	m	080-084	Emergency	negative	negative	concordant	-	-	-	-
TXUTHTMUXYRH	f	025-029	Emergency	positive	positive	concordant	29.2	29.2	Asymptomatic	No
AISQNABAFNLT	m	060-064	Infectious disease	negative	negative	concordant	-	-	-	-
HBGTQGPTQSZN	f	025-029	Emergency	negative	negative	concordant	-	-	-	-
VKMXHQVWHXGR	f	055-059	Emergency	negative	negative	concordant	-	-	-	-
EIWHKGUSDRBL	m	025-029	Emergency	negative	negative	concordant	-	-	-	-
NDAGVUQQHZJL	f	045-049	Emergency	negative	negative	concordant	-	-	-	-
NBUURMNWRANK	m	085-089	Emergency	negative	negative	concordant	-	-	-	-
NBUURMNWRANK	m	085-089	Infectious disease	negative	negative	concordant	-	-	-	-
HKAWUBJKEBLU	f	020-024	Emergency	negative	negative	concordant	-	-	-	-
UNZPTJTYYSRV	m	020-024	Emergency	positive	positive	concordant	16.1	16.3	Symptomatic	Yes	0	fever
OQLPRTAXLSCY	m	050-054	Emergency	positive	positive	concordant	18.7	19.2	Symptomatic	Yes	0	fever
MOWMWPBTAIDR	m	040-044	Emergency	negative	negative	concordant	-	-	-	-
WHZCNKKOOYHJ	f	070-074	Emergency	negative	negative	concordant	-	-	-	-
ZUIIUOUWLWFW	f	025-029	Emergency	negative	negative	concordant	-	-	-	-
KDLSSYUEOVFO	f	085-089	Emergency	negative	negative	concordant	-	-	-	-
MRIBKNGLDZVL	m	080-084	Infectious disease	negative	negative	concordant	-	-	-	-
ACPGZNPVMVFZ	m	090-094	Emergency	negative	negative	concordant	-	-	-	-
RFSVXRUPKCOI	f	085-089	Emergency	negative	negative	concordant	-	-	-	-
IHDBTLQUSYJP	m	075-079	Infectious disease	negative	negative	concordant	-	-	-	-
IHDBTLQUSYJP	m	075-079	Emergency	negative	negative	concordant	-	-	-	-
GQVOTUXLLSIG	m	080-084	Emergency	negative	negative	concordant	-	-	-	-
NVPVYBFJHNLZ	m	055-059	Emergency	negative	negative	concordant	-	-	-	-
JBDUQCNZWZKU	f	030-034	Emergency	negative	negative	concordant	-	-	-	-
KKMPJKJHFVUE	m	085-089	Emergency	negative	negative	concordant	-	-	-	-
IJKIHEBBORZF	m	025-029	Emergency	negative	negative	concordant	-	-	-	-
DFPTDTXFOMNL	f	065-069	Emergency	negative	negative	concordant	-	-	-	-
SYWENFZBPXOL	f	060-064	Emergency	negative	negative	concordant	-	-	-	-
BKUKQNZDHILQ	f	090-094	Emergency	negative	negative	concordant	-	-	-	-
YCHHZHASJYZA	m	035-039	Infectious disease	negative	negative	concordant	-	-	-	-
DPKXZSNKKUCG	m	065-069	Emergency	negative	negative	concordant	-	-	-	-
DCGTVKUKXUWK	f	085-089	Infectious disease	negative	negative	concordant	-	-	-	-
AFFLIOGUMJVD	m	080-084	Emergency	positive	negative	discordant	35	NA	Symptomatic	Yes	0	hematemesis
IDALWDZYJYDK	m	075-079	Emergency	positive	positive	concordant	20	21	Asymptomatic	No
IDTCEDQEFQJO	m	085-089	Emergency	negative	negative	concordant	-	-	-	-
OXRQULJUXHUW	f	090-094	Emergency	negative	negative	concordant	-	-	-	-
REQJWNJPPRQR	f	050-054	Emergency	negative	negative	concordant	-	-	-	-
WXJSBMSPEMLQ	m	070-074	Emergency	negative	negative	concordant	-	-	-	-
RECHPVUYWQKL	m	080-084	Infectious disease	negative	negative	concordant	-	-	-	-
BJTBQKIEXAEI	f	085-089	Emergency	negative	negative	concordant	-	-	-	-
SGCEULIUMSQC	m	075-079	Emergency	negative	negative	concordant	-	-	-	-
YKWAVSSWYRCA	m	050-054	Infectious disease	negative	negative	concordant	-	-	-	-
XSYHKJUBRJJG	f	080-084	Emergency	negative	negative	concordant	-	-	-	-
MGSLIYYTHQMD	f	090-094	Emergency	negative	negative	concordant	-	-	-	-
RTJEWMDFLZKW	m	030-034	Emergency	negative	negative	concordant	-	-	-	-
GTLAWHALDTKI	m	055-059	Emergency	negative	negative	concordant	-	-	-	-
JVYNGRJWSRPJ	m	070-074	Emergency	negative	negative	concordant	-	-	-	-
GMKYPMAFCQNR	f	085-089	Emergency	negative	negative	concordant	-	-	-	-
FOMEQFBKTMPV	m	090-094	Infectious disease	negative	negative	concordant	-	-	-	-
EUQHVXUDHPHU	m	075-079	Emergency	negative	negative	concordant	-	-	-	-
ORHCJSZTADEH	f	090-094	Emergency	negative	negative	concordant	-	-	-	-
BEMXUPOHZRHF	m	035-039	Emergency	negative	negative	concordant	-	-	-	-
ANULNBJWLANU	m	060-064	Emergency	negative	negative	concordant	-	-	-	-
WKHLWPRXTHHE	m	065-069	Emergency	negative	negative	concordant	-	-	-	-
RNSJZKKGVMVW	m	075-079	Emergency	negative	negative	concordant	-	-	-	-
TGOXAJLUYDDY	f	075-079	Emergency	negative	negative	concordant	-	-	-	-
KHZUIVUVJXZI	m	080-084	Emergency	negative	negative	concordant	-	-	-	-
FWGWNBSHUXIN	f	045-049	Emergency	positive	negative	discordant	31	31	Symptomatic	Yes	5	asthenia
OJWAQYRJCYSS	f	070-074	Infectious disease	negative	negative	concordant	-	-	-	-
UUFGRNQQNKGG	f	095-099	Emergency	negative	negative	concordant	-	-	-	-
JOXHQDQPZXDD	f	045-049	Emergency	negative	negative	concordant	-	-	-	-
GJRHXDDHCAZM	m	065-069	Emergency	negative	negative	concordant	-	-	-	-
MHCJHPGHJZBY	m	020-024	Emergency	negative	negative	concordant	-	-	-	-
DDFPNXAOXVBH	f	020-024	Emergency	negative	negative	concordant	-	-	-	-
PIGHCXWMYQOQ	m	075-079	Emergency	negative	negative	concordant	-	-	-	-
CNLRFUDURAMD	m	075-079	Emergency	negative	negative	concordant	-	-	-	-
EVYEYIIGJFFU	f	085-089	Emergency	negative	negative	concordant	-	-	-	-
RIAGANZATNOZ	m	080-084	Emergency	negative	negative	concordant	-	-	-	-
ERCANYLQQWHC	m	050-054	Emergency	negative	negative	concordant	-	-	-	-
BLCHIMIKOKXV	m	075-079	Emergency	negative	negative	concordant	-	-	-	-
DXHOJBTWJETH	f	085-089	Infectious disease	negative	negative	concordant	-	-	-	-
EYLEXMMHJNSJ	f	090-094	Emergency	negative	negative	concordant	-	-	-	-
ULBNFIMOVCNE	f	065-069	Emergency	negative	negative	concordant	-	-	-	-
EXFJEPZBCMAO	f	070-074	Emergency	negative	negative	concordant	-	-	-	-
JYANPFYSXOID	f	050-054	Emergency	negative	negative	concordant	-	-	-	-
QRUTLTQOZZEE	m	080-084	Emergency	negative	negative	concordant	-	-	-	-
KEWCZTIRVFPZ	f	030-034	Emergency	negative	negative	concordant	-	-	-	-
FGJZBZFCEVBX	f	030-034	Emergency	negative	negative	concordant	-	-	-	-
WZTYAFKCOHQS	f	060-064	Infectious disease	negative	negative	concordant	-	-	-	-
DDDTUIJQOLML	m	085-089	Emergency	negative	negative	concordant	-	-	-	-
KMWUCRKTGFJQ	m	050-054	Emergency	negative	negative	concordant	-	-	-	-
QYAZAXOMNRVA	m	080-084	Emergency	negative	negative	concordant	-	-	-	-
FJFXXWSZEZOI	f	030-034	Emergency	negative	negative	concordant	-	-	-	-
TGYPCBNTOSFP	f	085-089	Emergency	negative	negative	concordant	-	-	-	-
NYEXFQWKANMG	m	030-034	Emergency	negative	negative	concordant	-	-	-	-
QMVUKILIXMTF	f	090-094	Infectious disease	negative	negative	concordant	-	-	-	-
TZGCGAPKSWKN	m	045-049	Infectious disease	negative	negative	concordant	-	-	-	-
OQNTBZGYGUNA	f	085-089	Infectious disease	negative	negative	concordant	-	-	-	-
PQAKGLFYQSAV	m	055-059	Emergency	negative	negative	concordant	-	-	-	-
UXJUACNCJUUG	f	085-089	Emergency	negative	negative	concordant	-	-	-	-
JSDIACPVJMEX	f	085-089	Infectious disease	negative	negative	concordant	-	-	-	-
HPGECVEHLASE	m	055-059	Emergency	negative	negative	concordant	-	-	-	-
URFBAZBCHPHQ	m	030-034	Emergency	negative	negative	concordant	-	-	-	-
YGECBQHQIUVC	m	020-024	Emergency	negative	negative	concordant	-	-	-	-
AGRCVKZEYDSQ	f	065-069	Emergency	negative	negative	concordant	-	-	-	-
HPOUDTVJRUIK	m	085-089	Infectious disease	negative	negative	concordant	-	-	-	-
HAEULCRAZBEJ	f	075-079	Emergency	negative	negative	concordant	-	-	-	-
DXDJALEDSMUQ	f	060-064	Emergency	negative	negative	concordant	-	-	-	-
NEWWSIUKNNYE	m	075-079	Emergency	negative	negative	concordant	-	-	-	-
MEBBVZIMERNV	m	075-079	Emergency	negative	negative	concordant	-	-	-	-
KSFOBDRUCODX	m	085-089	Emergency	negative	negative	concordant	-	-	-	-
UZHGPBWJYQTD	f	075-079	Infectious disease	negative	negative	concordant	-	-	-	-
MJRCDMLKUVKE	m	070-074	Emergency	negative	negative	concordant	-	-	-	-
RVWFKLSOAWOE	m	045-049	Emergency	negative	negative	concordant	-	-	-	-
TCQVXXWLFHJC	m	040-044	Emergency	negative	negative	concordant	-	-	-	-
DCCPJDUEMYPP	f	075-079	Emergency	negative	negative	concordant	-	-	-	-
GHRQCDNKOGXX	m	065-069	Emergency	negative	negative	concordant	-	-	-	-
WZATKMEQGVHV	m	060-064	Infectious disease	negative	negative	concordant	-	-	-	-
YKPMXDMDJZMY	m	025-029	Emergency	negative	negative	concordant	-	-	-	-
RGSOFITKNVBP	f	020-024	Emergency	positive	positive	concordant	14	15.1	Symptomatic	No	9	fever, cough
XZIJDHASSEAY	f	065-069	Infectious disease	negative	negative	concordant	-	-	-	-
MKOBTIHFKBXY	f	030-034	Emergency	negative	negative	concordant	-	-	-	-
APVYXPVJWVVD	f	075-079	Emergency	negative	negative	concordant	-	-	-	-
MJTCATIKCRSO	f	065-069	Emergency	negative	negative	concordant	-	-	-	-
UTPUMKBMKKPT	f	060-064	Emergency	negative	negative	concordant	-	-	-	-
MLILGOTOUDIM	f	065-069	Emergency	negative	negative	concordant	-	-	-	-
MBJOGZNKMAUC	f	090-094	Emergency	negative	negative	concordant	-	-	-	-
KVYXWZOJHEXA	f	080-084	Emergency	negative	negative	concordant	-	-	-	-
NNIWWPGXPJUI	f	085-089	Emergency	negative	negative	concordant	-	-	-	-
BNZJVTULTTCV	m	070-074	Emergency	negative	negative	concordant	-	-	-	-
MXSXGJTCIAQX	m	050-054	Emergency	negative	negative	concordant	-	-	-	-
RSKHXZXUFPCA	m	040-044	Emergency	negative	negative	concordant	-	-	-	-
MFZSKMIBCJSX	m	050-054	Emergency	negative	negative	concordant	-	-	-	-
PARNORYDXIEM	m	050-054	Infectious disease	negative	negative	concordant	-	-	-	-
SSAEBTDLYEDR	f	065-069	Emergency	negative	negative	concordant	-	-	-	-
OICMQMKTCVGP	f	075-079	Infectious disease	negative	negative	concordant	-	-	-	-
NCVZKFAEPKIJ	m	050-054	Infectious disease	negative	negative	concordant	-	-	-	-
WRJFMFXMIUKE	f	060-064	Emergency	negative	negative	concordant	-	-	-	-
HHHQHKZKTPTF	m	090-094	Emergency	negative	negative	concordant	-	-	-	-
QFNTBLOCSVJQ	f	075-079	Emergency	negative	negative	concordant	-	-	-	-
IYRVBFXSVBIJ	m	085-089	Emergency	negative	negative	concordant	-	-	-	-
OCNVZKOEBLPR	f	030-034	Emergency	negative	negative	concordant	-	-	-	-
PKMSTRHMANEJ	m	075-079	Emergency	negative	negative	concordant	-	-	-	-
ZPGBPHTKEZZD	m	045-049	Emergency	negative	negative	concordant	-	-	-	-
QKEGXNVWVACV	m	080-084	Emergency	negative	negative	concordant	-	-	-	-
ZEQGWQZKOMPL	f	035-039	Emergency	negative	negative	concordant	-	-	-	-
JMVSQBKMTLXB	m	075-079	Infectious disease	negative	negative	concordant	-	-	-	-
YNDSPAHCBEVU	f	070-074	Emergency	negative	negative	concordant	-	-	-	-
QQRPYIBQALAF	f	085-089	Infectious disease	negative	negative	concordant	-	-	-	-
TTFZLTRRTYSH	m	080-084	Infectious disease	negative	negative	concordant	-	-	-	-
VOIZVRVKQLWY	m	080-084	Emergency	negative	negative	concordant	-	-	-	-
DAXHFSRCVMQA	m	065-069	Emergency	negative	negative	concordant	-	-	-	-
NTTBRZLPZZPK	m	020-024	Emergency	negative	negative	concordant	-	-	-	-
MMKVIDMHAWYX	m	090-094	Emergency	negative	negative	concordant	-	-	-	-
IXGZRBFNOOTV	m	040-044	Emergency	negative	negative	concordant	-	-	-	-
XVGQRCXEHQRI	m	025-029	Emergency	negative	negative	concordant	-	-	-	-
MKITFVHKGRWO	f	075-079	Emergency	negative	negative	concordant	-	-	-	-
KKAWFOMVEAKH	f	040-044	Emergency	negative	negative	concordant	-	-	-	-
KNLNGIWZSEHJ	f	070-074	Emergency	negative	negative	concordant	-	-	-	-
HRPZDXJTYQDD	m	040-044	Emergency	negative	negative	concordant	-	-	-	-
XILXDZVKTENJ	m	090-094	Emergency	negative	negative	concordant	-	-	-	-
KLHIYAVGIEFV	m	090-094	Emergency	negative	negative	concordant	-	-	-	-
BVBJXMMRLOOD	f	030-034	Emergency	negative	negative	concordant	-	-	-	-
HKILGWMRLZRL	m	025-029	Emergency	negative	negative	concordant	-	-	-	-
GNDWZBDNNFCL	m	075-079	Emergency	negative	negative	concordant	-	-	-	-
WTYBPPXMIKFW	f	060-064	Infectious disease	negative	negative	concordant	-	-	-	-
ERHDLLQEJKWQ	f	075-079	Emergency	negative	negative	concordant	-	-	-	-
TVPTNYQNBXIJ	f	080-084	Infectious disease	negative	negative	concordant	-	-	-	-
VQBUAXIJLKOX	m	045-049	Emergency	negative	negative	concordant	-	-	-	-
CIIIDGWCNCRS	m	055-059	Emergency	negative	negative	concordant	-	-	-	-
IZCXGOKOFPNW	f	090-094	Emergency	negative	negative	concordant	-	-	-	-
BJWOWWMRCJEC	f	065-069	Emergency	negative	negative	concordant	-	-	-	-
UXRQDROCFWER	m	080-084	Emergency	negative	negative	concordant	-	-	-	-
QPWFFLEBONQB	f	075-079	Emergency	negative	negative	concordant	-	-	-	-
KQJAKFDKKVJA	f	095-099	Emergency	negative	negative	concordant	-	-	-	-
QBZSPCCWYDEB	m	030-034	Emergency	negative	negative	concordant	-	-	-	-
GYSQFVWVNDYB	m	065-069	Emergency	negative	negative	concordant	-	-	-	-
VJUCSPQQMXGH	f	055-059	Emergency	negative	negative	concordant	-	-	-	-
TOPRJDYQUVQJ	f	080-084	Emergency	negative	negative	concordant	-	-	-	-
RPHKCGYXKMBA	f	060-064	Emergency	negative	negative	concordant	-	-	-	-
TZBGKKOQFFYP	m	075-079	Emergency	negative	negative	concordant	-	-	-	-
QHYJOGWNSADB	m	050-054	Emergency	negative	negative	concordant	-	-	-	-
PQAKNURIYPRP	m	090-094	Emergency	negative	negative	concordant	-	-	-	-
NTROPMOLHZCI	f	035-039	Emergency	negative	negative	concordant	-	-	-	-
ORWSOYTQCTPW	m	055-059	Emergency	negative	negative	concordant	-	-	-	-
IORUKIOUEUXH	m	095-099	Infectious disease	negative	negative	concordant	-	-	-	-
QBVELWUBCNKK	f	075-079	Emergency	positive	positive	concordant	21	21	Symptomatic	No	4	fever, cough
WDGVWTZOOUPO	m	070-074	Emergency	negative	negative	concordant	-	-	-	-
ZWFDGUBNDJFU	m	025-029	Emergency	negative	negative	concordant	-	-	-	-
LUETELSVPWHC	m	060-064	Emergency	negative	negative	concordant	-	-	-	-
DAVRUGYPXBEI	f	095-099	Infectious disease	negative	negative	concordant	-	-	-	-
NKWWYNVSMPPZ	f	065-069	Emergency	negative	negative	concordant	-	-	-	-
WFXEHABLHIML	f	090-094	Emergency	negative	negative	concordant	-	-	-	-
YFUKVIPYJKCS	f	080-084	Emergency	negative	negative	concordant	-	-	-	-
UIHDKGQZBHQH	f	080-084	Emergency	negative	negative	concordant	-	-	-	-
GGMDKYXIFKDQ	f	090-094	Infectious disease	negative	negative	concordant	-	-	-	-
XSXUBXGFEEFD	m	075-079	Emergency	negative	negative	concordant	-	-	-	-
VBPOIHXQEAXX	m	080-084	Emergency	negative	negative	concordant	-	-	-	-
WSIYYWHSTWKD	f	030-034	Emergency	negative	negative	concordant	-	-	-	-
KMENSCMABTAK	m	065-069	Infectious disease	positive	positive	concordant	21.7	21.9	Symptomatic	Yes	7	asthenia, fever
GOGZGGQJPYDK	m	085-089	Emergency	negative	negative	concordant	-	-	-	-
BQCEXAKOYZNG	f	080-084	Emergency	negative	negative	concordant	-	-	-	-
VYYRUTNACPQH	m	080-084	Emergency	negative	negative	concordant	-	-	-	-
HRCBUSXPGMZZ	f	040-044	Emergency	negative	negative	concordant	-	-	-	-
LHUWFALXKPTY	m	065-069	Emergency	negative	negative	concordant	-	-	-	-
QXDRRSRPCPQU	m	080-084	Emergency	negative	negative	concordant	-	-	-	-
QBZPWAVGRHPI	m	070-074	Emergency	negative	negative	concordant	-	-	-	-
OXONUIRJDKNF	m	040-044	Emergency	negative	negative	concordant	-	-	-	-
KEGEUMSYLTNA	m	070-074	Infectious disease	negative	negative	concordant	-	-	-	-
WEJHIGNKFZTJ	m	080-084	Emergency	negative	negative	concordant	-	-	-	-
WVUZLDZHQUDZ	f	025-029	Emergency	negative	negative	concordant	-	-	-	-
JPSRCBYNLCNM	m	095-099	Emergency	negative	negative	concordant	-	-	-	-
BYGFOEOXHDTK	m	060-064	Emergency	negative	negative	concordant	-	-	-	-
WAKOPYOTVCLA	m	080-084	Emergency	negative	negative	concordant	-	-	-	-
CIELNNNSHCXN	f	075-079	Infectious disease	negative	negative	concordant	-	-	-	-
NOFMTBQUTZXN	f	085-089	Emergency	negative	negative	concordant	-	-	-	-
QZTJEJFZBXWG	m	085-089	Infectious disease	negative	negative	concordant	-	-	-	-
TMANWTYADQNI	f	080-084	Emergency	negative	negative	concordant	-	-	-	-
PIYNREFQOQMN	m	080-084	Infectious disease	negative	negative	concordant	-	-	-	-
TTMAJYMAYXYT	m	040-044	Emergency	negative	negative	concordant	-	-	-	-
ZGSNYIKCGQLH	m	080-084	Infectious disease	negative	negative	concordant	-	-	-	-
LBIVPHSNAPAE	f	075-079	Emergency	negative	negative	concordant	-	-	-	-
KNGEZXEKWUHF	f	050-054	Emergency	negative	negative	concordant	-	-	-	-
KUCCKRKXFTWP	f	060-064	Emergency	negative	negative	concordant	-	-	-	-
QGYSUYLVDOER	f	035-039	Emergency	negative	negative	concordant	-	-	-	-
UJARMADUYZED	m	080-084	Infectious disease	negative	negative	concordant	-	-	-	-
TORCISKPABVT	m	055-059	Infectious disease	negative	negative	concordant	-	-	-	-
PJTITBBWDLAB	m	050-054	Emergency	negative	negative	concordant	-	-	-	-
GFMZPZYBJSAT	f	020-024	Infectious disease	negative	negative	concordant	-	-	-	-
KIYUCCXKQEOY	f	045-049	Emergency	negative	negative	concordant	-	-	-	-
VPINZVRSKHVO	f	070-074	Emergency	negative	negative	concordant	-	-	-	-
PPORUNSCPFKM	f	065-069	Emergency	negative	negative	concordant	-	-	-	-
KJGYYPOJPFSG	f	090-094	Emergency	negative	negative	concordant	-	-	-	-
FOYVYRTHFEGA	m	070-074	Emergency	negative	negative	concordant	-	-	-	-
UFUMPXQNHBGJ	m	085-089	Infectious disease	negative	negative	concordant	-	-	-	-
FDDSSALNPHGN	f	090-094	Emergency	negative	negative	concordant	-	-	-	-
QGXJZZXAXIRB	m	070-074	Emergency	negative	negative	concordant	-	-	-	-
OZNNTIMPZXMD	m	075-079	Emergency	negative	negative	concordant	-	-	-	-
BQWOCKICVZUS	m	080-084	Emergency	negative	negative	concordant	-	-	-	-
HONGBYOLDFES	m	050-054	Emergency	negative	negative	concordant	-	-	-	-
DZSUNZPBJSQZ	m	060-064	Emergency	negative	negative	concordant	-	-	-	-
NTJPMGFQAITY	f	080-084	Emergency	negative	negative	concordant	-	-	-	-
JJPYITDQBFEZ	m	065-069	Emergency	negative	negative	concordant	-	-	-	-
MTZOJOOXVUAN	m	050-054	Infectious disease	negative	negative	concordant	-	-	-	-
KFBEDIMELOQR	m	050-054	Emergency	negative	negative	concordant	-	-	-	-
FHOKTNKUYEOJ	m	095-099	Emergency	negative	negative	concordant	-	-	-	-
QPWZEAIDDQIJ	f	070-074	Emergency	negative	negative	concordant	-	-	-	-
PNUNPXIFFGTT	f	085-089	Infectious disease	negative	negative	concordant	-	-	-	-
FFEAWLWGOUJU	m	045-049	Emergency	negative	negative	concordant	-	-	-	-
WXWJACVDBGMK	m	050-054	Infectious disease	negative	negative	concordant	-	-	-	-
CETKDWNTTXLO	m	080-084	Emergency	negative	negative	concordant	-	-	-	-
SOFPHJCSNXIM	f	020-024	Emergency	negative	negative	concordant	-	-	-	-
BLVIPGFCZCGI	m	075-079	Emergency	negative	negative	concordant	-	-	-	-
JXZDRGXAULGR	f	050-054	Emergency	negative	negative	concordant	-	-	-	-
SRDXZUIOJHYM	f	080-084	Emergency	negative	negative	concordant	-	-	-	-
HCCNMHSXVPIP	f	070-074	Infectious disease	negative	negative	concordant	-	-	-	-
EPZKEIYOIZRR	f	045-049	Emergency	negative	negative	concordant	-	-	-	-
GLHIUNRAWVQR	m	065-069	Emergency	negative	negative	concordant	-	-	-	-
URRPINIFPZBB	f	035-039	Emergency	negative	negative	concordant	-	-	-	-
QZQPRULISDMR	m	075-079	Emergency	negative	negative	concordant	-	-	-	-
LAHBDVQDHWDD	f	060-064	Infectious disease	negative	negative	concordant	-	-	-	-
JTQFVMHDELKV	f	025-029	Emergency	positive	positive	concordant	14	14	Symptomatic	No	10	headache,fever
NGORZNKLSPDR	m	085-089	Infectious disease	negative	negative	concordant	-	-	-	-
DONGXQFAXQAR	f	085-089	Emergency	negative	negative	concordant	-	-	-	-
JLVTNIVYGTCC	f	045-049	Emergency	negative	negative	concordant	-	-	-	-
FHQWYQLDKODL	f	095-099	Infectious disease	negative	negative	concordant	-	-	-	-
ASIIVENEBSEI	m	075-079	Infectious disease	negative	negative	concordant	-	-	-	-
XPHNYHUUGPGC	m	075-079	Emergency	negative	negative	concordant	-	-	-	-
KXLCKBUWWLUB	m	060-064	Infectious disease	negative	negative	concordant	-	-	-	-
PNHDLFAALRBI	f	080-084	Emergency	negative	negative	concordant	-	-	-	-
AQCBKSGVRWNI	f	085-089	Infectious disease	negative	negative	concordant	-	-	-	-
LEFEZKQAXSJQ	f	075-079	Emergency	negative	negative	concordant	-	-	-	-
AMJHXAFHBOFQ	f	080-084	Infectious disease	negative	negative	concordant	-	-	-	-
MFQHUDJPYGHP	f	070-074	Emergency	negative	negative	concordant	-	-	-	-
UUPBTOAFOQTO	f	035-039	Emergency	negative	negative	concordant	-	-	-	-
FLPLRCTXJYTT	f	030-034	Emergency	negative	negative	concordant	-	-	-	-
ZRBZMSZZAEMQ	f	080-084	Emergency	negative	negative	concordant	-	-	-	-
HPKOAQOWDDLQ	m	080-084	Emergency	positive	positive	concordant	21	22	Symptomatic	No	7	fever, asthenia
IYFSUAHYVQRT	f	070-074	Infectious disease	negative	negative	concordant	-	-	-	-
SKBNZIPMJNJI	m	080-084	Emergency	negative	negative	concordant	-	-	-	-
HIMIXWTEJPLT	m	090-094	Emergency	negative	negative	concordant	-	-	-	-
NECNZRYGCBQJ	m	060-064	Infectious disease	negative	negative	concordant	-	-	-	-
ZRGIESUMMMPA	m	045-049	Emergency	negative	negative	concordant	-	-	-	-
OFIPGDHKRCWU	m	050-054	Emergency	negative	negative	concordant	-	-	-	-
ZOETEYMRFDFB	f	045-049	Infectious disease	negative	negative	concordant	-	-	-	-
COAWKDRHBNNC	f	090-094	Emergency	negative	negative	concordant	-	-	-	-
GMWCDOTSOAKQ	m	070-074	Emergency	negative	negative	concordant	-	-	-	-
IYDGHDOKFWVU	f	065-069	Emergency	negative	negative	concordant	-	-	-	-
LFBGPYRQPNIJ	f	075-079	Emergency	negative	negative	concordant	-	-	-	-
FKRVKXDUAZSJ	f	065-069	Emergency	negative	negative	concordant	-	-	-	-
TLMVBYYEZITJ	m	025-029	Emergency	negative	negative	concordant	-	-	-	-
ZPRHFTNAXSRU	m	020-024	Emergency	negative	negative	concordant	-	-	-	-
WWRDNFPGWHTN	f	055-059	Emergency	negative	negative	concordant	-	-	-	-
ZXUGKQQUIZVJ	f	070-074	Emergency	negative	negative	concordant	-	-	-	-
XEYHJUDCNBNU	f	095-099	Emergency	negative	negative	concordant	-	-	-	-
MMBSEUAIAANS	m	075-079	Infectious disease	negative	negative	concordant	-	-	-	-
LCGLOGLBKXTY	f	055-059	Emergency	negative	negative	concordant	-	-	-	-
JHNSCYJBFZLM	f	050-054	Emergency	negative	negative	concordant	-	-	-	-
BDQPOYYBYTJA	m	030-034	Infectious disease	negative	negative	concordant	-	-	-	-
TOKZJBHSIERI	f	070-074	Emergency	negative	negative	concordant	-	-	-	-
HCOFLTOGNJWO	m	065-069	Emergency	negative	negative	concordant	-	-	-	-
DFHLCHVQBRJY	m	080-084	Emergency	negative	negative	concordant	-	-	-	-
YLTGTWJUUYRN	m	075-079	Emergency	negative	negative	concordant	-	-	-	-
OOCCWDOSVSFA	m	075-079	Emergency	negative	negative	concordant	-	-	-	-
HYCKERREUHXW	f	030-034	Emergency	negative	negative	concordant	-	-	-	-
XCQCYCYNLTET	f	040-044	Emergency	negative	negative	concordant	-	-	-	-
ADVNAFIQTSOS	f	070-074	Emergency	negative	negative	concordant	-	-	-	-
GRWYNIRLTIKI	m	045-049	Emergency	negative	negative	concordant	-	-	-	-
CWROGKKJRHVN	f	095-099	Emergency	negative	negative	concordant	-	-	-	-
IOYQVQBVTNPG	f	035-039	Emergency	negative	negative	concordant	-	-	-	-
MGAJHHRBAHUJ	f	070-074	Emergency	negative	negative	concordant	-	-	-	-
WOWFABCUNLIX	f	085-089	Emergency	negative	negative	concordant	-	-	-	-
EEOYMKSKTYQG	f	070-074	Emergency	negative	negative	concordant	-	-	-	-
KRLKDGKJCAJN	m	025-029	Infectious disease	negative	negative	concordant	-	-	-	-
MTBFCRENMGLA	m	070-074	Infectious disease	negative	negative	concordant	-	-	-	-
XZXGKDPZZDUS	f	080-084	Infectious disease	negative	negative	concordant	-	-	-	-
XQZCFWQHYQXB	m	080-084	Emergency	negative	negative	concordant	-	-	-	-
DYLIZJAFKARS	f	080-084	Infectious disease	negative	negative	concordant	-	-	-	-
DYIVHPZNUPCN	f	085-089	Emergency	negative	negative	concordant	-	-	-	-
UWVYSPQPOKNM	m	045-049	Emergency	negative	negative	concordant	-	-	-	-
VUXTSIZOXTZX	f	020-024	Emergency	negative	negative	concordant	-	-	-	-
CRPEVLWQYVNF	m	055-059	Emergency	negative	negative	concordant	-	-	-	-
NLSKCVAHYUUB	m	060-064	Emergency	negative	negative	concordant	-	-	-	-
BBWIMAJKJOFE	f	025-029	Emergency	negative	negative	concordant	-	-	-	-
AVAICZYCYAWT	m	065-069	Emergency	negative	negative	concordant	-	-	-	-
YEOOQEPMJPTD	m	070-074	Emergency	negative	negative	concordant	-	-	-	-
GQTSQQSWWEOM	f	030-034	Emergency	negative	negative	concordant	-	-	-	-
HWEBWZXKNBIO	m	065-069	Emergency	negative	negative	concordant	-	-	-	-
OARSYYTDBBPW	m	080-084	Emergency	negative	negative	concordant	-	-	-	-
YQKQNKKZLBXC	f	020-024	Emergency	negative	negative	concordant	-	-	-	-
RERWHUCWVMAB	m	065-069	Infectious disease	negative	negative	concordant	-	-	-	-
QXNTIZBJSYGN	m	060-064	Emergency	negative	negative	concordant	-	-	-	-
JPGRTAPXUYYM	f	030-034	Emergency	negative	negative	concordant	-	-	-	-
VERVLJZQUKPB	m	075-079	Emergency	negative	negative	concordant	-	-	-	-
ESTKIIPUPPXN	f	080-084	Emergency	negative	negative	concordant	-	-	-	-
WBHCMITOKSQE	f	085-089	Emergency	negative	negative	concordant	-	-	-	-
PNMKMGICHUEW	f	080-084	Emergency	negative	negative	concordant	-	-	-	-
RLTGKQLICPTH	m	060-064	Emergency	negative	negative	concordant	-	-	-	-
ZBVDRNIECECH	m	090-094	Infectious disease	negative	negative	concordant	-	-	-	-
ULAXTHHGUHVQ	m	050-054	Emergency	negative	negative	concordant	-	-	-	-
CHGICATYDJED	m	080-084	Emergency	negative	negative	concordant	-	-	-	-
AGFTLJTCFLLP	f	075-079	Emergency	negative	negative	concordant	-	-	-	-
IIVJQQXGUDZD	m	050-054	Emergency	negative	negative	concordant	-	-	-	-
VZHYYQEQNFET	f	080-084	Emergency	negative	negative	concordant	-	-	-	-
JEKASNSJJORY	m	085-089	Emergency	negative	negative	concordant	-	-	-	-
ISFPNZGPGSXE	m	060-064	Emergency	negative	negative	concordant	-	-	-	-
RFQQVIDAZOFQ	f	030-034	Emergency	negative	negative	concordant	-	-	-	-
TXDEFDIKRDJG	m	055-059	Emergency	negative	negative	concordant	-	-	-	-
LIHLLZLNWNGX	m	060-064	Emergency	negative	negative	concordant	-	-	-	-
TAWFLGVUTZOK	m	075-079	Emergency	negative	negative	concordant	-	-	-	-
CAAVACBRMUVY	f	065-069	Emergency	negative	negative	concordant	-	-	-	-
NYFUINDZLEWW	m	050-054	Infectious disease	negative	negative	concordant	-	-	-	-
YUNURDERPBOJ	f	075-079	Emergency	negative	negative	concordant	-	-	-	-
EDTCFFYNCKTJ	f	075-079	Emergency	negative	negative	concordant	-	-	-	-
WXJJWMDKBGFF	f	080-084	Emergency	negative	negative	concordant	-	-	-	-
YZBRRJWZXAZQ	f	070-074	Emergency	negative	negative	concordant	-	-	-	-
CPJSDMAQJQOX	m	065-069	Emergency	negative	negative	concordant	-	-	-	-
NJMGBPXQBVIE	f	050-054	Emergency	negative	negative	concordant	-	-	-	-
HCUHJPNWVWOI	m	065-069	Infectious disease	negative	negative	concordant	-	-	-	-
FWVUBGSSNMOD	m	065-069	Emergency	negative	negative	concordant	-	-	-	-
YVDNGVUNOXTC	m	070-074	Emergency	negative	negative	concordant	-	-	-	-
YAHHPAQKILNH	m	060-064	Emergency	negative	negative	concordant	-	-	-	-
JRSAKQXVAAKE	f	035-039	Emergency	negative	negative	concordant	-	-	-	-
UMZCNDROAOZL	f	090-094	Emergency	negative	negative	concordant	-	-	-	-
FDOMJIGVXYNQ	m	020-024	Infectious disease	positive	positive	concordant	14.8	15.3	Symptomatic	Yes	0	fever
ELDRWIPZNBHU	f	075-079	Emergency	negative	negative	concordant	-	-	-	-
ODITWFEVYZCE	m	075-079	Emergency	negative	negative	concordant	-	-	-	-
UCLAGGQCTFBC	f	030-034	Emergency	negative	negative	concordant	-	-	-	-
AHTPSBHQMLTZ	f	065-069	Emergency	negative	negative	concordant	-	-	-	-
SPYZVCHYGJRQ	m	020-024	Infectious disease	negative	negative	concordant	-	-	-	-
ZSRUVSFJVIUJ	f	090-094	Infectious disease	negative	negative	concordant	-	-	-	-
BHSALRBTNNVJ	f	075-079	Emergency	negative	negative	concordant	-	-	-	-
FDMJPBYSQXYD	m	025-029	Emergency	negative	negative	concordant	-	-	-	-
XWHCXMJTQFLP	f	080-084	Emergency	negative	negative	concordant	-	-	-	-
VUCPTZFEKDUM	m	040-044	Infectious disease	negative	negative	concordant	-	-	-	-
LIQJDDSRHNUB	m	040-044	Emergency	negative	negative	concordant	-	-	-	-
EKKZJXGRGNHV	f	085-089	Infectious disease	negative	negative	concordant	-	-	-	-
MIVUQVJPXDQD	m	095-099	Infectious disease	negative	negative	concordant	-	-	-	-
UPVHRYDQODDJ	m	065-069	Emergency	negative	negative	concordant	-	-	-	-
LPTALXGRIHGG	m	065-069	Emergency	negative	negative	concordant	-	-	-	-
RDAPDMUOVJWT	m	035-039	Emergency	negative	negative	concordant	-	-	-	-
SODYSGMQEHYW	m	085-089	Infectious disease	negative	negative	concordant	-	-	-	-
GVEBESJJKNFM	m	070-074	Emergency	negative	negative	concordant	-	-	-	-
SUJJJOCLELHM	m	060-064	Infectious disease	negative	negative	concordant	-	-	-	-
UTSTTABBHBWN	m	025-029	Emergency	negative	negative	concordant	-	-	-	-
QVFVQVQOHCDO	m	070-074	Emergency	negative	negative	concordant	-	-	-	-
QFBVHDSDBROE	m	080-084	Emergency	negative	negative	concordant	-	-	-	-
GWZZJSCIWQUD	m	085-089	Emergency	negative	negative	concordant	-	-	-	-
FKCPKKMHRSSN	f	080-084	Emergency	negative	negative	concordant	-	-	-	-
DDXUMSXDWGPO	f	085-089	Emergency	negative	negative	concordant	-	-	-	-
CHDLKOFYENEO	f	070-074	Emergency	negative	negative	concordant	-	-	-	-
VOZZPTZCPZBL	f	080-084	Infectious disease	negative	negative	concordant	-	-	-	-
IYSQMWZMNOZY	m	060-064	Emergency	negative	negative	concordant	-	-	-	-
ERJDTNNWJQAB	m	090-094	Infectious disease	negative	negative	concordant	-	-	-	-
RQEDXQMSMDGM	f	040-044	Emergency	positive	positive	concordant	19.5	19.8	Symptomatic	Yes	6	asthenia, fever
JUQTFKAOQPRE	m	075-079	Emergency	negative	negative	concordant	-	-	-	-
OBAOUHHIGSCR	m	070-074	Emergency	negative	negative	concordant	-	-	-	-
RGOWCOZRKJNU	m	080-084	Emergency	negative	negative	concordant	-	-	-	-
QLUCYHBHKDFT	f	060-064	Emergency	negative	negative	concordant	-	-	-	-
WGKNPYYLRAVF	f	045-049	Emergency	negative	negative	concordant	-	-	-	-
YVVWQHHNZVQX	m	070-074	Infectious disease	negative	negative	concordant	-	-	-	-
FROCKARRSPBG	m	040-044	Emergency	negative	negative	concordant	-	-	-	-
SFXRTCQFXWHP	m	055-059	Infectious disease	negative	negative	concordant	-	-	-	-
DZQPPYDQJHUM	m	025-029	Emergency	negative	negative	concordant	-	-	-	-
NCFFDQHOYNNE	f	095-099	Infectious disease	negative	negative	concordant	-	-	-	-
NDQFEEZPGDLH	f	055-059	Emergency	positive	positive	concordant	19.3	19.5	Symptomatic	Yes	0	asthenia
GRMWRNPIATZF	m	040-044	Emergency	negative	negative	concordant	-	-	-	-
IEVHNPFWAEOH	m	050-054	Emergency	negative	negative	concordant	-	-	-	-
XSXWRLEYTLYE	m	090-094	Emergency	negative	negative	concordant	-	-	-	-
IDRMCAKCUAJF	f	060-064	Emergency	negative	negative	concordant	-	-	-	-
IRKWBORKQJJE	f	065-069	Infectious disease	negative	negative	concordant	-	-	-	-
YZVQPPZOOKKD	m	070-074	Emergency	negative	negative	concordant	-	-	-	-
MGQMNLOTVNCC	m	060-064	Emergency	negative	negative	concordant	-	-	-	-
BRPTIPPJAHQB	m	075-079	Emergency	negative	negative	concordant	-	-	-	-
MFWZRESOYAJJ	m	080-084	Emergency	negative	negative	concordant	-	-	-	-
LOMEAJAUNIOR	m	025-029	Emergency	positive	positive	concordant	17	17	Symptomatic	No	1	fever
AARFRVKWIJQR	m	070-074	Emergency	negative	negative	concordant	-	-	-	-
LNZMVECPEVFT	f	060-064	Infectious disease	negative	negative	concordant	-	-	-	-
NMGMQFFOYNZT	m	080-084	Infectious disease	negative	negative	concordant	-	-	-	-
LXHNAZVGUROM	m	050-054	Emergency	negative	negative	concordant	-	-	-	-
ZDRSWTOHXULB	m	080-084	Emergency	negative	negative	concordant	-	-	-	-
SKNCCEYWJZZQ	m	050-054	Emergency	negative	negative	concordant	-	-	-	-
ZVMFTRMTDLJG	f	055-059	Emergency	negative	negative	concordant	-	-	-	-
IDMFQTMBINOB	f	085-089	Infectious disease	negative	negative	concordant	-	-	-	-
VFTLFGYDLZFM	f	055-059	Emergency	negative	negative	concordant	-	-	-	-
CKXEVKSXHFZZ	m	075-079	Emergency	negative	negative	concordant	-	-	-	-
LOKCSCDTGEQS	f	025-029	Emergency	negative	negative	concordant	-	-	-	-
BIJFGOMPTMOI	f	040-044	Emergency	negative	negative	concordant	-	-	-	-
QDNUCIGTJIAE	m	060-064	Infectious disease	negative	negative	concordant	-	-	-	-
AHAUTXKKVQUJ	f	055-059	Emergency	negative	negative	concordant	-	-	-	-
MKJVAJRHPZPD	m	080-084	Emergency	negative	negative	concordant	-	-	-	-
ZZMCPXABSHJP	f	085-089	Emergency	negative	negative	concordant	-	-	-	-
XYZQSSSMYZSX	m	020-024	Emergency	negative	negative	concordant	-	-	-	-
ESXUKTGXWEIQ	f	050-054	Emergency	negative	negative	concordant	-	-	-	-
WYSLQHFRQTVZ	f	080-084	Emergency	negative	negative	concordant	-	-	-	-
FXNVSFKKXMQO	m	070-074	Emergency	negative	negative	concordant	-	-	-	-
NEGEQTBVILVX	f	080-084	Emergency	negative	negative	concordant	-	-	-	-
NXOSUFGDZUNO	m	065-069	Emergency	negative	negative	concordant	-	-	-	-
JXLCEYMLURQV	m	060-064	Emergency	negative	negative	concordant	-	-	-	-
HOWZUUQBZUHH	m	060-064	Infectious disease	negative	negative	concordant	-	-	-	-
CUMCNSURGFEZ	m	095-099	Emergency	negative	negative	concordant	-	-	-	-
UZNDBMYBUXHX	m	070-074	Emergency	negative	negative	concordant	-	-	-	-
VUGQWGAPZXYH	f	080-084	Infectious disease	negative	negative	concordant	-	-	-	-
PFOVSSJWVMBF	m	075-079	Infectious disease	negative	negative	concordant	-	-	-	-
ZNHZYITGZVZJ	f	030-034	Emergency	negative	negative	concordant	-	-	-	-
FVGGJGYZGBWL	m	070-074	Emergency	negative	negative	concordant	-	-	-	-
DZZXBHYFDHIH	f	085-089	Emergency	negative	negative	concordant	-	-	-	-
TRJZSQRRZAZQ	f	020-024	Emergency	negative	negative	concordant	-	-	-	-
FDSYWJUMWHZI	m	065-069	Emergency	negative	negative	concordant	-	-	-	-
LUZTYFEPRWWF	f	085-089	Infectious disease	negative	negative	concordant	-	-	-	-
ASCNTPEEHHVW	m	085-089	Emergency	negative	negative	concordant	-	-	-	-
GQPFOOPDUNKB	m	060-064	Emergency	positive	positive	concordant	17.2	17.5	Symptomatic	Yes	0	severe dyspnea
LOMAQNVJHOYJ	f	085-089	Emergency	negative	negative	concordant	-	-	-	-
VKFDQHMZPSGS	f	090-094	Emergency	negative	negative	concordant	-	-	-	-
UOUBCKYVSEOT	f	035-039	Emergency	negative	negative	concordant	-	-	-	-
YBEEHTQZJPAY	m	035-039	Emergency	negative	negative	concordant	-	-	-	-
ETOXZCMMBEMP	m	050-054	Emergency	negative	negative	concordant	-	-	-	-
CBOUUXRSKGZM	f	075-079	Emergency	negative	negative	concordant	-	-	-	-
ATIZHHZJNAVB	m	065-069	Emergency	positive	negative	discordant	32	31	Symptomatic	Yes	8	fever
JCYEDSXCEXPE	f	085-089	Emergency	negative	negative	concordant	-	-	-	-
JYANLMAUSFDJ	m	050-054	Infectious disease	negative	negative	concordant	-	-	-	-
EKKVJKRSOJDC	f	060-064	Emergency	negative	negative	concordant	-	-	-	-
NEWFFLTYFHQM	m	050-054	Emergency	negative	negative	concordant	-	-	-	-
QBYLTQLBDDUV	m	060-064	Emergency	negative	negative	concordant	-	-	-	-
RLMBVNHTQXGX	m	045-049	Emergency	negative	negative	concordant	-	-	-	-
FMRNSDDAPRKW	f	025-029	Emergency	negative	negative	concordant	-	-	-	-
ZRZRKSRARLNK	f	075-079	Emergency	negative	negative	concordant	-	-	-	-
QFIOPGHENSBU	f	090-094	Emergency	negative	negative	concordant	-	-	-	-
SPXCLUUWQINB	m	060-064	Emergency	positive	negative	discordant	21	NA	Asymptomatic	No

## Sheet: legend1
Code	anonymized code of the patient
Sex	Either male (m) or female (f)
Age range	5-year range reported
Hospital ward	Either Emergengy (A&E) or Infectious Disease
DNCOV	Swab nasopharingeal RT-PCR testing
ANCOV	Rapid Antigen Test
Concordance	Either concordant or discondant antigen and moleculat tests
Ct S gene	RT-PCR cycle threshold of S gene
Ct ORF1 gene	RT-PCR cycle threshold of ORF1 gene
Symptoms	Either symptomatic or asymptomatic
Pneumonia	Either 'yes' or 'no' diagnosed pneumonia
Symptom onset: distance in days from the date of admission	Onset of first symptoms declared by the patient
Symptom type	Type of symptoms declared by the patient

## Sheet: ANCOV or DNCOV
Code	Sex	Age range	Hospital ward	DNCOV	ANCOV	Pneumonia
SABVEEUJUYCY	f	030-034	Emergency	-	negative
NOEAKYFYYTFF	f	035-039	Emergency	-	negative
RORWSWYVQCKS	m	050-054	Emergency	-	positive	yes
ABGQNWCLIUSB	f	070-074	Emergency	-	negative
OWGQGPBKYTTX	f	040-044	Emergency	negative	-
XMTHKSEDKDIK	f	030-034	Emergency	-	negative
ALMULGEKKOMI	f	040-044	Infectious disease	negative	-
VZSMUVOSYAAY	f	030-034	Emergency	negative	-
HFERCUNCUJES	m	070-074	Infectious disease	-	negative
OUXUMQYGXTDV	f	080-084	Emergency	-	negative
FOYTMIHMICFN	m	030-034	Emergency	negative	-
BQXLREXQKIZQ	f	065-069	Emergency	-	negative
WNLEFZFGYLGL	m	085-089	Emergency	negative	-
OXHKGJTNDXCT	f	025-029	Emergency	negative	-
OBGGINXZNEJE	f	025-029	Emergency	negative	-
DKBBTEYFJJRS	f	020-024	Emergency	positive	-	no
FFOIGUDTYERA	m	040-044	Emergency	-	negative
AXICOZJZBDVY	f	025-029	Emergency	-	negative
WGYUNTQPJGDZ	f	090-094	Emergency	negative	-
YIAVEARXBOAL	f	070-074	Emergency	-	negative
TFPJYOULPQTX	f	030-034	Emergency	negative	-
ZRQQOZKEEUEP	m	055-059	Emergency	negative	-
VRXNRVRYTCBN	f	080-084	Emergency	-	negative
EIXCCOVGYICZ	m	025-029	Emergency	-	negative
BGTAVNEYCTEI	m	070-074	Emergency	-	positive	no
VQMDPOGLCEUU	m	050-054	Emergency	negative	-
AZUCMGNDIYNR	m	040-044	Infectious disease	-	negative
WYMKIJRCNZOV	m	035-039	Emergency	negative	-
HPZXJFCKWTAS	m	050-054	Infectious disease	-	negative
MSWAFQYVGVTB	f	025-029	Emergency	negative	-
ZGEFANBZUSIR	m	070-074	Emergency	-	negative
QLDVACJNMNKW	f	080-084	Emergency	negative	-
OKJDDNSPIJFD	m	035-039	Infectious disease	negative	-
IWICXDQBOBTM	m	080-084	Emergency	negative	-
TJXCDSGYOGPD	f	080-084	Emergency	-	negative
OCVXNVWTIEKR	f	060-064	Infectious disease	-	negative
DRPJKCUHOCTP	f	025-029	Emergency	-	negative
GQMBVFQBUHQQ	f	030-034	Infectious disease	negative	-
KKDLVECWFTWE	m	025-029	Emergency	negative	-
GRPWKJQVOOXB	m	035-039	Emergency	-	negative
KUFTIKWNVCGS	f	090-094	Emergency	-	negative
FKTRKKOUDDAV	f	065-069	Emergency	negative	-
RABPWRKPZEAG	m	025-029	Emergency	-	negative
NSIJEZTVUWDK	m	045-049	Emergency	negative	-
HMDEQVPUWKKO	f	035-039	Emergency	-	negative
ZYLPUVVZVTIO	f	050-054	Emergency	negative	-
RODRXUDKZUVP	f	025-029	Emergency	negative	-
ZHGQVFLBNPRX	f	060-064	Emergency	-	negative
KUVEIMCGWAFZ	m	035-039	Emergency	negative	-
VBUXFRSXIPWO	m	060-064	Infectious disease	-	negative
ORWINAZJHLUC	m	025-029	Infectious disease	negative	-
HJQTIEZYXMPZ	m	065-069	Emergency	-	negative
HMEQWQWHSVTH	f	065-069	Emergency	-	negative
WEIDRJYUXUIQ	f	080-084	Infectious disease	-	negative
KTSTLOZXVAVV	f	080-084	Emergency	-	negative
KWSAKATWVJHZ	m	050-054	Infectious disease	-	negative
SDLDBAQKEYKL	f	060-064	Infectious disease	-	negative
KZKMXUWMHQYT	f	045-049	Emergency	negative	-
KPWPLJDLQQWG	f	035-039	Emergency	negative	-
THMQKJWJQLHF	f	080-084	Emergency	-	negative
WXDIGZFSPDEU	f	035-039	Emergency	-	negative
WWMKRZVFEFFG	m	080-084	Emergency	negative	-
HLLFGQWGIYSL	m	070-074	Infectious disease	negative	-
EGAPIUJUYGGO	m	045-049	Emergency	-	negative
LKNMZLUPTMUC	f	075-079	Emergency	-	negative
VKSHNWYNYESI	f	050-054	Emergency	-	negative
CTXSFWGVDGIG	m	045-049	Emergency	-	negative
EKLYXIIXHOUR	m	060-064	Emergency	-	negative
REGJDRDRIESU	m	060-064	Emergency	-	negative
SJUEWQUKWUIF	f	080-084	Infectious disease	-	negative
PJCXKKJNTPFG	f	035-039	Emergency	negative	-
JSVHMKIMVFWR	f	035-039	Emergency	-	negative
LDOWPVHWQHBN	f	060-064	Infectious disease	-	negative
FLMFCUMMHBLQ	f	025-029	Emergency	negative	-
KEVUNQCWPECE	f	085-089	Emergency	-	negative
KRMRVIWZOKUI	f	070-074	Emergency	-	negative
PEZFXDXDEHQN	f	040-044	Emergency	-	negative
QBRYQOZMEWPK	f	080-084	Infectious disease	negative	-
OVFNIRWOQYFA	m	045-049	Emergency	-	negative
DVMCZBDMNLRA	f	045-049	Emergency	negative	-
LDBRXTDKHMNP	f	070-074	Emergency	-	negative
UFZSNTNHLKVF	f	070-074	Emergency	-	negative
KXVXXTQDLQCI	f	025-029	Emergency	negative	-
UOFTXJVBXYUY	f	030-034	Emergency	-	negative
CVIQXHPTXOAE	f	045-049	Emergency	-	negative
DJOYCKTCVMKM	f	055-059	Emergency	-	negative
TZDWOGPYALQK	f	040-044	Emergency	-	negative
NWMANZSWLBQN	f	075-079	Emergency	negative	-
VSEKJATFONBH	m	075-079	Infectious disease	-	negative
UZJWTPOBKRLR	f	030-034	Emergency	negative	-
ZNVRRGNFMPNE	m	030-034	Emergency	negative	-
ERBSIIKVDZPJ	f	075-079	Emergency	-	negative
ZRXQLEPBQLTI	m	035-039	Infectious disease	-	negative
PJZQEUMONNGM	m	055-059	Emergency	negative	-
SSDMPRFLDWQQ	f	075-079	Emergency	-	negative
NOAEMLSPRUBU	m	020-024	Emergency	-	negative
NGTNXGNIJWVC	f	075-079	Emergency	-	negative
LPJMWBLJAKQI	f	090-094	Emergency	-	negative
HIETTBXRMJWN	m	050-054	Emergency	negative	-
DXSTDNIDPHCI	m	020-024	Emergency	-	negative
USRACODRPZKI	f	030-034	Emergency	-	negative
QDOAKEBETMCM	f	035-039	Emergency	negative	-
SGFYMGLZCVGV	m	060-064	Emergency	-	negative
NYGZXMNKADXH	m	030-034	Emergency	negative	-
ILCZSIWCFEQG	f	025-029	Emergency	negative	-
VAUUXOKJKSHF	m	070-074	Emergency	-	negative
GOZYXCIGNYHY	m	035-039	Emergency	negative	-
OZLPVCQSMUSX	f	055-059	Emergency	negative	-
KXSICYKCQWSF	f	035-039	Emergency	negative	-
FIKQZSWRUTFD	f	035-039	Emergency	negative	-
KLKSJQFYGVFX	f	045-049	Emergency	-	negative
QFAPQGTOADFO	m	080-084	Infectious disease	-	negative
YWUDGYHBTIGR	m	085-089	Infectious disease	-	negative
RYZIGEHTDAYZ	f	075-079	Emergency	-	negative
ACEFXERRIAZC	f	090-094	Infectious disease	-	negative
SGKBVAQHDFYU	f	045-049	Infectious disease	-	negative
XDJQKEWDBKWN	m	045-049	Infectious disease	-	negative
ZQKUXENLFGBG	f	045-049	Emergency	-	negative
CKVWLFLAAOAV	m	070-074	Emergency	negative	-
DRILYOGKDNET	f	030-034	Emergency	negative	-
QREZFOBKENEK	f	090-094	Emergency	-	negative
LKEXCVJMGRNN	f	030-034	Emergency	-	negative
BTHWYDWLNWBV	m	025-029	Emergency	negative	-
CEIRQYHGWPTK	f	060-064	Emergency	negative	-
WAJNAPCZMKWU	m	080-084	Emergency	-	negative
YMEILLTKTLXI	m	085-089	Emergency	-	negative
GTZBFRHAHTMU	m	020-024	Emergency	-	negative
TRNLEXEFHALF	m	085-089	Emergency	-	negative
FMWIBXMLYKYQ	f	075-079	Emergency	negative	-
PVSKKMURCXEI	m	025-029	Infectious disease	-	negative
LJXTAKBDQAWM	m	085-089	Emergency	negative	-
FYXLSDQQVHZI	f	035-039	Emergency	negative	-
YJRUSCCOAMPY	m	080-084	Emergency	-	negative
GOSLDRGYHSRS	m	060-064	Emergency	-	negative
WDBRDYIDDAOH	m	075-079	Emergency	negative	-
SECVREWIYAYF	f	080-084	Emergency	-	negative
KUNRPVVMHCOG	m	075-079	Emergency	-	negative
RJLGTUHUFGBC	f	090-094	Infectious disease	negative	-
CGIISXNZIQJM	f	045-049	Infectious disease	-	negative
GVIBLBRGVKAL	f	080-084	Infectious disease	negative	-
FBRVEECYMKIK	f	075-079	Emergency	negative	-
WRJIHAMBXBMX	f	060-064	Emergency	-	positive	no
WCLGBICKUGMF	m	050-054	Emergency	-	positive	yes
TSVTBFJZUQUM	f	085-089	Emergency	-	negative
XJQHKYCMURDS	f	035-039	Emergency	-	negative
BXVMTBYIAWAR	m	085-089	Emergency	negative	-
OYBGARMCXNIR	m	085-089	Emergency	-	negative
MBJVYRMWJEOE	f	080-084	Infectious disease	-	negative
RLXKGXPXBEMY	f	095-099	Emergency	-	negative
JBLOGQGMKSHT	f	040-044	Emergency	-	negative
EBTEKHCBXRJL	m	090-094	Infectious disease	negative	-
NSJIHSDNNVWI	m	070-074	Infectious disease	negative	-
GGBVYJDHAXSJ	m	055-059	Emergency	negative	-
EOIHGEZAMFQQ	m	050-054	Infectious disease	-	negative
BQECGGFXOAYP	f	025-029	Emergency	-	negative
KUAZEQWXRQIM	m	090-094	Emergency	-	negative
ZTIJTLVSFTLU	f	080-084	Infectious disease	negative	-
UALHJGPSROYK	f	040-044	Infectious disease	-	negative
KKMXOHYZRQMM	m	085-089	Infectious disease	-	negative
MIHKHSCBMCUX	f	045-049	Infectious disease	-	negative
GATMYRPGQQIA	f	090-094	Infectious disease	-	negative
QEMWYPIYCSYM	m	055-059	Infectious disease	-	negative
EPKAWLFRJHJU	f	065-069	Infectious disease	-	negative
CHIQHJVNUZMC	f	035-039	Emergency	negative	-
HTUSOXFSRAGM	f	085-089	Emergency	-	negative
FPLYEYNMDLMD	f	075-079	Emergency	-	negative
XXJYZYVIDPDO	f	040-044	Emergency	-	negative
PEQZCIVETUIT	f	055-059	Emergency	-	negative
MSZYNOTTOQEP	m	075-079	Emergency	-	negative
CLZMYEHGUJSG	f	035-039	Emergency	negative	-
DMUEKBSQBUGV	f	055-059	Emergency	negative	-
RLAOVLZYTTBY	f	085-089	Emergency	-	negative
CLBQVFGBKFAJ	m	085-089	Emergency	negative	-
MDJRIAFGZWNW	m	025-029	Emergency	negative	-
NDBRHGQHWSEJ	m	045-049	Emergency	-	negative
ROFGUMQZQFJI	f	080-084	Emergency	negative	-
GWPPNZUNHNET	f	035-039	Emergency	negative	-
WIGNIDGHENIX	m	065-069	Emergency	-	negative
TPYRVTNAWEJK	f	025-029	Emergency	-	negative
VVKTBOHPSYLO	f	080-084	Emergency	negative	-
EBGQEGBPSSYR	f	025-029	Emergency	-	negative
LKIWYKSKCYOV	f	030-034	Emergency	-	negative
PORVXARVMUYE	m	060-064	Emergency	negative	-
FFBLHDSLTKQE	f	060-064	Emergency	negative	-
TAVIZPJBYBIA	m	040-044	Emergency	negative	-
JCEVWMOKPATZ	f	055-059	Infectious disease	-	negative
CRERAOSQZXRC	f	020-024	Emergency	positive	-	no
GHCYMOHEIVCW	f	025-029	Infectious disease	-	negative
SASFIAIOMBCB	f	045-049	Infectious disease	negative	-
ZNYRDJEIUFHT	f	020-024	Emergency	-	negative
EFHAEBRVDCIZ	f	025-029	Emergency	-	negative
LPMKICZIUPCV	m	035-039	Infectious disease	negative	-
SVFOWJTFLBIV	m	065-069	Emergency	-	negative
VXWNYWHZJVOP	m	050-054	Emergency	-	negative
RPVMZMMAPYBJ	f	030-034	Emergency	negative	-
EPSWXZQTZDJZ	f	070-074	Emergency	-	negative
PHDCIQLCVLFH	f	045-049	Infectious disease	-	negative
NWIQTFEMMBMK	m	070-074	Emergency	negative	-
KFHERUHVARNG	m	030-034	Emergency	-	negative
XBOYOHNYURBY	m	035-039	Infectious disease	negative	-
WJCKZLHDRKYM	m	075-079	Infectious disease	negative	-
HXUBGCRCCOER	f	030-034	Emergency	-	negative
DJFFFBHFTUCN	f	030-034	Emergency	-	negative
JYCLKBHQLZBI	m	065-069	Infectious disease	-	negative
LRXNWOHOXGIJ	m	050-054	Emergency	-	negative
OVDRPJOCRTDZ	f	050-054	Emergency	-	positive	yes
MZYXCTCPUMBI	f	020-024	Emergency	negative	-
CJQIVTHIMRLA	f	090-094	Emergency	-	negative
XHDAYLCPYXPF	f	085-089	Emergency	negative	-
TPECCJDFPBZS	m	070-074	Emergency	negative	-
YBKSUZDKWEWC	f	070-074	Infectious disease	-	negative
NZYKSDUHJSPT	f	040-044	Emergency	negative	-
JIECWLMAWDSG	f	055-059	Emergency	-	negative
ZRZAAOZDUNXX	m	040-044	Emergency	-	negative
ZQGPRASIDYYX	f	070-074	Emergency	-	negative
UMRMJWLDZLEY	m	050-054	Emergency	negative	-
FEDCLWIZGCFL	m	075-079	Emergency	negative	-
MENRIWECKECG	m	075-079	Emergency	-	negative
QGXNPGHYXCNJ	f	025-029	Emergency	-	negative
BVFHWNYSMZUK	f	080-084	Emergency	-	negative
OAZSELQHFXUK	m	085-089	Emergency	-	negative
LPVXJPMOLROB	f	090-094	Emergency	-	negative
FQIEADWDIFFZ	f	085-089	Emergency	-	negative
VRKYQMBDGTCM	f	080-084	Infectious disease	-	negative
CKPHJOCEQTIZ	f	040-044	Emergency	negative	-
UXQZYCTJASMU	f	035-039	Emergency	-	negative
DJDRSMVQTLAW	m	075-079	Emergency	-	negative
QLBECHSEZOZG	m	050-054	Emergency	-	negative
VDZJPHJXOVDN	m	080-084	Emergency	-	negative
AUKVXIVPFOIL	f	080-084	Infectious disease	negative	-
UAVKBXJFXXOL	f	030-034	Emergency	-	negative
IAOXKSSRTXQB	f	030-034	Emergency	-	negative
ANWEHHQMWZFC	f	075-079	Emergency	negative	-
ZHVVNEOFTSLA	f	090-094	Infectious disease	-	negative
RLWZADGKPJMR	f	040-044	Emergency	negative	-
HAUZYJUCQHGO	m	065-069	Emergency	negative	-
URMZKRYWWQCI	m	040-044	Emergency	-	negative
BWCXPOQAKVKV	f	075-079	Emergency	negative	-
NXFICZZCCBNJ	f	025-029	Infectious disease	-	negative
WDSIRQFKPRQS	f	030-034	Emergency	negative	-
GEHNJAIIYWET	m	040-044	Emergency	negative	-
DZMUCEHUQDPD	f	025-029	Emergency	-	negative
VXLVTWIKLDGF	f	080-084	Emergency	-	negative
JLASMHGDHOUQ	f	040-044	Emergency	-	negative
BPSLZFFQXTHA	m	045-049	Infectious disease	-	negative
HPRVJUIWZOOC	f	090-094	Infectious disease	-	negative
VNXHODDCLVEF	m	025-029	Emergency	-	negative
UMUWTOLJCHLV	m	065-069	Emergency	negative	-
KDUMUTNMXQDD	f	065-069	Emergency	negative	-
BIPBUITKJWCY	m	035-039	Emergency	negative	-
EPQTYLLBSMLH	f	030-034	Emergency	-	negative
KQAQWOLBNZCP	m	035-039	Emergency	negative	-
DKKZTTPHYWVS	f	060-064	Emergency	negative	-
NAJBXAZISLRR	f	025-029	Emergency	negative	-
JIOFWAQQVSKW	m	095-099	Emergency	negative	-
DLGBKCFULMKG	f	050-054	Infectious disease	-	negative
PJKTISBGAGAC	f	035-039	Emergency	-	negative
JMTSBWRWMFFQ	f	065-069	Emergency	-	negative
DBKUZOCNNULH	f	090-094	Infectious disease	-	negative
IZCKIRVBCTVS	f	065-069	Emergency	negative	-
KBUKKGAYCIRY	m	055-059	Emergency	-	negative
BFZSXLZNCONC	m	045-049	Emergency	-	negative
LIQSYKRQCWTW	m	075-079	Emergency	negative	-
IGPPGHJJACTL	m	090-094	Emergency	-	negative
VCDHRSKYQARW	f	030-034	Emergency	negative	-
XLIUAFBALWNR	m	030-034	Emergency	-	negative
JPQJZBIOWFXC	f	045-049	Infectious disease	-	negative
DRVJFMKDESZU	m	080-084	Emergency	-	negative
BLSGRIBGWDIK	m	030-034	Emergency	-	negative
ANSVFGCMZSXU	f	040-044	Emergency	negative	-
CXSAYJFKKADN	f	090-094	Infectious disease	-	negative
HNEKXRWBDMCM	m	030-034	Infectious disease	-	negative
UEJBDTSOJDDQ	f	040-044	Emergency	negative	-
AABVZBLXQOAW	f	040-044	Emergency	negative	-
RHAVVELYKCIZ	m	040-044	Emergency	-	negative
EAEVJQHJUAUR	m	055-059	Emergency	-	negative
ORBQOCBSBAPD	m	065-069	Emergency	negative	-
NIUOMVLFZQZI	f	075-079	Emergency	-	negative
FFEPZCUUQKQB	f	030-034	Emergency	-	negative
CYSTKMIOVWJB	m	055-059	Emergency	-	negative
IERNSOSTNZLK	f	055-059	Emergency	-	negative
YCZPWYWBZQFO	m	070-074	Emergency	-	negative
HLFKJEANBJEC	f	095-099	Infectious disease	-	negative
XQWMFKIYWTDQ	m	070-074	Emergency	-	negative
XVJYBIRBKXMI	f	040-044	Emergency	-	negative
VXCCQVNGFHRO	m	035-039	Infectious disease	-	negative
VIIDIQCIHIDA	f	020-024	Infectious disease	-	negative
NJDKETHMNJBC	m	065-069	Emergency	-	negative
LPAGQRUGFGNF	m	080-084	Emergency	negative	-
UNZUVJYBCJKI	f	040-044	Emergency	-	negative
QYBKLKVGJFFV	f	080-084	Emergency	negative	-
ZKUNXBWBQYEP	f	040-044	Emergency	negative	-
VPPMEDACMVDG	m	045-049	Emergency	negative	-
CNWULQBEHKSE	f	080-084	Infectious disease	-	negative
EGDXZWQBDAFO	f	085-089	Emergency	-	negative
PNWQVTUTPYXT	m	030-034	Infectious disease	-	negative
ODUDAVBOHCZF	m	080-084	Emergency	negative	-
EZYTTNIAWYMA	m	045-049	Infectious disease	-	negative
CAUQYQZTBYZC	f	080-084	Infectious disease	negative	-
OQIMNNFEUNNP	m	055-059	Infectious disease	negative	-
FZIYCDIXHDIY	f	030-034	Emergency	negative	-
GODNRNFOOKNP	m	070-074	Emergency	negative	-
LGOKZIYLFOSO	f	040-044	Emergency	negative	-
VKARGPAKKEIH	m	050-054	Emergency	-	negative
JMAABLQNGMWF	m	020-024	Infectious disease	-	negative
HPOTXLVAXBOZ	m	070-074	Emergency	-	negative
ESISOGPNAWBN	m	025-029	Emergency	-	negative
SMGKAIHYBRFJ	m	090-094	Emergency	-	negative
HYCIVKNZYITM	m	085-089	Emergency	-	negative
PKWCHWQLVOCT	m	025-029	Emergency	negative	-
AWDDZJANIPGW	m	040-044	Emergency	-	negative
DWPYPSAQNQLB	f	035-039	Emergency	-	negative
QOIADHSYLKXH	f	035-039	Emergency	-	negative
CZTLCUDFRIFZ	m	055-059	Emergency	-	negative
DILYGUJYILHZ	f	035-039	Emergency	-	negative
FGZVRJXEITSR	f	090-094	Infectious disease	-	negative
MYPUPSNNCRZG	f	065-069	Emergency	negative	-
MEVJKTCZHRAO	m	045-049	Emergency	negative	-
NXBQZFWJHLGS	m	080-084	Emergency	-	negative
YCQLMRNIVBDK	f	035-039	Emergency	negative	-
UVGQBXZMWYPR	f	070-074	Infectious disease	-	negative
DRMJJHYXZKFL	m	040-044	Emergency	negative	-
WLNTHTFVLJPJ	f	035-039	Emergency	negative	-
NFKGGZWVDJEF	f	030-034	Emergency	negative	-
XTJFORJLYVIN	f	030-034	Emergency	negative	-
YVFJIRGSATOK	f	030-034	Emergency	negative	-
QNLTIIZBTODL	m	035-039	Emergency	negative	-
BNYFZBWAFVJZ	m	050-054	Emergency	negative	-
HXXEGXPZJQOZ	f	020-024	Emergency	-	negative
ZIVTNIUJHWOO	m	085-089	Emergency	-	negative
MYGXURHNFMDG	m	060-064	Emergency	negative	-
NXRRMLIIVXTF	m	075-079	Infectious disease	-	negative
XTFNIZOMZDBO	m	060-064	Emergency	-	negative
GPKHKXZHAXIC	m	050-054	Emergency	-	negative
ODTDCUZRLVGW	f	075-079	Emergency	-	negative
IVSBEAYLAWBM	m	075-079	Emergency	negative	-
MXYBFCOTYZIV	f	080-084	Emergency	negative	-
TUAOQMGNOOBY	f	030-034	Infectious disease	-	negative
DANEFVQWGWVX	f	045-049	Infectious disease	-	negative
SWYWKESAQHZX	m	060-064	Emergency	negative	-
CUIBQARCXHBS	f	080-084	Infectious disease	-	negative
TDKVSPRAQQWM	f	020-024	Emergency	negative	-
RUWOMSOGJBVQ	m	025-029	Emergency	negative	-
EBYDZMLJZXCP	f	025-029	Emergency	negative	-
EXMUHWDEKDHF	m	090-094	Emergency	-	negative
AHZPUARFSZBV	m	080-084	Emergency	-	negative
ZYDLRHCOJGJS	f	035-039	Infectious disease	-	negative
XCYPAVRQDMLT	f	025-029	Emergency	negative	-
DEGVIKCQIKDI	m	040-044	Emergency	negative	-
EVIGDLIWJFKZ	f	045-049	Emergency	negative	-
JWNKVKGLRGQG	m	025-029	Infectious disease	-	negative
HPYWNWZZNZED	m	060-064	Emergency	-	negative
YSPZUBNISQEK	f	055-059	Emergency	-	negative
AHJWBUJUKFRG	m	040-044	Emergency	-	negative
LNWWLHGKOGWG	f	090-094	Emergency	-	negative
KNAOJXGZHLPG	m	085-089	Emergency	-	negative
ESUBAMFXVLEJ	f	025-029	Infectious disease	negative	-
JCOSWZSMQGDJ	f	085-089	Emergency	-	positive	yes
NCNGBXPWAJPR	m	085-089	Emergency	-	negative
CCORIDKGZKKV	f	030-034	Emergency	negative	-
QZMIEVLHZKBB	m	085-089	Infectious disease	-	negative
NVRDLMBMRNWV	f	040-044	Emergency	negative	-
QAQLOCDGFCZV	m	030-034	Infectious disease	-	negative
IKXJBYXWJTZL	f	030-034	Infectious disease	-	negative
UEMWMUNJYYJT	f	085-089	Emergency	negative	-
TFBREKLJITKA	f	030-034	Infectious disease	-	negative
SIJDHIDJXXON	m	035-039	Emergency	negative	-
AYETRRTRKTMS	m	080-084	Emergency	-	negative
EXEYUHLEKPUE	f	045-049	Emergency	negative	-
AFFPDDEIXMRW	f	040-044	Infectious disease	-	negative
NTIXPPKRHMXK	m	040-044	Emergency	-	negative
LRUJNFQUBMDF	m	045-049	Emergency	-	negative
CIVBFBVZMLGK	f	040-044	Emergency	negative	-
XRHZLHYLPYVF	f	030-034	Emergency	negative	-
QBLMUVMMNJPV	f	050-054	Emergency	negative	-
BZNSZWIRDSYI	m	070-074	Emergency	negative	-
NCPOUPCATMNY	m	080-084	Emergency	negative	-
SXPIPXXUWAIJ	m	060-064	Infectious disease	-	negative
ZZCSCECFSNON	m	025-029	Emergency	negative	-
YUAPWJMIYOFL	f	020-024	Emergency	-	negative
UPDTOXDDWOFY	m	075-079	Emergency	-	negative
OAXGVEMTSTGY	f	030-034	Infectious disease	-	negative
WMISPJGOHBBY	m	055-059	Emergency	-	negative
OGAFTXMABWGG	f	035-039	Emergency	-	negative
WNSACITMGSJQ	f	090-094	Emergency	negative	-
GYLNDLONCVXI	m	060-064	Infectious disease	-	negative
VGEVTVPXGTNE	m	045-049	Emergency	negative	-
YSDNOPNVRIBM	f	030-034	Emergency	negative	-
PPZQEBHPFIVS	f	030-034	Emergency	negative	-
LYBFNJNRYTEI	m	035-039	Emergency	negative	-
HHCDCSGITSIF	f	050-054	Emergency	-	negative
LOAQTUXGJYJN	f	025-029	Emergency	negative	-
KNVSFUYDAQCA	m	055-059	Emergency	-	negative
QBIITCXLRHDN	m	035-039	Infectious disease	negative	-
BUEOPQQGGVQH	m	030-034	Emergency	-	negative
CYECPDFJDAEI	m	035-039	Emergency	-	negative
KJUCEPESSJCF	m	075-079	Emergency	-	negative
THVLDRFWNSAY	m	040-044	Emergency	-	negative
ECYUYBJQUDWE	f	080-084	Infectious disease	-	negative
OMJRUHVJAPNP	m	050-054	Emergency	positive	-	yes
BEAUNOXFVSHK	m	070-074	Emergency	-	negative
VIAHTAIQLTCO	m	095-099	Infectious disease	-	negative
PJNPXSLOVIAO	m	060-064	Emergency	-	negative
BKCFIVWUADGI	f	085-089	Emergency	-	negative
RDOAPANBDQQP	f	020-024	Emergency	-	negative
LNZWEOGKZNED	m	030-034	Infectious disease	-	negative
MLGEBHQTDHWJ	f	080-084	Emergency	-	negative
SGEYRPVUWDMK	m	080-084	Infectious disease	-	negative
UXVWDUBURXYC	m	080-084	Infectious disease	negative	-
ZPEBOLJBZSSW	m	025-029	Emergency	negative	-
RRESWTQABNRD	m	055-059	Emergency	-	negative
IFUGFVLYUUVV	f	085-089	Emergency	-	negative
BBJMSPXAMVBZ	m	055-059	Emergency	-	negative
XAIVHHIYNQBV	f	070-074	Infectious disease	negative	-
RHJRJFYNPLLL	f	075-079	Infectious disease	negative	-
IUMLHMXHNRCR	f	075-079	Emergency	-	negative
ZLPKXPYDFIVA	f	095-099	Emergency	-	negative
NODMFYBOLRSS	m	075-079	Emergency	-	negative
SOLLXNUAOQIM	f	075-079	Emergency	negative	-
QDRBMBNZZAYY	f	050-054	Emergency	negative	-
ZORGIWKVTAZZ	m	080-084	Emergency	negative	-
VOLAUCMIRFSZ	f	055-059	Infectious disease	-	negative
DMPXJVWAQSBC	m	070-074	Emergency	-	negative
ENKGXQBNLOWT	m	080-084	Emergency	negative	-
IWCCVWGSPZHN	m	055-059	Emergency	-	negative
HQNWWMYDTFSH	m	060-064	Emergency	negative	-
UUHANJUUQRPS	f	070-074	Emergency	-	negative
GYSLELQVUXOZ	m	070-074	Emergency	negative	-
SHBNOAIVDDCP	m	035-039	Emergency	-	negative
ZTELGIFRRQYO	f	025-029	Emergency	negative	-
AYUZINTUAVXC	m	080-084	Infectious disease	-	negative
FHTJWSPCSMTR	f	055-059	Emergency	negative	-
CIITCEUVRLYF	f	055-059	Emergency	negative	-
PYVPHCQSOQXF	f	080-084	Infectious disease	-	negative
GITHVMXWOXYB	f	045-049	Infectious disease	-	negative
WEKBSTTASRCP	m	035-039	Emergency	negative	-
NXHOJCXMQQCK	f	070-074	Emergency	negative	-
MTZJSEBQRUGE	f	050-054	Emergency	-	negative
JOZJQSVNRYZB	m	080-084	Infectious disease	negative	-
XABDFJWXJATP	m	025-029	Emergency	negative	-
TZNKAKRIWDAU	f	020-024	Emergency	negative	-
UAIAGZYKYMOI	m	070-074	Emergency	-	negative
YYIYZMFFIMLQ	m	045-049	Emergency	negative	-
WUMVNEJVVZCD	f	030-034	Emergency	-	negative
JAEEUITQQNKT	f	060-064	Emergency	-	negative
JBWRZDCPHAWU	f	030-034	Infectious disease	-	negative
VUCXRQRBALMB	f	055-059	Infectious disease	-	negative
OSOJODLHUACG	m	040-044	Emergency	negative	-
NCIHCWAUWKWO	m	055-059	Emergency	-	negative
HNUEOFEMMZRJ	f	080-084	Emergency	-	negative
ISVDTRRBGRUU	m	070-074	Emergency	negative	-
AHIQSGOOJYDC	f	080-084	Emergency	negative	-
WNRKQNBFEYQX	f	060-064	Infectious disease	-	negative
IXEAAVRLTVFZ	f	040-044	Infectious disease	negative	-
RNEDQUDHUMPV	m	070-074	Emergency	-	negative
YUOQJVPNAUSF	f	030-034	Emergency	negative	-
BXYIEZHOKVKZ	f	035-039	Emergency	-	negative
TQUIICFQMOVQ	m	045-049	Emergency	negative	-
RGKEFMKHQGWO	f	035-039	Emergency	-	negative
KAYUERZLBVRF	f	095-099	Emergency	-	negative
CBJSOXWEUYCW	m	065-069	Emergency	-	negative
QFDFNJMNOBQJ	m	070-074	Emergency	-	negative
BFRUFGDTCDFN	f	050-054	Emergency	negative	-
VVQZFXEGVYPF	m	075-079	Emergency	-	negative
CJVBHQXPLRDR	m	080-084	Infectious disease	-	negative
UXCFFNXVULMH	f	080-084	Emergency	negative	-
LDPYLLPQQTAH	f	030-034	Emergency	negative	-
EQMLXJAUOBWE	f	065-069	Emergency	negative	-
FVVEDMBCTDJW	m	070-074	Emergency	-	negative
RTPBVDRVTKVJ	f	030-034	Emergency	-	negative
FSZDUFQCURIN	f	090-094	Emergency	-	negative
FQTXLLRGNXIH	f	035-039	Emergency	negative	-
APITQPDQOBUN	m	070-074	Emergency	-	negative
AUJSFBQWBSTL	f	090-094	Emergency	-	negative
TFHUZMTUPRLR	f	065-069	Emergency	negative	-
PMAJGVFHDFZN	m	025-029	Emergency	-	negative
WKTHRPFMLUTS	f	055-059	Emergency	-	negative
BNGKPIURFQSA	m	055-059	Emergency	-	negative
FWCIPLBDOUSR	f	080-084	Emergency	negative	-
EGNOUXTMOTMW	m	080-084	Emergency	negative	-
EBTXUUNYPAFL	f	055-059	Emergency	-	negative
EGROWHVHMCCJ	f	030-034	Emergency	negative	-
VHCKMRMJNZVY	m	075-079	Emergency	-	negative
XLSXOVTDBLCQ	m	090-094	Emergency	negative	-
LMZISBIZQDUK	m	075-079	Emergency	-	negative
ITAVZYAWCNVX	f	060-064	Emergency	-	negative
PDHJABRRKMGE	m	085-089	Infectious disease	-	negative
LMMLRNXWEHRR	m	030-034	Emergency	-	negative
LITURFTOCSTO	f	025-029	Infectious disease	-	negative
EVBARWAGQQYX	f	055-059	Emergency	negative	-
BAAVHOKZZHBK	f	085-089	Infectious disease	negative	-
LOPQGSZXSXKL	m	045-049	Emergency	negative	-
CQGOXCKSJYCK	m	040-044	Infectious disease	negative	-
LQBDHVQSYLKN	m	025-029	Emergency	negative	-
EBMFIDLNJLNO	f	055-059	Emergency	negative	-
YBMXQPTQNAJG	f	045-049	Emergency	negative	-
RWYMBQUDJMJB	f	070-074	Emergency	-	negative
RLAYZZDQLQOT	f	030-034	Emergency	-	negative
HEGTEAAXJMNM	f	065-069	Emergency	-	negative
RJKAFGUVXAUA	m	070-074	Infectious disease	negative	-
TQEYZWEGBZCZ	m	080-084	Infectious disease	-	negative
HDDYZEZYLZQB	f	085-089	Emergency	negative	-
QTQOJWQOXWFK	f	090-094	Emergency	-	negative
RXNKXKBOJFRP	m	070-074	Emergency	-	negative
OZIGOQNWPSCY	m	080-084	Emergency	-	negative
JQMNEJHHPEZC	f	030-034	Emergency	negative	-
WEYRWZYXIKKD	f	075-079	Emergency	-	negative
TQDXGMDPKMGB	f	040-044	Emergency	negative	-
MDDFUKHESXLY	f	055-059	Infectious disease	-	negative
JZBWEWDZZXCV	f	050-054	Infectious disease	negative	-
OQVXKWRRLQMU	f	060-064	Emergency	-	negative
UCFNOJWPKUAU	f	080-084	Emergency	negative	-
IKGOYOHNMZNM	f	080-084	Infectious disease	-	negative
KEHEZIEZNLYJ	f	095-099	Infectious disease	-	negative
XKVTSROCBZUP	m	055-059	Emergency	negative	-
FGQNRRXUSMWI	m	040-044	Infectious disease	negative	-
OGECJBYSLZTP	f	070-074	Emergency	-	negative
CVLWSTUMYJLD	m	020-024	Emergency	-	negative
HOATREYGLWPB	m	025-029	Emergency	-	negative
QICAOIUUUDGB	m	080-084	Emergency	-	negative
PLECHRUIGNTB	m	040-044	Emergency	negative	-
BWNJOOVLHDDS	m	045-049	Infectious disease	-	negative
XMPOUGUUXHOJ	f	075-079	Emergency	-	positive	yes
ZTTBIOTXDZRY	f	075-079	Emergency	negative	-
WTDWHUPAEFJY	m	055-059	Emergency	negative	-
CBVROIFHIITH	m	075-079	Infectious disease	-	negative
TVZZWPQNPTGP	f	080-084	Emergency	-	negative
HIQZCUKBXRMU	m	075-079	Emergency	-	negative
IDWQQXEKKMHL	f	090-094	Emergency	negative	-
YPNAYUXNPYUU	f	080-084	Emergency	negative	-
DOELJGVAUWRO	f	085-089	Infectious disease	-	negative
XMHIPNMLIDSO	f	025-029	Infectious disease	-	negative
ROEWZXDSZBGG	m	085-089	Infectious disease	-	negative
RKJUFGHTXTAH	f	055-059	Emergency	-	negative
TATJGNHMAKAL	m	075-079	Emergency	-	negative
RUAELPVBGTJI	m	070-074	Infectious disease	-	negative
ACYPAGVVHQPM	m	030-034	Emergency	negative	-
ARAIQKYWSUFB	m	035-039	Emergency	negative	-
QLTWHDEPBMGC	m	035-039	Emergency	negative	-
CWLKJEWUXDBE	f	045-049	Emergency	-	negative
KTISBCSBBBAS	m	075-079	Emergency	-	negative
PFURBRMRCWLB	f	080-084	Emergency	-	negative
RUUGCTORUPSS	m	050-054	Emergency	-	negative
GHWXQRPFUXQK	m	085-089	Emergency	-	negative
WTUUJDIZTLGM	f	060-064	Infectious disease	-	negative
ZRIPAKGBPHTK	f	085-089	Emergency	-	negative
XMPKDIIBIYKG	f	085-089	Emergency	-	negative
SSHLYYIBGEKQ	m	055-059	Emergency	-	negative
MOZUWLSYITFD	f	070-074	Emergency	negative	-
BIFWQNEAHKSD	f	020-024	Emergency	negative	-
KLEGPLLJDNUZ	f	030-034	Emergency	negative	-
MYODSXPIDBMB	m	030-034	Emergency	-	negative
TDANHEOAFOAC	f	040-044	Emergency	-	negative
BRUVTZMSJDKC	m	040-044	Infectious disease	-	negative
EBOAQFJWKHCF	f	035-039	Emergency	-	negative
FWNXQXARLFPD	m	050-054	Emergency	-	negative
MZYKDQIXDJQO	m	070-074	Emergency	-	negative
MKPWGZFGCHOD	m	040-044	Emergency	-	negative
DZWRBMBRUMUU	f	030-034	Emergency	negative	-
RRPDHKGXVBRR	f	025-029	Emergency	negative	-
OLQAQOMKBXHM	f	020-024	Infectious disease	-	negative
TZHSTUNVNATA	m	075-079	Emergency	-	positive	no
MYLVVAOANPZZ	m	085-089	Emergency	negative	-
IKXYXVXHUKCX	f	035-039	Emergency	-	negative
DGVASAKSPXCZ	m	045-049	Emergency	-	negative
TCKZJEGMBPJA	f	075-079	Infectious disease	-	negative
SZXDWVRQXVQT	m	050-054	Emergency	-	positive	yes
ROGVOIHGQGHD	f	030-034	Emergency	-	negative
UPJPXKSRCWUD	f	030-034	Emergency	negative	-
ELKJRWTSAUJW	f	030-034	Emergency	-	negative
OHQELLWZRSAC	f	035-039	Emergency	negative	-
CWOLATKTGRPZ	m	030-034	Infectious disease	-	negative
WIPOXTHISTXR	f	025-029	Emergency	negative	-
KYJXKCWPMOCC	m	040-044	Emergency	negative	-
IGNDMNXMLGCM	m	040-044	Emergency	-	negative
OVUFVDNCPJNO	f	030-034	Emergency	negative	-
IXJZAQLJBKJR	m	055-059	Infectious disease	-	negative
UEHRENUYERAZ	m	025-029	Emergency	-	negative
JJBYFPOCIBOK	m	035-039	Emergency	negative	-
IHQDOMSUJEYW	m	045-049	Emergency	negative	-
HPQKKSELVPEC	f	030-034	Emergency	negative	-
ZWHDFMWHLHNN	f	035-039	Infectious disease	-	negative
PEVJDKPSRJGA	m	070-074	Emergency	negative	-
BSJWYNBILCKO	m	075-079	Emergency	-	negative
ZFMXORTMRVSU	f	030-034	Emergency	-	negative
IICGJILAEREV	m	040-044	Emergency	negative	-
YFLOAENEZEOC	m	075-079	Emergency	negative	-
FPRGMFKQLSSW	m	075-079	Emergency	-	negative
XWWGNVFKDERF	f	075-079	Emergency	-	negative
ZRKGKBUURYFP	m	050-054	Infectious disease	-	negative
ZBUIYJSVPMOQ	m	085-089	Emergency	-	negative
AFYOGDGAGTLU	m	075-079	Infectious disease	negative	-
EUDQPAUSWFFW	f	045-049	Emergency	-	negative
HSGQRJORKISW	m	075-079	Emergency	negative	-
WGXWAESDBPVA	m	060-064	Emergency	negative	-
NRKGOBBVIJBQ	m	065-069	Emergency	-	negative
AUZLHRQJOWSL	m	025-029	Emergency	-	negative
EQKPEQGGBCJN	m	045-049	Emergency	negative	-
CYSPXFKESZBR	f	030-034	Emergency	negative	-
OQJPNYBYEBAW	f	055-059	Infectious disease	-	negative
ITDGOZKETSSY	m	030-034	Emergency	-	negative
ELFFLDOWVBXA	m	035-039	Emergency	negative	-
UDQWRFUJNYQK	m	070-074	Emergency	-	negative
QXILKMOHJARR	f	065-069	Emergency	negative	-
EBULGTPTVBAF	f	020-024	Emergency	-	negative
BTVUGPIXTKAE	m	075-079	Infectious disease	-	negative
TESGTKGDYYOE	f	065-069	Emergency	negative	-
ATFHZPOZFIFD	m	075-079	Emergency	-	negative
YWYIXXKCWYQQ	m	035-039	Emergency	negative	-
NBLYSZVZDXTD	m	090-094	Emergency	-	negative
HNAQWLRAZBBS	m	085-089	Emergency	-	negative
KCIBEPGFVYZA	m	090-094	Infectious disease	-	negative	yes
QKNBXKXDCFIP	m	055-059	Infectious disease	-	negative
ABTIZBIGFMOC	f	055-059	Emergency	-	negative
MUAYVWXDCTJT	m	060-064	Emergency	negative	-
HYVMOKJHVVOD	m	080-084	Infectious disease	-	negative
CKORTJOJBPLJ	f	035-039	Emergency	negative	-
AZPWNIVAWRGW	m	080-084	Emergency	negative	-
DARVQCLXGQIR	m	035-039	Emergency	negative	-
PKQLNHQUSCJT	m	075-079	Emergency	-	negative
PXXAVRTVGQWX	f	035-039	Emergency	negative	-
BCOOKRYCGWDO	f	075-079	Emergency	-	negative
YGFZQEOFUKFS	f	090-094	Infectious disease	-	negative
VTVEDMZNHQZC	f	085-089	Infectious disease	-	negative
ICQBUHYTDVGT	m	045-049	Emergency	-	negative
UBXKUOZZVWJP	f	040-044	Emergency	negative	-
UGEJAFPRBMRB	f	035-039	Emergency	negative	-
QQZURJEMUUSK	f	030-034	Emergency	negative	-
SMOTMOMABTAD	f	035-039	Emergency	negative	-
GPSUVTMICQWV	f	085-089	Infectious disease	-	negative
XXZAISJAMMNA	m	020-024	Emergency	-	negative
SLCFLKTVBZFO	m	025-029	Emergency	negative	-
ZPWVIYWSLRBC	m	070-074	Emergency	negative	-
SSMFAFRUTJUC	f	050-054	Emergency	negative	-
WATJMRXALCHH	m	035-039	Emergency	negative	-
OGGBGKJKPHLU	f	055-059	Infectious disease	-	positive	no
YNKSRSTLFIYB	f	045-049	Emergency	-	negative
SNHHINWFEKVD	m	075-079	Emergency	negative	-
CHOFMFNJFEZW	f	040-044	Emergency	-	negative
NFCZBBVDZNCT	m	030-034	Emergency	-	negative
TTGQPZEPRKYJ	m	035-039	Emergency	negative	-
TCADBAOJJDMV	m	070-074	Emergency	negative	-
RPVWTYIYYFOS	m	040-044	Emergency	-	negative
QZXXQZTVHVLA	f	035-039	Emergency	-	negative
ISQHCZANKUXE	f	055-059	Emergency	-	negative
MEWUUXCGGHLI	f	055-059	Emergency	-	positive	yes
FTWOVTOJSXRI	m	055-059	Emergency	negative	-
OQXTKOFQGIVW	f	090-094	Emergency	negative	-
USPEZKBDMXCP	m	090-094	Infectious disease	negative	-
MTPIPMSSDDPB	f	035-039	Emergency	negative	-
BXULJCUOUWDL	m	045-049	Infectious disease	-	negative
KTBTTCTZAEPX	f	035-039	Emergency	-	negative
MOAJDYKWSZOR	f	090-094	Infectious disease	negative	-
ILNXYWIQBMHP	m	040-044	Emergency	negative	-
BUVQIYPMKIPU	f	085-089	Emergency	-	negative
WYZNDZKFUPPH	f	080-084	Emergency	-	negative
KMROCETSPLIS	m	050-054	Emergency	-	negative
EQXMEFGVEVKY	m	070-074	Emergency	negative	-
KXVUXTAPNNNM	m	025-029	Infectious disease	-	negative
RXEEVLDWANXA	m	065-069	Emergency	-	negative
ROCEBUFVWASY	m	070-074	Infectious disease	-	negative
DNMUCFRZNMMY	m	085-089	Infectious disease	-	negative
FVTHWJLMESIP	f	085-089	Infectious disease	negative	-
JULEOXVMCIAO	f	055-059	Emergency	-	negative
HWWXSHVOYOMU	m	020-024	Infectious disease	-	negative
OQCVPHWFMKPO	f	030-034	Emergency	-	negative
MOJJNXWODKXB	f	035-039	Emergency	negative	-
RGWGMINCENUW	f	085-089	Emergency	-	negative
EXBEXREDTJHF	f	030-034	Emergency	-	negative
DNZMOGOUHKBQ	m	080-084	Infectious disease	negative	-
YUOHJTBIOVWC	m	085-089	Emergency	-	negative
FYFIMMKBKYOJ	m	055-059	Infectious disease	-	negative
QQUKSPHANBRW	f	025-029	Infectious disease	-	negative
IOWPIXVVZZJV	f	030-034	Emergency	-	negative
EIPNZNZIWOMW	m	050-054	Emergency	negative	-
GTYJKLTEKHIT	m	045-049	Emergency	-	negative
AZADMQXKXMVQ	f	040-044	Infectious disease	-	positive	no
WYPLIJUSDYLM	f	090-094	Infectious disease	-	negative
TFKGXWGTBOVQ	m	075-079	Emergency	-	negative
EHVTDBMHHPAZ	m	020-024	Emergency	negative	-
RIGLLWULOJBZ	f	085-089	Emergency	-	negative
RNKAVMTRKNTU	m	080-084	Emergency	-	negative
CSJMIBTYCSOG	f	035-039	Emergency	negative	-
EYPJXMIPXOGK	f	090-094	Emergency	negative	-
EKSFCVYOOXSH	f	090-094	Emergency	-	negative
WXBCCYTSBSMA	m	025-029	Infectious disease	-	negative
SJAWBBJSXGJA	f	085-089	Infectious disease	-	negative
KQFEITTXSXVC	m	055-059	Infectious disease	-	negative
ONMIKSJWRLQF	f	035-039	Emergency	-	negative
UJLYXZFVSXDA	f	085-089	Infectious disease	-	negative
FYWGUGYYYDOQ	m	085-089	Emergency	-	negative
SVOCXNFCKKBV	m	045-049	Emergency	-	negative
OHZWOEWDCRDK	m	030-034	Emergency	-	negative
HOMPJOXULVYW	f	035-039	Emergency	negative	-
CSNKTJZSXKXR	f	025-029	Emergency	negative	-
ZLLLBBGZUAUT	m	065-069	Infectious disease	negative	-
DNMDXHYQSQLU	m	075-079	Emergency	-	negative
FKXITBSVXMKM	f	070-074	Emergency	negative	-
KPJKQCWINRUA	f	030-034	Emergency	-	negative
SXADGSRZHBPE	f	090-094	Emergency	-	negative
VYQUITBJYUMD	m	075-079	Emergency	negative	-
AEPCQGDDRYEE	f	040-044	Emergency	-	negative
MQYECJYDUQCK	f	040-044	Emergency	-	negative
TWDZLRXONMRN	f	075-079	Infectious disease	-	negative
SFDVVKWLMNHX	m	065-069	Emergency	-	negative
IHGVETFKMVYB	f	040-044	Infectious disease	-	negative
BDTVQRYLMWOA	m	085-089	Infectious disease	-	negative
OZSICQKGTEGO	f	060-064	Infectious disease	-	negative
FEZJBETJAPSO	f	085-089	Emergency	negative	-
DISIKIEXTHVO	m	080-084	Emergency	-	negative
CKMFMEDLEGEY	f	040-044	Emergency	-	negative
AENFDQEJBPEN	f	065-069	Emergency	-	negative
VYPOKCUWCTOV	m	025-029	Infectious disease	-	negative
LMDVHXXFHATM	m	035-039	Emergency	-	negative
MNNYTCUOPIJP	m	040-044	Emergency	-	negative
OFMLLHPYGVBQ	f	080-084	Emergency	-	negative
WAOWIAXHAUVZ	f	040-044	Emergency	-	negative
VRCHFTAFDIBG	m	025-029	Infectious disease	-	negative
PRMGCZCTISHL	f	045-049	Emergency	-	negative
TSQKDHSFTNIR	f	045-049	Emergency	-	negative
RYUEWHMHGBME	f	045-049	Emergency	-	negative
BDYRFMVYBXZP	f	090-094	Infectious disease	-	negative
QBSGZXICAOBG	f	075-079	Emergency	negative	-
RTRUIJUHTQDE	m	045-049	Emergency	negative	-
NXZDFGQDQLMB	f	050-054	Emergency	-	negative
XKYBIJLFDULZ	f	090-094	Emergency	-	negative
ZCGDKRUBQBXA	m	060-064	Infectious disease	-	negative
RLURJUGOVLNR	f	090-094	Infectious disease	-	negative
IGVTSPTFRZOE	f	030-034	Emergency	negative	-
WTAACBRDBIIO	f	065-069	Infectious disease	-	negative
PAHRPWQWUOHZ	m	055-059	Emergency	-	negative
DSWJBPKWYTOA	f	045-049	Infectious disease	-	negative
JYITLYOBHXHV	m	020-024	Emergency	-	negative
IDEYHIBVFBLL	m	045-049	Emergency	negative	-
KAPJZQLBEDPL	f	050-054	Emergency	-	negative
FMAHTZWVSQMQ	f	055-059	Infectious disease	-	negative
XMOWISWCVDCR	f	025-029	Emergency	negative	-
KDKQGRSEWVCA	f	030-034	Emergency	negative	-
HPHRJSFOHRPX	m	075-079	Emergency	negative	-
NUBZYCNMRHUE	m	090-094	Emergency	-	negative
AUFHLQUUULND	m	065-069	Emergency	-	negative
JNDUWGRXXLFZ	f	030-034	Emergency	-	negative
TJBFAYZQVAOY	f	030-034	Emergency	-	negative
QJLZHFGCVBFO	f	045-049	Emergency	negative	-
LTCSFMNFDEAL	f	025-029	Emergency	negative	-
NMQLVSLPSZQE	f	075-079	Emergency	negative	-
MCCBOOBWSQEN	m	020-024	Emergency	-	negative
GUTHTXQHQVCB	f	085-089	Emergency	-	negative
TXLCXWMYISXM	m	025-029	Infectious disease	-	negative
FGDFVINHEPOO	m	065-069	Emergency	-	negative
ECZUEHOXIFQU	m	035-039	Emergency	negative	-
CGGFRWKSLCRA	f	025-029	Infectious disease	-	negative
WDVOETGFYMYR	m	025-029	Emergency	-	negative
YBYWRNNSPXTD	m	020-024	Infectious disease	-	negative
IRLXODDQNWIQ	f	085-089	Emergency	-	negative
WDDXYAFMZEQQ	f	055-059	Emergency	-	negative
CJDFZGUVJCZL	f	040-044	Emergency	-	negative
LBSHCCLYAAQO	m	025-029	Infectious disease	-	negative
VGMMHDZPVSOC	f	085-089	Emergency	negative	-
AYNADBJBCETG	m	060-064	Infectious disease	-	negative
RMXSKVMKUYZB	f	030-034	Emergency	negative	-
BRGIGTTHLXYN	f	040-044	Emergency	negative	-
ZEIWIFMRPROW	m	025-029	Emergency	negative	-
OGTSIFXWBBOL	f	055-059	Infectious disease	negative	-
ODMEAELIBLBT	f	035-039	Emergency	negative	-
BJVJZVWIZPME	m	080-084	Emergency	-	negative
LUREAYKYQIVB	m	055-059	Emergency	-	negative
TRPIUENRDYOF	f	090-094	Infectious disease	-	negative
FWNBXEUBAZLU	m	020-024	Infectious disease	-	negative
UYIJAVZEAPGY	m	070-074	Emergency	negative	-
HFQIZDLZCSSA	f	065-069	Emergency	negative	-
LMLGNVIIZIQW	m	070-074	Emergency	negative	-
TKBNGQRRNTID	f	090-094	Emergency	negative	-
FKXPBOGBMOUW	f	035-039	Emergency	-	negative
KPQMGYJSBCJO	f	060-064	Emergency	-	negative
JFCUHZAPJESJ	f	040-044	Emergency	negative	-
SSJFOGFOMNNC	m	080-084	Emergency	-	positive	yes
DVLOXIDUDEHX	f	080-084	Emergency	-	negative
AEYDRNEVMXFZ	m	080-084	Infectious disease	negative	-
VPKYSOWWRAWS	f	085-089	Emergency	negative	-
QVHMMRDIGFEQ	f	075-079	Emergency	-	negative
YYGMJHFALQLR	f	085-089	Emergency	-	negative
LNZIFYEUBITW	f	060-064	Infectious disease	negative	-
INVGXLBYHFGB	m	045-049	Emergency	-	positive	no
SRIYICYSTBNE	f	080-084	Infectious disease	-	negative
IWPCYKVADRGU	m	080-084	Emergency	-	negative
ESRHLMAVITVE	f	085-089	Emergency	negative	-
WBFEDFYCMEDB	f	030-034	Emergency	-	negative
EDENVZAFVUAM	m	075-079	Emergency	-	negative
OICREVSZMYMI	m	075-079	Emergency	negative	-
OUESCKFDZFYF	f	080-084	Infectious disease	-	negative
ETNXFHMYJFOG	m	080-084	Emergency	-	negative
TRSPBAMATYBZ	f	035-039	Emergency	-	negative
IETLVIFYEWXD	m	020-024	Emergency	negative	-
JNZXDDEDITGY	f	060-064	Infectious disease	negative	-
MDXEZVWFGBUI	f	065-069	Infectious disease	-	negative
GPJFFSHPDNSR	f	020-024	Emergency	negative	-
WPQCQFCVCBAK	m	025-029	Emergency	-	negative
ENAEUPQQOVGK	f	035-039	Emergency	negative	-
INVHSQXUECRM	f	030-034	Infectious disease	-	negative
IOTMBBHNDLDA	f	055-059	Emergency	negative	-
XZUKWFBBGOEJ	m	080-084	Emergency	-	positive	yes
ONSXJOYPRYDR	m	050-054	Emergency	negative	-
XVDASRLXJYJW	m	030-034	Emergency	-	negative
CKUALJNEXNKE	f	025-029	Emergency	-	negative
DDPAKWEIQJND	m	030-034	Emergency	-	positive	no
YZJAOEWTLLMI	m	025-029	Emergency	-	negative
ZIRHZVWWTQFT	m	045-049	Emergency	-	negative
OIAXTCEVWIEV	f	025-029	Emergency	negative	-
PIGHAIUJSUJU	m	035-039	Infectious disease	-	negative
PSEPJRGUYYTV	m	080-084	Emergency	negative	-
ZNNJQOVAYGSR	m	040-044	Emergency	negative	-
RNJWTGPYNLFB	m	030-034	Emergency	-	negative
QNAFFUJYEINW	f	080-084	Infectious disease	-	negative
ELUDONYDDOMC	m	020-024	Emergency	-	negative
WZFLNKWZPVYS	m	030-034	Emergency	negative	-
SYTIXSBQVGKY	m	080-084	Infectious disease	-	negative
MXNBLDLKLGWW	f	055-059	Emergency	-	negative
PVDZMWSQSZXH	f	085-089	Infectious disease	negative	-
OTSOTVWCQZCL	m	080-084	Emergency	-	negative
TGADOQHSSCHN	f	060-064	Infectious disease	-	negative
EUJMDRXXOOZB	m	065-069	Infectious disease	negative	-
UCBHOKRAECKH	m	075-079	Emergency	-	negative
MKVTXNIDYOUU	f	025-029	Emergency	negative	-
BIQBHMJRGFDT	f	030-034	Emergency	-	negative
UBIRGWKPJSFB	f	050-054	Emergency	negative	-
OBLVZRJLRQEG	f	085-089	Infectious disease	-	negative
KZXFGDEYJFNU	f	090-094	Emergency	negative	-
TCXDITZVKZQH	m	070-074	Emergency	-	negative
EFLCXYHSSLLB	m	070-074	Infectious disease	-	negative
WIJBHVQKFCMD	f	055-059	Infectious disease	negative	-
FTRZGEGJWSAA	f	075-079	Infectious disease	-	negative
ONFANQXKMQZQ	f	055-059	Emergency	negative	-
NTGXIDZGUJCA	m	025-029	Emergency	-	positive	no
DFOXQIMYZYNL	m	055-059	Emergency	negative	-
SSRWODSSCSFQ	m	080-084	Infectious disease	-	negative
ALBMGPBAGRGN	m	020-024	Emergency	negative	-
JNKJJLRADGJY	m	035-039	Emergency	negative	-
TPPGGWYWOMRL	m	090-094	Infectious disease	negative	-
KMAZQZBHNEPK	m	085-089	Infectious disease	-	negative
VHDJXZYJBRZP	f	080-084	Infectious disease	-	negative
XKJYOURVWQWN	m	070-074	Emergency	-	negative
GWRGUTIHNGQT	f	090-094	Emergency	-	negative
WLHOGBXTGQWO	m	100-104	Infectious disease	-	negative
ECJQGRKFJXSS	m	025-029	Emergency	negative	-
FHYEMYHKHNSC	f	035-039	Emergency	-	negative
GNAEKJZAUBKX	f	065-069	Emergency	-	negative
GXIXNHAZINYO	f	085-089	Infectious disease	negative	-
MEXUCWXCASMS	f	030-034	Infectious disease	-	negative
DUXBRXUGAWBZ	f	075-079	Emergency	negative	-
QQGICCSEWCJI	f	045-049	Infectious disease	-	negative
UYZTINATWKAZ	f	080-084	Emergency	-	negative
TTMNJHTMVUKV	f	045-049	Emergency	-	negative
AJZNBWLVGDAJ	m	055-059	Infectious disease	-	negative
BCNETHPJZNFU	f	060-064	Emergency	negative	-
GKWROFACGBEN	f	080-084	Emergency	negative	-
XFSFSBMZFGVQ	f	080-084	Emergency	-	negative
JZEOMNVXQQAR	f	090-094	Emergency	-	negative
LPMOKXSNVJLL	f	025-029	Emergency	-	negative
WUOENVJOHHRI	m	095-099	Infectious disease	negative	-
GJLLPEHPRKWS	m	055-059	Infectious disease	-	negative
ZYCPTMISQKZC	f	070-074	Infectious disease	-	negative
XVLHEYLTKGEH	m	060-064	Infectious disease	negative	-
ESPVNBSGVAYR	m	025-029	Emergency	negative	-
RFYPEWDIMOBV	f	080-084	Infectious disease	-	negative
HIJNZYHTURTI	m	055-059	Emergency	negative	-
URSCUEEZNUVI	f	030-034	Infectious disease	-	negative
VSFTTIBBTZGO	f	085-089	Emergency	-	negative
PTXEKPYMEBLQ	f	090-094	Emergency	-	negative
MQSPILBKBAOG	m	025-029	Emergency	negative	-
CEJARMLVOHGM	f	090-094	Emergency	negative	-
XRDWDRQGPNBB	f	060-064	Emergency	negative	-
JAQXDOULTHDW	f	065-069	Emergency	negative	-
ZQLFGBCDCTRQ	f	055-059	Infectious disease	-	negative
ZRXDMTMKSAII	m	025-029	Infectious disease	-	positive	no
YAEVVQSEWTPY	m	075-079	Emergency	-	negative
CENHAUMBYSNZ	m	050-054	Emergency	negative	-
EFLFTNAMUJXJ	m	040-044	Infectious disease	negative	-
HLWDFSBAWALF	m	050-054	Emergency	negative	-
YDLLMULSXXQP	m	075-079	Emergency	-	negative
IVLETEDAPHMN	m	085-089	Emergency	-	negative
ICQWBIMOTMKY	f	045-049	Infectious disease	negative	-
XFJZOUFPCNKV	f	080-084	Infectious disease	-	negative
CMBKMWXCCSON	m	080-084	Emergency	-	negative
QYZRFXMLTLYX	f	045-049	Emergency	negative	-
BPFZHTUTAGHO	f	065-069	Infectious disease	-	negative
KVVPREVLXEWN	f	020-024	Emergency	-	negative
DDHVHDPSROSQ	f	045-049	Emergency	-	negative
XEPRCHYHWQXW	f	065-069	Emergency	-	negative
TXWUPVPSDUIQ	m	080-084	Emergency	-	negative
AGLVUATGZZMV	m	075-079	Emergency	negative	-
EIUIBEMNTDAP	m	065-069	Emergency	negative	-
LEMQCFUKVPMH	m	030-034	Emergency	-	negative
HMRIYLUGFBYD	f	035-039	Emergency	negative	-
QSZDGNUMNABF	m	095-099	Emergency	negative	-
EDERMWBTADUT	m	030-034	Emergency	negative	-
LNOGBVIQBRZW	m	080-084	Emergency	-	negative
LCTBZDEKSGXF	f	035-039	Emergency	-	negative
NXZPEYZNJMTC	f	080-084	Infectious disease	-	negative
EMAJTEJNWEWO	f	040-044	Emergency	-	negative
OAETBHHXIYJA	m	045-049	Emergency	-	negative
KDFKRKNYEBQB	f	045-049	Emergency	-	negative
AYHJXQDRYOXB	m	055-059	Emergency	-	negative
VVUWRVKQBJXX	f	080-084	Infectious disease	-	negative
YBXVIUYWSTMT	m	080-084	Emergency	-	negative
BFATHBFBQYUK	f	075-079	Emergency	-	negative
HNYYNIINGPDO	m	035-039	Infectious disease	-	negative
JNSNQMOLKABH	f	025-029	Emergency	negative	-
NVSNGHHSDYXR	m	030-034	Emergency	-	negative
PVMVSBROCKFK	m	040-044	Emergency	negative	-
UTZOGXNZDUTX	m	040-044	Emergency	negative	-
UCZOCECILUVC	f	030-034	Emergency	negative	-
GWVXQRSFFMIT	m	075-079	Emergency	negative	-
BFAJTHCPMWVR	f	030-034	Emergency	negative	-
LMBARWAVBMNO	f	080-084	Emergency	-	negative
PWXLCHJWFUNQ	m	075-079	Emergency	negative	-
TBWXBTCXSLUR	m	070-074	Infectious disease	-	negative
LGVMCREYAUIT	f	085-089	Infectious disease	-	negative
QPIRCDRCYSKD	f	065-069	Emergency	negative	-
NCCTDQGMILJR	m	080-084	Emergency	negative	-
FDSJCFAEKWTC	f	085-089	Emergency	-	negative
RTGILVPJAICX	m	040-044	Infectious disease	-	negative
DWNWHWIXWPQQ	f	100-104	Infectious disease	-	negative
GINYCMZOKVHS	m	080-084	Emergency	negative	-
CYWMLYWQQHSB	f	025-029	Infectious disease	-	negative
TBNLBHGBAGRA	f	085-089	Emergency	-	negative
LXMQOKDDIFON	m	075-079	Infectious disease	-	negative
ADRFHHFFTDXF	f	035-039	Emergency	negative	-
DLAUNIDIYXYV	m	090-094	Emergency	-	negative
JSUDWCXDXTSV	m	070-074	Emergency	-	negative
AIMPTIPYGBKM	f	060-064	Emergency	-	negative
FMGKHDYOHZZW	f	050-054	Infectious disease	-	negative
DOJTCRZFUGHL	m	045-049	Infectious disease	-	negative
EHNJNCYSEQOY	m	065-069	Infectious disease	-	negative
VJVAPKHDFNNL	m	035-039	Emergency	negative	-
IDCOCWZKEBNH	f	025-029	Emergency	negative	-
WJCUZJEJKCBD	f	080-084	Emergency	-	negative
JAKBNEXRFKCO	f	090-094	Emergency	-	negative
VRHCIZSVVOJJ	m	075-079	Infectious disease	-	negative
VAUAVGEJDVSO	f	045-049	Emergency	negative	-
OLHBIPYOCBCF	f	090-094	Emergency	negative	-
ZKYYVRRRMQIE	m	065-069	Emergency	-	negative
KYMEXYUVTPBO	f	075-079	Emergency	-	negative
TPNPYLHWCQZO	m	030-034	Emergency	positive	-	no
NZMRBSIYFYRJ	m	060-064	Infectious disease	-	negative
YQKTJFAUMOKC	f	030-034	Emergency	-	negative
YNENQRYGMPWM	m	070-074	Infectious disease	-	negative
YHAGFWLWXUER	m	075-079	Emergency	-	negative
QPIVIOUUTJSL	f	050-054	Emergency	negative	-
CCLLFTJTNPVQ	m	065-069	Emergency	-	negative
SBQQKQHGMZGA	m	070-074	Emergency	negative	-
CZAIAFVRKAIS	f	085-089	Emergency	negative	-
VLXYMNQBLWGD	m	080-084	Emergency	-	negative
AJTYDXCZZXHH	m	065-069	Emergency	-	negative
BKJRKJCNMPSF	m	075-079	Emergency	negative	-
GLSRXJRYTSAP	f	055-059	Emergency	-	negative
PIIQWOEDANMF	m	045-049	Emergency	negative	-
ACQNKCWESCMY	m	080-084	Infectious disease	-	negative
SRNYDPUNLDOG	m	050-054	Emergency	negative	-
RRQYPWOJEXOI	m	090-094	Infectious disease	-	negative
TYLARIWKBNEO	m	045-049	Emergency	negative	-
DPZDVONDUZEH	f	090-094	Emergency	negative	-
FGSRZMLQYFMP	m	060-064	Infectious disease	-	negative
RAXZNIGVHMAH	m	075-079	Emergency	negative	-
ZKKQYBZGKUCJ	m	070-074	Emergency	-	negative
UKTIMJKGTBIO	f	050-054	Infectious disease	-	negative
IAXLTITZZGBR	m	070-074	Emergency	-	negative
WUREYKINYBZE	f	070-074	Emergency	negative	-
HLZVLBEEOWNB	m	075-079	Emergency	negative	-
DRESJZOYHGBL	f	045-049	Emergency	negative	-
DHWDKIRDPUKQ	m	050-054	Emergency	-	negative
YDHDRONIVMDT	m	025-029	Emergency	-	negative
DXYHHHSBPUZF	m	085-089	Infectious disease	-	negative
YICCREDJIFHY	m	085-089	Emergency	-	negative
OTVYCRJHLBXQ	m	040-044	Emergency	-	negative
VQFXPIEYMYVU	m	025-029	Infectious disease	-	negative
POHLYLJMEYDT	f	080-084	Emergency	negative	-
ZHWBXERGMBDE	f	020-024	Emergency	-	negative
VHNVRZCNVAAZ	f	035-039	Emergency	negative	-
EAVIDFRSITSE	f	045-049	Infectious disease	-	negative
IJITFQTPHQDX	f	075-079	Emergency	-	negative
MOCFTGKVYUNI	f	030-034	Emergency	negative	-
ZSQYFJDDHNCN	f	035-039	Infectious disease	-	negative
FUDAIFCORLQV	f	030-034	Infectious disease	negative	-
KDERAYMWIYFE	f	075-079	Emergency	negative	-
ZOMGYHTTOIBN	m	055-059	Emergency	-	negative
SVCXDSSJXLAS	m	020-024	Emergency	negative	-
GFCRGITVFVEK	f	085-089	Emergency	-	negative
PZPOCUFKJVMF	m	090-094	Infectious disease	-	negative
YCIIRVVURJPP	f	065-069	Emergency	negative	-
LJTOZJISSTGQ	f	080-084	Emergency	negative	-
DAEYLAXDVFLN	m	055-059	Emergency	-	negative
JMEMPUREBACF	m	085-089	Emergency	negative	-
PHNAOYONKRXU	f	030-034	Emergency	-	negative
YPDDSYBYDUXV	m	070-074	Emergency	-	negative
NBYEYAIEFVFE	m	065-069	Emergency	-	negative
KICLFPNEEUIC	m	070-074	Infectious disease	negative	-
ZQRGUPQNBEQN	f	070-074	Emergency	-	negative
ZACZOYTJRNME	m	030-034	Emergency	-	negative
MRXYMOJODOAU	f	085-089	Emergency	-	negative
FKVUYQETZHOD	f	050-054	Infectious disease	-	negative
PSAEIUGUVTAS	f	035-039	Emergency	negative	-
FOBFRTCFMCSV	f	055-059	Emergency	negative	-
TATBEZMJEDSV	m	080-084	Infectious disease	-	negative
YRAMCNUMFSXY	m	055-059	Emergency	negative	-
KNMQKUUBQHZL	f	080-084	Emergency	negative	-
XDAXTDVUAPJS	f	040-044	Emergency	negative	-
DVMGZMJEMWGS	f	050-054	Emergency	-	negative
OBVARCCXAIQI	f	025-029	Emergency	-	negative
SNDAJXIZMCSW	f	070-074	Emergency	-	negative
GFMILVGYNNNX	f	085-089	Emergency	-	negative
KCLBQVXVRUJH	f	045-049	Infectious disease	negative	-
BGPXAYZKEHBZ	m	070-074	Emergency	negative	-
BUTZWGKNKRON	f	085-089	Emergency	-	negative
HHKQYLPAZLHR	f	050-054	Emergency	-	negative
YASOJMFINBCI	m	085-089	Infectious disease	-	negative
FWKTNIUOKNBE	m	020-024	Infectious disease	-	negative
VEAUCFVIBMJA	m	055-059	Emergency	negative	-
JEVEPPGYOVLV	m	050-054	Infectious disease	-	negative
ZLLNMERXHKYI	f	020-024	Emergency	-	negative
EYSXNKVHEJRM	f	025-029	Emergency	negative	-
BFUVBWQITNEM	m	080-084	Emergency	-	negative
THYFVZMHCDZB	m	070-074	Emergency	-	negative
LEKVPOIVQZCT	m	090-094	Infectious disease	-	negative
MWWOUBISRTKW	m	025-029	Infectious disease	-	negative
SCCVIEXMUKFW	m	065-069	Emergency	-	negative
GWTQNXGCPHOE	m	060-064	Emergency	-	negative
BOQJKHTGCXWB	m	060-064	Emergency	-	negative
YGNOJMPNGIGA	f	040-044	Infectious disease	-	negative
PKZQTYGHVVGI	m	075-079	Emergency	negative	-
OWYYWPKIRWFD	m	060-064	Emergency	-	negative
OSQMAYSXBBPJ	m	080-084	Emergency	-	negative
XNQDPIPJJZWX	m	045-049	Emergency	-	negative
VOCVMQHZIIAO	m	080-084	Emergency	-	negative
WWGARLPJPJFP	m	085-089	Emergency	-	negative
ZMQVLUZENSNN	m	075-079	Emergency	negative	-
ESBSSDXYRHOR	f	065-069	Infectious disease	-	negative
ODSBYKADJMPI	f	035-039	Emergency	-	negative
LMSSSTMLYHUO	m	045-049	Infectious disease	-	negative
AUWGFBDDJQWP	f	070-074	Emergency	-	negative
VASTDICPOZJJ	m	075-079	Emergency	negative	-
YFMDFAEVCUFH	f	075-079	Emergency	-	negative
ALIZKEWXZMCT	m	035-039	Emergency	negative	-
PJCXYEASOGQF	f	055-059	Emergency	-	negative
LHLLZWQFAZCP	f	085-089	Emergency	-	negative
IJAZSMSFAQHL	f	055-059	Infectious disease	-	negative
PJTOFNBRMGWS	f	020-024	Infectious disease	-	negative
XGVIDLDGILSU	m	080-084	Emergency	-	negative
XEKBSAKKRFPS	f	080-084	Infectious disease	-	negative
ADAUIKUOXVED	m	045-049	Emergency	-	negative
WCYMRPRWXHPJ	f	035-039	Emergency	negative	-
PTDWNUTLWIQU	m	035-039	Emergency	negative	-
CXLYRPNZKNGR	m	080-084	Emergency	negative	-
MFMNQDUFNUVO	m	025-029	Infectious disease	-	negative
PXKCVCQJHNYZ	m	065-069	Infectious disease	negative	-
EQMOTCZBGGLC	f	045-049	Infectious disease	-	negative
ODYCTRCSKYSC	m	020-024	Emergency	-	negative
SXGDEQVCBFLM	f	085-089	Infectious disease	-	negative
JYEUYNGZOHRO	f	055-059	Emergency	positive	-	no
EMVZXGZVGESH	m	060-064	Infectious disease	negative	-
UXXCFQSZZYLG	m	060-064	Emergency	-	negative
BBIZLVQJZJLE	f	050-054	Emergency	-	negative
ISDAPPXPBRDC	f	090-094	Emergency	negative	-
MIGOUZNOUDSK	f	075-079	Emergency	-	negative
KMBVFHAAAPDL	m	055-059	Emergency	-	negative
LBAGEOPGTJDP	m	020-024	Emergency	negative	-
QSMASZCWNERL	m	030-034	Emergency	-	negative
DRYRYPUJCCEI	f	020-024	Emergency	negative	-
QMBWHKTGKBJA	f	035-039	Emergency	-	negative
MLFQQOKIQJXP	f	065-069	Infectious disease	-	negative
RBXUHPTQFYTK	m	090-094	Emergency	negative	-
WBAGKHEDDVQM	m	030-034	Emergency	negative	-
INGMSZBNIMUE	f	035-039	Emergency	negative	-
MIGOTJGHRNDW	f	065-069	Emergency	-	negative
DFXPNAUQSWOH	m	035-039	Emergency	negative	-
MUXNASJEARDE	f	080-084	Emergency	-	negative
XNEYYEZQOWSY	m	025-029	Infectious disease	-	negative
BQENDUFGGEUQ	f	080-084	Emergency	-	negative
SJQDYHOPYYHF	f	035-039	Emergency	negative	-
CTAVRIOROHAK	f	035-039	Emergency	negative	-
KKOYNPEYVFDG	f	030-034	Infectious disease	-	negative
HSSCWYGUPOHC	m	065-069	Emergency	-	negative
MKBQFZDFFYAW	f	035-039	Infectious disease	-	negative
JVCGITKBJUZL	f	025-029	Emergency	negative	-
BQMAAHYOTQGC	m	025-029	Emergency	negative	-
RFELKXFEGHTN	f	055-059	Emergency	negative	-
ZGAZXEFZOICO	f	050-054	Infectious disease	-	negative
JKHFFVLWLJKY	m	075-079	Emergency	-	negative
YXTHTTOUTXFZ	m	060-064	Emergency	negative	-
KLVQORWVUKKM	f	035-039	Emergency	-	negative
UKFKJTLQNWDG	m	060-064	Infectious disease	-	negative
QHMRBKWRWZQW	m	035-039	Infectious disease	-	negative
RHMOHAOQZMYD	f	100-104	Emergency	-	negative
SYIJHHBMMBUN	f	060-064	Emergency	negative	-
CFUOOFJUHUZW	f	035-039	Emergency	-	negative
IACSLAGNHAFB	m	065-069	Emergency	negative	-
JGQICHNWOIZM	f	030-034	Emergency	negative	-
XOVOXHJUQBWK	f	055-059	Emergency	negative	-
IWYWMZQRJLEK	f	080-084	Emergency	negative	-
XXEUNWVBCXJV	f	030-034	Emergency	-	negative
XVZIKWCCKYAV	m	035-039	Emergency	negative	-
DUTLGQSCOQPB	f	070-074	Infectious disease	negative	-
EBJPLFQGIPNI	f	070-074	Emergency	-	negative
XAWUXYNLKXFF	f	030-034	Infectious disease	-	negative
YXEVPYCBZBNA	f	035-039	Emergency	negative	-
SXNUTRODKUKU	f	035-039	Emergency	negative	-
QVMZHVCETSJV	f	030-034	Emergency	-	negative
HULKXJXEZRAC	f	025-029	Emergency	negative	-
MWCIWKQIQKVO	f	030-034	Emergency	negative	-
FZOZZCDTBEFJ	m	065-069	Emergency	negative	-
RSHTFDJHQKXA	f	040-044	Infectious disease	-	negative
BAIGLGDFFDDW	f	080-084	Infectious disease	-	negative
PSTUMEQCMSSO	m	065-069	Emergency	-	negative
KTFNROZBCIXH	m	025-029	Emergency	-	negative
AEKUPQBSGRCB	f	035-039	Emergency	-	negative
BXNVKWHGHRIM	f	065-069	Emergency	negative	-
BFGJXQZSFIEB	f	070-074	Emergency	-	negative
OAXBJGEEQBPC	m	025-029	Emergency	-	negative
AZWVYJIUCQZC	f	085-089	Emergency	negative	-
MXFNXNLORZSL	f	070-074	Emergency	-	negative
YZXQSNJTWQVN	m	050-054	Emergency	positive	-	no
XDHUVCDEKKMR	m	045-049	Infectious disease	-	negative
TLMXXYYNGKBR	f	040-044	Emergency	negative	-
BSZLTQTLEAGW	f	085-089	Emergency	-	negative
FFLOVGUMDSVP	m	050-054	Emergency	-	negative
YOHOARAJZOKI	f	075-079	Emergency	negative	-
VRMCXXAZLWFA	f	040-044	Infectious disease	-	negative
NYGZZZVSOYUC	f	035-039	Emergency	-	negative
ACUSUJAKTWEE	m	080-084	Infectious disease	-	negative
PPCGDVIGNSFS	f	045-049	Emergency	negative	-
SSLSUPKYEDQW	m	080-084	Emergency	negative	-
ZBVPYUKLMBEY	m	020-024	Emergency	negative	-
VOLRRKMHSCLL	f	045-049	Emergency	negative	-
SGHPDBROYPKN	f	055-059	Emergency	negative	-
ODLLYAKNNUJM	f	035-039	Emergency	negative	-
SIXSZKCLAVVS	m	090-094	Emergency	-	negative
HBXJKFUHDBUY	f	080-084	Emergency	-	negative
QMREGMMNPBEH	f	090-094	Infectious disease	-	negative
VGIBCUNUCQUC	m	025-029	Infectious disease	-	negative
TNWVNBSTBSDJ	m	085-089	Emergency	-	negative
PMHKXQIVBLZV	f	090-094	Infectious disease	-	negative
CPKRFVLLQXKG	m	090-094	Infectious disease	-	negative
GLYRXVGQNVXX	m	065-069	Emergency	-	negative
OSXNFDMAXFXD	f	085-089	Infectious disease	-	negative
YQRJRPTKSJSE	f	025-029	Emergency	-	negative
JYPDMRKEYTSS	f	045-049	Emergency	negative	-
GNHTRLLMXEXD	f	035-039	Emergency	negative	-
PWBNHOMRRJWF	f	090-094	Emergency	-	negative
ZFOQLWHMZNSD	f	090-094	Emergency	-	negative
NOQQQAODAFWU	m	030-034	Emergency	negative	-
MLULOWLHDSSD	f	090-094	Infectious disease	negative	-
NTGJXKMSHPLA	f	100-104	Emergency	-	negative
DYPREHZGPEYM	m	065-069	Emergency	-	negative
EFPPMRXZACGU	m	065-069	Emergency	-	negative
DVNKCESNLLTE	m	035-039	Emergency	negative	-
UBCLHHOTNJJM	m	085-089	Emergency	-	negative
FDWRTGGSGQGG	f	055-059	Infectious disease	-	positive	no
QOLBYOEVATBE	f	085-089	Infectious disease	negative	-
EDNQBVEYKDZH	m	040-044	Emergency	-	negative
ZVLGUVRUUFOP	f	040-044	Emergency	-	negative
HVSQWZHMBOMS	f	065-069	Emergency	-	negative
EQEJQXCZDVIN	m	080-084	Emergency	-	negative
IZNVLFEEYFXP	m	045-049	Emergency	negative	-
IIMSVDVLCUGR	m	050-054	Emergency	-	negative
XVKYAQULUEZV	m	080-084	Infectious disease	negative	-
AYXVSNACJNLP	f	055-059	Infectious disease	negative	-
BTEJPLOBGXLD	m	085-089	Emergency	-	negative
AYDXEOUFQXED	m	070-074	Emergency	negative	-
LIFIBOBWYZGO	m	040-044	Emergency	-	negative
BRRXGBSMLPTB	m	070-074	Emergency	negative	-
LXMKDHZHGNDY	m	075-079	Infectious disease	-	negative
BBLPJBVCZEUH	m	065-069	Emergency	-	negative
RCPQNBZAXDKB	f	045-049	Emergency	negative	-
CCBNVKNUHKBB	f	085-089	Emergency	negative	-
YNAEBVBNGTSH	f	080-084	Emergency	-	negative
QVLUAGQOVQKF	m	075-079	Infectious disease	-	negative
MBGXAAYALDOR	f	075-079	Infectious disease	-	negative
GGPGTDSBQIAL	f	090-094	Emergency	-	negative
AXNHTGREXZZO	f	035-039	Emergency	-	negative
ORJWHIMFAQII	f	065-069	Infectious disease	-	negative
RQUGVZVGEEGZ	m	075-079	Emergency	negative	-
GZSMAROUYPGY	m	050-054	Emergency	negative	-
KLHVXUSEWMKQ	m	075-079	Emergency	negative	-
KDNJJEHHBGOC	f	035-039	Emergency	negative	-
JSIPULHSTEFO	f	040-044	Emergency	-	negative
KDMAYVVLTCDJ	f	035-039	Emergency	-	negative
GPIZNBHMEVCJ	m	020-024	Infectious disease	-	negative
JDMFVRWIUEFQ	m	055-059	Emergency	negative	-
VLMXXPHEIHLX	m	075-079	Emergency	negative	-
PUTXBYOORCNI	m	040-044	Emergency	negative	-
WSJHFTQZJKEI	m	035-039	Infectious disease	negative	-
ZDRXYGDCCFWM	f	060-064	Emergency	negative	-
VKGRGPABXBWN	m	050-054	Emergency	-	negative
OBVMSXDXNBNT	f	035-039	Emergency	negative	-
RRHSCZKHXGWR	m	075-079	Emergency	-	negative
JKTIOEJEJAPO	f	085-089	Emergency	-	negative
CJJXAOBVEEZS	f	075-079	Emergency	-	negative
QKGXSHRDHBBI	m	065-069	Emergency	negative	-
LUVKYOWVFWAY	m	060-064	Infectious disease	-	negative
YJBUZOJQGZUB	m	025-029	Emergency	-	negative
VSEVWDSXIDAN	m	030-034	Emergency	negative	-
OMYNQGCSGPZX	m	035-039	Emergency	negative	-
BEGSCGWRABVQ	m	085-089	Infectious disease	-	negative
UHMQWRKBVJDS	f	035-039	Emergency	-	negative
BSVELDEXOQAB	f	040-044	Emergency	-	negative
VNFWKLCMLVGD	m	070-074	Emergency	negative	-
HGNCQSTIWWCF	m	050-054	Emergency	negative	-
XPEWEJAMLLHF	m	080-084	Emergency	negative	-
DRCXYUSVRYMI	m	065-069	Emergency	-	negative
VTVMDQVVLQUM	m	080-084	Emergency	negative	-
QYIHBQBPONBV	f	025-029	Emergency	-	negative
BXALQAAOWLCR	m	070-074	Emergency	negative	-
AHLTGGECGBGY	m	025-029	Emergency	negative	-
RISPUCIGCETV	f	085-089	Emergency	-	negative
FTJSIOZQQSHO	f	020-024	Emergency	negative	-
DKQKMIXLSDOY	f	045-049	Emergency	-	negative
GZCMDTNYPMKP	f	065-069	Emergency	-	negative
MIRBLITFIGVB	m	080-084	Emergency	-	negative
CVYFRKAJAQVK	f	050-054	Infectious disease	-	negative
CXUOSFPRQKLR	m	085-089	Emergency	negative	-
YMYZWTAJDMPJ	f	065-069	Emergency	-	negative
DRJRRQFGJDTU	f	065-069	Infectious disease	-	negative
MXULSOVXEWTC	m	055-059	Infectious disease	-	negative
XFLERBNBZHGX	m	025-029	Emergency	-	negative
TCRRDULWYBRZ	m	085-089	Infectious disease	-	negative
CRWHPJRVYHHD	m	055-059	Emergency	-	negative
DFSOUCXTEBPX	f	035-039	Emergency	-	negative
CJAHGGWILSBP	f	065-069	Emergency	-	negative
KSOJFRRJQAEJ	f	090-094	Infectious disease	negative	-
NBJWOYQAQXQR	m	065-069	Infectious disease	negative	-
VSETWIPACFZJ	f	030-034	Emergency	-	negative
YOQDKXWMUPGZ	m	060-064	Infectious disease	-	positive	no
RBTRJTQPJVYJ	m	070-074	Emergency	-	negative
OXIIFVNZWBAG	f	030-034	Emergency	negative	-
WCEUZTCCUDTS	f	075-079	Emergency	negative	-
BLEOVUWGKUNF	m	035-039	Emergency	negative	-
KCVNXQTGHLJN	f	065-069	Emergency	-	negative
OXVKCQRZFYOG	f	085-089	Emergency	-	negative
WHYVFRLOOUMO	f	065-069	Emergency	-	negative
GECYANEFLYHI	f	030-034	Emergency	negative	-
LYGQUZHYARFM	m	035-039	Infectious disease	-	negative
TUERUBZSVOON	f	025-029	Emergency	negative	-
AWNRVHODHNFM	f	025-029	Emergency	negative	-
CJLIGJTKQUUU	m	020-024	Emergency	-	negative
BIKVSZPRJDNP	f	095-099	Infectious disease	-	negative
DOTIWDFYHTPO	f	085-089	Emergency	negative	-
AXYXGCTDGAIA	m	050-054	Emergency	negative	-
IIBHFETXHZZI	f	080-084	Emergency	-	negative
YGZNIQXIVWAL	m	040-044	Emergency	negative	-
XZQLDCQRYUDY	f	065-069	Emergency	-	negative
TBKSZMZDXIXH	m	030-034	Emergency	-	negative
DMQQPEDZCRZW	m	040-044	Emergency	-	negative
IYIFBZYMOBFZ	f	035-039	Emergency	negative	-
QYJTCJLJBSFU	f	055-059	Emergency	-	negative

## Sheet: legend2
Code	anonymized code of the patient
Sex	Either male (m) or female (f)
Age range	5-year range reported
Hospital ward	Either Emergengy (A&E) or Infectious Disease
DNCOV	Swab nasopharingeal RT-PCR testing
ANCOV	Rapid Antigen Test
Pneumonia	Either 'yes' or 'no' diagnosed pneumonia

## Sheet: Monthly Prevalence of Mutations
Concordance	Date	Mut	Freq	TotSeq	Perc	Country
no	2020-01-01	D348Y	0	20	0	Italy
no	2020-01-01	M234I-A376T	0	20	0	Italy
no	2020-01-01	P365S	0	20	0	Italy
no	2020-01-01	Q229H	0	20	0	Italy
no	2020-01-01	R209I	0	20	0	Italy
yes	2020-01-01	A220V	0	20	0	Italy
yes	2020-01-01	G204R	5	20	0.25	Italy
yes	2020-01-01	R203K	5	20	0.25	Italy
yes	2020-01-01	T141I	0	20	0	Italy
no	2020-02-01	D348Y	0	98	0	Italy
no	2020-02-01	M234I-A376T	0	98	0	Italy
no	2020-02-01	P365S	0	98	0	Italy
no	2020-02-01	Q229H	0	98	0	Italy
no	2020-02-01	R209I	0	98	0	Italy
yes	2020-02-01	A220V	0	98	0	Italy
yes	2020-02-01	G204R	20	98	0.204082	Italy
yes	2020-02-01	R203K	20	98	0.204082	Italy
yes	2020-02-01	T141I	0	98	0	Italy
no	2020-03-01	D348Y	0	610	0	Italy
no	2020-03-01	M234I-A376T	0	610	0	Italy
no	2020-03-01	P365S	0	610	0	Italy
no	2020-03-01	Q229H	0	610	0	Italy
no	2020-03-01	R209I	0	610	0	Italy
yes	2020-03-01	A220V	0	610	0	Italy
yes	2020-03-01	G204R	226	610	0.370492	Italy
yes	2020-03-01	R203K	226	610	0.370492	Italy
yes	2020-03-01	T141I	0	610	0	Italy
no	2020-04-01	D348Y	0	246	0	Italy
no	2020-04-01	M234I-A376T	0	246	0	Italy
no	2020-04-01	P365S	0	246	0	Italy
no	2020-04-01	Q229H	0	246	0	Italy
no	2020-04-01	R209I	0	246	0	Italy
yes	2020-04-01	A220V	0	246	0	Italy
yes	2020-04-01	G204R	99	246	0.402439	Italy
yes	2020-04-01	R203K	99	246	0.402439	Italy
yes	2020-04-01	T141I	0	246	0	Italy
no	2020-05-01	D348Y	0	69	0	Italy
no	2020-05-01	M234I-A376T	0	69	0	Italy
no	2020-05-01	P365S	0	69	0	Italy
no	2020-05-01	Q229H	0	69	0	Italy
no	2020-05-01	R209I	0	69	0	Italy
yes	2020-05-01	A220V	0	69	0	Italy
yes	2020-05-01	G204R	33	69	0.478261	Italy
yes	2020-05-01	R203K	33	69	0.478261	Italy
yes	2020-05-01	T141I	0	69	0	Italy
no	2020-06-01	D348Y	0	139	0	Italy
no	2020-06-01	M234I-A376T	0	139	0	Italy
no	2020-06-01	P365S	0	139	0	Italy
no	2020-06-01	Q229H	0	139	0	Italy
no	2020-06-01	R209I	0	139	0	Italy
yes	2020-06-01	A220V	1	139	0.00719425	Italy
yes	2020-06-01	G204R	115	139	0.827338	Italy
yes	2020-06-01	R203K	115	139	0.827338	Italy
yes	2020-06-01	T141I	0	139	0	Italy
no	2020-07-01	D348Y	0	49	0	Italy
no	2020-07-01	M234I-A376T	0	49	0	Italy
no	2020-07-01	P365S	0	49	0	Italy
no	2020-07-01	Q229H	0	49	0	Italy
no	2020-07-01	R209I	1	49	0.0204082	Italy
yes	2020-07-01	A220V	0	49	0	Italy
yes	2020-07-01	G204R	39	49	0.795918	Italy
yes	2020-07-01	R203K	39	49	0.795918	Italy
yes	2020-07-01	T141I	0	49	0	Italy
no	2020-08-01	D348Y	0	88	0	Italy
no	2020-08-01	M234I-A376T	0	88	0	Italy
no	2020-08-01	P365S	2	88	0.0227273	Italy
no	2020-08-01	Q229H	2	88	0.0227273	Italy
no	2020-08-01	R209I	0	88	0	Italy
yes	2020-08-01	A220V	17	88	0.193182	Italy
yes	2020-08-01	G204R	59	88	0.670455	Italy
yes	2020-08-01	R203K	59	88	0.670455	Italy
yes	2020-08-01	T141I	0	88	0	Italy
no	2020-09-01	D348Y	0	160	0	Italy
no	2020-09-01	M234I-A376T	3	160	0.01875	Italy
no	2020-09-01	P365S	23	160	0.14375	Italy
no	2020-09-01	Q229H	0	160	0	Italy
no	2020-09-01	R209I	0	160	0	Italy
yes	2020-09-01	A220V	87	160	0.54375	Italy
yes	2020-09-01	G204R	62	160	0.3875	Italy
yes	2020-09-01	R203K	62	160	0.3875	Italy
yes	2020-09-01	T141I	0	160	0	Italy
no	2020-10-01	D348Y	0	365	0	Italy
no	2020-10-01	M234I-A376T	37	365	0.10137	Italy
no	2020-10-01	P365S	43	365	0.117808	Italy
no	2020-10-01	Q229H	0	365	0	Italy
no	2020-10-01	R209I	1	365	0.00273973	Italy
yes	2020-10-01	A220V	211	365	0.578082	Italy
yes	2020-10-01	G204R	63	365	0.172603	Italy
yes	2020-10-01	R203K	63	365	0.172603	Italy
yes	2020-10-01	T141I	8	365	0.0219178	Italy
no	2020-11-01	D348Y	0	237	0	Italy
no	2020-11-01	M234I-A376T	24	237	0.101266	Italy
no	2020-11-01	P365S	23	237	0.0970464	Italy
no	2020-11-01	Q229H	1	237	0.00421941	Italy
no	2020-11-01	R209I	0	237	0	Italy
yes	2020-11-01	A220V	148	237	0.624473	Italy
yes	2020-11-01	G204R	31	237	0.130802	Italy
yes	2020-11-01	R203K	31	237	0.130802	Italy
yes	2020-11-01	T141I	9	237	0.0379747	Italy
no	2020-12-01	D348Y	0	933	0	Italy
no	2020-12-01	M234I-A376T	56	933	0.0600214	Italy
no	2020-12-01	P365S	42	933	0.0450161	Italy
no	2020-12-01	Q229H	4	933	0.00428725	Italy
no	2020-12-01	R209I	0	933	0	Italy
yes	2020-12-01	A220V	586	933	0.628081	Italy
yes	2020-12-01	G204R	180	933	0.192926	Italy
yes	2020-12-01	R203K	180	933	0.192926	Italy
yes	2020-12-01	T141I	17	933	0.0182208	Italy
no	2020-01-01	D348Y	NA	NA	NA	Veneto
no	2020-01-01	M234I-A376T	NA	NA	NA	Veneto
no	2020-01-01	P365S	NA	NA	NA	Veneto
no	2020-01-01	Q229H	NA	NA	NA	Veneto
no	2020-01-01	R209I	NA	NA	NA	Veneto
yes	2020-01-01	A220V	NA	NA	NA	Veneto
yes	2020-01-01	G204R	NA	NA	NA	Veneto
yes	2020-01-01	R203K	NA	NA	NA	Veneto
yes	2020-01-01	T141I	NA	NA	NA	Veneto
no	2020-02-01	D348Y	NA	NA	NA	Veneto
no	2020-02-01	M234I-A376T	NA	NA	NA	Veneto
no	2020-02-01	P365S	NA	NA	NA	Veneto
no	2020-02-01	Q229H	NA	NA	NA	Veneto
no	2020-02-01	R209I	NA	NA	NA	Veneto
yes	2020-02-01	A220V	NA	NA	NA	Veneto
yes	2020-02-01	G204R	NA	NA	NA	Veneto
yes	2020-02-01	R203K	NA	NA	NA	Veneto
yes	2020-02-01	T141I	NA	NA	NA	Veneto
no	2020-03-01	D348Y	0	125	0	Veneto
no	2020-03-01	M234I-A376T	0	125	0	Veneto
no	2020-03-01	P365S	0	125	0	Veneto
no	2020-03-01	Q229H	0	125	0	Veneto
no	2020-03-01	R209I	0	125	0	Veneto
yes	2020-03-01	A220V	0	125	0	Veneto
yes	2020-03-01	G204R	36	125	0.288	Veneto
yes	2020-03-01	R203K	36	125	0.288	Veneto
yes	2020-03-01	T141I	0	125	0	Veneto
no	2020-04-01	D348Y	0	49	0	Veneto
no	2020-04-01	M234I-A376T	0	49	0	Veneto
no	2020-04-01	P365S	0	49	0	Veneto
no	2020-04-01	Q229H	0	49	0	Veneto
no	2020-04-01	R209I	0	49	0	Veneto
yes	2020-04-01	A220V	0	49	0	Veneto
yes	2020-04-01	G204R	16	49	0.326531	Veneto
yes	2020-04-01	R203K	16	49	0.326531	Veneto
yes	2020-04-01	T141I	0	49	0	Veneto
no	2020-05-01	D348Y	0	2	0	Veneto
no	2020-05-01	M234I-A376T	0	2	0	Veneto
no	2020-05-01	P365S	0	2	0	Veneto
no	2020-05-01	Q229H	0	2	0	Veneto
no	2020-05-01	R209I	0	2	0	Veneto
yes	2020-05-01	A220V	0	2	0	Veneto
yes	2020-05-01	G204R	2	2	1	Veneto
yes	2020-05-01	R203K	2	2	1	Veneto
yes	2020-05-01	T141I	0	2	0	Veneto
no	2020-06-01	D348Y	0	4	0	Veneto
no	2020-06-01	M234I-A376T	0	4	0	Veneto
no	2020-06-01	P365S	0	4	0	Veneto
no	2020-06-01	Q229H	0	4	0	Veneto
no	2020-06-01	R209I	0	4	0	Veneto
yes	2020-06-01	A220V	0	4	0	Veneto
yes	2020-06-01	G204R	4	4	1	Veneto
yes	2020-06-01	R203K	4	4	1	Veneto
yes	2020-06-01	T141I	0	4	0	Veneto
no	2020-07-01	D348Y	NA	NA	NA	Veneto
no	2020-07-01	M234I-A376T	NA	NA	NA	Veneto
no	2020-07-01	P365S	NA	NA	NA	Veneto
no	2020-07-01	Q229H	NA	NA	NA	Veneto
no	2020-07-01	R209I	NA	NA	NA	Veneto
yes	2020-07-01	A220V	NA	NA	NA	Veneto
yes	2020-07-01	G204R	NA	NA	NA	Veneto
yes	2020-07-01	R203K	NA	NA	NA	Veneto
yes	2020-07-01	T141I	NA	NA	NA	Veneto
no	2020-08-01	D348Y	0	17	0	Veneto
no	2020-08-01	M234I-A376T	0	17	0	Veneto
no	2020-08-01	P365S	0	17	0	Veneto
no	2020-08-01	Q229H	0	17	0	Veneto
no	2020-08-01	R209I	2	17	0.117647	Veneto
yes	2020-08-01	A220V	6	17	0.352941	Veneto
yes	2020-08-01	G204R	8	17	0.470588	Veneto
yes	2020-08-01	R203K	8	17	0.470588	Veneto
yes	2020-08-01	T141I	0	17	0	Veneto
no	2020-09-01	D348Y	NA	NA	NA	Veneto
no	2020-09-01	M234I-A376T	NA	NA	NA	Veneto
no	2020-09-01	P365S	NA	NA	NA	Veneto
no	2020-09-01	Q229H	NA	NA	NA	Veneto
no	2020-09-01	R209I	NA	NA	NA	Veneto
yes	2020-09-01	A220V	NA	NA	NA	Veneto
yes	2020-09-01	G204R	NA	NA	NA	Veneto
yes	2020-09-01	R203K	NA	NA	NA	Veneto
yes	2020-09-01	T141I	NA	NA	NA	Veneto
no	2020-10-01	D348Y	0	2	0	Veneto
no	2020-10-01	M234I-A376T	0	2	0	Veneto
no	2020-10-01	P365S	0	2	0	Veneto
no	2020-10-01	Q229H	0	2	0	Veneto
no	2020-10-01	R209I	0	2	0	Veneto
yes	2020-10-01	A220V	1	2	0.5	Veneto
yes	2020-10-01	G204R	1	2	0.5	Veneto
yes	2020-10-01	R203K	1	2	0.5	Veneto
yes	2020-10-01	T141I	0	2	0	Veneto
no	2020-11-01	D348Y	0	55	0	Veneto
no	2020-11-01	M234I-A376T	9	55	0.163636	Veneto
no	2020-11-01	P365S	3	55	0.0545455	Veneto
no	2020-11-01	Q229H	0	55	0	Veneto
no	2020-11-01	R209I	0	55	0	Veneto
yes	2020-11-01	A220V	31	55	0.563636	Veneto
yes	2020-11-01	G204R	6	55	0.109091	Veneto
yes	2020-11-01	R203K	6	55	0.109091	Veneto
yes	2020-11-01	T141I	2	55	0.0363636	Veneto
no	2020-12-01	D348Y	0	87	0	Veneto
no	2020-12-01	M234I-A376T	17	87	0.195402	Veneto
no	2020-12-01	P365S	5	87	0.0574713	Veneto
no	2020-12-01	Q229H	0	87	0	Veneto
no	2020-12-01	R209I	0	87	0	Veneto
yes	2020-12-01	A220V	48	87	0.551724	Veneto
yes	2020-12-01	G204R	12	87	0.137931	Veneto
yes	2020-12-01	R203K	12	87	0.137931	Veneto
yes	2020-12-01	T141I	0	87	0	Veneto

## Sheet: legend3
Concordance	Either concordant ('yes') or discondant ('no') antigen and moleculat tests
Date	Month of data collection
Mut	Type of amino acid mutation
Freq	Absolute number of sequences carryng the mutation in the corresponding month
TotSeq	Total number of sequences in the corresponding month
Perc	Freq/TotSq
Country	Countries/Regions analysed (Europe, Italy, veneto)

## Sheet: N protein
N protein
Test results	Name	GISAID acc number	GISAID name	Full length Sequence Coverage (Avg)	Ct nasal swab	Ct Viral Isolation	Ag test nasal swab	Ag test Viral Isolation	Lineage	Clade (Nextstrain)	Genomic Mutations regarding N (28274..29533)							aa Mutations
Concordant	C1_2_B.1.1.1	EPI_ISL_1163845	hCoV-19/Italy/VEN-C1_2_B_1_1_1/2020	36258.7	12		Positive		B.1.1.1	20D	G28881A	G28882A	G28883C					N:R203K	N:G204R
Concordant	C1_4_B.1	EPI_ISL_1163841	hCoV-19/Italy/VEN-C1_4_B_1/2020	226.121	14		Positive		B.1	20A	C28957T
Concordant	C1_5_B.1.177	EPI_ISL_1163840	hCoV-19/Italy/VEN-C1_5_B_1_177/2020	21942.7	12		Positive		B.1.177	20E (EU1)	C28695T	C28932T						N:T141I	N:A220V
Concordant	C1_6_B.1.177	EPI_ISL_1163844	hCoV-19/Italy/VEN-C1_6_B_1_177/2020	46.7251	21		Positive		B.1.177	20E (EU1)	C28932T							N:A220V
Discordant	D1_7_B.1.1.119	EPI_ISL_1163839	hCoV-19/Italy/VEN-D1_7_B_1_1_119/2020	122.7	25	35	Negative	Negative	B.1.1.119	20B	C28807T	A28877T	G28878C	G28881A	G28882A	G28883C	G28899T	N:R203K	N:G204R	N:R209I
Discordant	D1_8_B.1.177.7	EPI_ISL_1173515	hCoV-19/Italy/VEN-D1_8_B-1-177-7/2020	31.9678	22	35	Negative	Negative	B.1.177.7	20E (EU1)	C28932T	C29366T						N:A220V	N:P365S
Discordant	D2_1_B.1.160	EPI_ISL_1163834	hCoV-19/Italy/VEN-D2_1_B_1_160/2020	425.748	30	34	Negative	Negative	B.1.160	20A.EU2	G28975C	G29399A						N:M234I	N:A376T
Discordant	D2_2_B.1.177	EPI_ISL_1163836	hCoV-19/Italy/VEN-D2_2_B_1_177/2020	752.25	25		Negative		B.1.177	20E (EU1)	C28932T	G28960T						N:A220V	N:Q229H
Discordant	D2_3_B.1.177.4	EPI_ISL_1163832	hCoV-19/Italy/VEN-D2_3_B_1_177_4/2020	5846.04	22	29	Negative	Negative	B.1.177.4	20E (EU1)	C28932T	G29315T						N:A220V	N:D348Y
Discordant	D2_4_B.1.160	EPI_ISL_1163833	hCoV-19/Italy/VEN-D2_4_B_1_160/2020	129.399	28		Negative		B.1.160	20A.EU2	G28975C	G29399A						N:M234I	N:A376T
Discordant	D2_6_B.1.177	EPI_ISL_1163835	hCoV-19/Italy/VEN-D2_6_B_1_177/2020	47.1763	28		Negative		B.1.177	20E (EU1)	C28932T	C29366T	C29386T					N:A220V	N:P365S
Discordant	D2_7_B.1.160	EPI_ISL_1163831	hCoV-19/Italy/VEN-D2_7_B_1_160/2020	1057.09	26		Negative		B.1.160	20A.EU2	G28975C	G29399A						N:M234I	N:A376T
Concordant	C_Vo_110_B	EPI_ISL_1064050	hCoV-19/Italy/VEN-SR-110-B/2020	501.95	30	12.5	Not done	Positive	B	19A
Concordant	C_Vo_15_B	EPI_ISL_1064071	hCoV-19/Italy/VEN-SR-15-B/2020	2637.45	23	14	Not done	Positive	B	19A
Concordant	C_Vo_40_B	EPI_ISL_1064091	hCoV-19/Italy/VEN-SR-40-B/2020	1261	23	12	Not done	Positive	B	19A	C28315T
Concordant	C_Vo_42_B	EPI_ISL_1064112	hCoV-19/Italy/VEN-SR-42-B/2020	1673.12	27	12.1	Not done	Positive	B	19A
Concordant	C_Vo_46_B	EPI_ISL_1064094	hCoV-19/Italy/VEN-SR-46-B/2020	4051.38	20	12.2	Not done	Positive	B	19A
